# Supplementary material
Source: publisher site journal article supplement (https://static.cambridge.org/content/id/urn:cambridge.org:id:article:S0016756820001144/resource/name/S0016756820001144supp001.doc)
Supplement: Supplementary file 1 [file S0016756820001144supp001.doc]

Supporting Information for

**Early Silurian granitic rocks and associated enclaves as evidence of rapid cooling in cognate magma system: the case of the Xuehuading–Panshanchong pluton, South China Block**

Quan Ou1*,2, Jian-Qing Lai2*, Bruna B. Carvalho3, Feng Zi4, Zi-Qi Jiang5, Kun Wang6, Yi-Zhi Liu5

1State Key Laboratory of Oil and Gas Reservoir Geology and Exploitation, Institute of Sedimentary Geology, Chengdu University of Technology, Chengdu, 610059, China , 2Key Laboratory of Metallogenic Prediction of Nonferrous Metals and Geological Environment Monitoring, Ministry of Education, School of Geosciences and Info–Physics, Central South University, Changsha 410083, China, 3Dipartimento di Geoscienze, Università degli studi di Padova, Via G. Gradenigo 6, 35131 Padova, Italy, 4Institute of Mineral Engineering, Hunan University of Science and Technology, Xiangtan, 411201, China, 5School of Earth Science, Guilin University of Technology, Guilin, 541004, China, 6School of Earth Sciences, China University of Geosciences, Wuhan, 430074, China

**Contents of this file**

Figure S1 to S2

Supplementary file 1 to 2

Tables S1 to S8

**Introduction**

This file provides additional information on the site with enclaves exposed and outcrop photographs (Figure S1), the effects of alteration (Supplementary file 1 and Figure S2), estimated magma crystallization conditions (Supplementary file 2), the tables of LA-ICP-MS U-Pb zircon data (Table S1), mineral compositions (mica, amphibole, feldspar, and opaque mineral) (Table S2), zircon trace element data (Table S3) including Hf isotopes (Table S5), whole-rock major and trace element contents, Nd isotopic ratios (Table S4), calculated crystallization conditions (Table S6) and results of the modelling of partial melting (Table S7) and fractional crystallization (Table S8) of the granitic rocks in the Xuehuading-Pangshanchong area, South China Block.

Supplementary file 1: Effects of alteration

The presence of abundant secondary minerals such as kaolinite and sericite replacing primary igneous phases (e.g. plagioclase) indicates that the studied granitic rocks experienced alteration and the abundance of some mobile trace elements could have been modified, consistent with their variable LOI values (0.20–2.86 wt.%) (Table S4). Thus, the potential effects of theses processes have been assessed, and details are shown below.

We have evaluated the elemental mobility in the variation diagrams with loss on ignition (LOI) as horizontal axis and the elements of interest as vertical axis. In this study, LOI is used as the horizontal axis, because it represents an index of intense weathering and hydrothermal alteration (Wang *et al.,* 2006). For the studied granitic rocks from Xuehuading-Pangshanchong, the alkali metals (such as Na) show good correlation with LOI values, suggesting that they have undergone variable degrees of mobility during post–magmatic processes (Wang *et al.,* 2006). Conversely, the high field strength elements (HFSE, such as Ta, Ti and Hf), rare earth elements (REE), Y, and Th are not correlated with LOI values (Fig. S2 and Table S4), indicating that these elements were essentially immobile during metamorphism and alteration (Wang *et al.,* 2006). Chondrite–normalized REE and primitive–mantle normalized trace–element diagrams generally exhibit smooth and coherent patterns with negligible Ce and Eu anomalies, which also support the limited mobility of the REE (Fig. 7a and Table S4). Transition metal elements (such as Cr), and MgO do not display coherent trends with LOI (Fig. S2 and Table S4), suggesting that these elements were relatively immobile.

**Reference**

**Wang Q, Xu JF, Jian P, Bao ZW, Zhao Z.H, Li CF, Xiong XL and Ma** **JL** (2006), Petrogenesis of Adakitic Porphyries in an Extensional Tectonic Setting, Dexing, South China: Implications for the Genesis of Porphyry Copper Mineralization. *Journal of Petrology* **47**, 119-144.

Supplementary file 2: Estimated magma crystallization conditions

**Zircon**

Magma crystallization conditions can be estimated using zircon saturation thermometry (T–Zrn, Watson & Harrison, 1983), Titanium (Ti)–in–zircon thermometer (T–Zr–Ti, Ferry & Watson, 2007) to magma temperature (T), and zircon Ce4+/Ce3+ and Eu/Eu* to magma oxygen fugacity (fO2) (Ballard *et al.,* 2002).

The zirconium (Zr) contents of the granodiorites and biotite granites vary from 149–258 ppm (mean value 205 ppm) and 60–62 ppm (mean value 61 ppm), respectively (Table S4). Both values are relatively higher (granodiorites) and lower (biotite granites) than the contents normally found in granitoids (mean values of 151 ppm and 165 ppm to I–type and S–type granites, respectively, Whalen *et al.,* 1987), indicating that the magma was saturated in Zr in the case of granodiorites, while undersaturated in the biotite granites (e.g. Miller *et al.,* 2003). These features are consistent with the presence of inherited zircon in granodiorites (Fig. 3b–c and Table S1) and the absence in the biotite granites (Fig. 3d and Table S1). Zircon saturation temperatures (T–Zrn) calculated from bulk rock compositions provide the maximum (granodiorites) and minimum estimates (biotite granites) of magma temperature, respectively. The calculated T–Zrn values for the granodiorites, biotite granites and enclaves in XHD are 829–871 °C (mean= 852 ± 2 °C), 747–749 °C (mean= 748 ± 15 °C), and 838–873 °C (mean= 858 ± 2 °C), respectively (Fig. 9a and Table S4). The T–Zrn values of samples from PSC are 837 °C for the granodiorite, and 782 °C for the biotite granite (Fig. 9a and Table S4).

Titanium content in zircon is suitable as a potential indicator of zircon crystallization temperature (Watson & Harrison, 2005; Watson *et al.,* 2006). The crystallization temperatures of zircon were calculated by using the revised calibration of the titanium–in zircon thermometer (T–Zr–Ti, Ferry & Watson, 2007). In the XHD samples, the results show that the magmatic zircon grains crystallized between 692–995 °C (granodiorites, mean=781 ± 4 °C) and 695–929 °C (biotite granites, mean=786 ± 3.3 °C) (Fig. 9a and Table S3). There are two zircon grains in granodiorites of XHD with abnormal high T–Zr–Ti values (1209 °C to spot 01 and 1018 °C spot 07), similar to the spot 8 (1048 °C) with Pb loss (Fig. 3 and Table S3), and therefore were disregarded. Certainly, such unusual Ti–in–zircon temperature may be a result from atypical Ti concentrations with the additional of tiny inclusions. The T–Zr–Ti values range from 735–931 °C (granodiorites of PSC, mean=784 ± 0.4 °C) (Fig. 9a and Table S5).

Among the REEs, Cerium (Ce) and Europium (Eu) in zircons commonly are sensitive to magma oxidation state due to their multiple valence states (Trail *et al.,* 2012). Qualitative estimates of oxygen fugacities were made using zircon Ce4+/Ce3+ and Eu/Eu* (Ballard *et al.,* 2002; Qiu *et al.,* 2013; Wang *et al.,* 2013c; Zhang *et al.,* 2017). The detailed method used here was according to Ballard *et al.* (2002), which combines whole–rock trace element with zircon trace element data. Oxygen fugacities in this study (fO2–Zr) were calculated using calibration methods from Smythe and Brenan (2015). In this model, oxygen fugacity calibration depends on temperature and Ce4+/Ce3+ of the melt. Temperatures used in this calibration were the values obtained by Ti–in–zircon thermometer of the magmatic zircons. The calculated Ce4+/Ce3+ and Eu/Eu* varies from 7 to 207 (mean value 98, n=36) and 0.10 to 0.55 (mean value 0.19, n=36) in granodiorites, 4 to 93 (mean value 47, n=15) and 0.12 to 0.28 (mean value 0.19, n=15) in biotite granites from XHD, 7 to 546 (mean value 300, n=19) and 0.06 to 0.67 (mean value 0.38, n=19) in granodiorites from PSC, respectively (Table S5). The inferred oxygen fugacity ranges from △NNO–1.26 to △NNO–4.44 in granodiorites from XHD, △NNO–4.80 to △NNO–3.05 in biotite granites from XHD, and △NNO–3.30 to △NNO–1.53 in granodiorites from PSC (Fig. 9c and Table S3).

**Amphibole**

Amphibole is a common igneous mineral in hydrous calc–alkalic magmas crystallized at depth. The chemical composition of amphibole is sensitive to intensive parameters such as temperature (T), pressure (P), oxygen fugacity (fO2) and water contents (H2Omelt) (Blundy & Holland, 1990; Johnson & Rutherford, 1989). In this study, the magma crystallization conditions of granodiorites samples (Table S2) were estimated using amphibole calibration methods from Blundy & Holland (1990) for T, Anderson & Smith (1995) for P, Ridolfi *et al.* (2010) and Scaillet & Evans (1999) for fO2, and Ridolfi *et al.* (2010) for H2Omelt.

The pressure of calcic amphibole crystallization in this study estimated by using the Al–in–amphibole geobarometer by Anderson & Smith (1995) (P–Amp). Application of the barometer to felsic plutonic rocks requires attention to details such as mineral assemblage (i.e., quartz + K–feldspar + plagioclase + hornblende + biotite + Fe–Ti oxide + titanite), temperature, and oxygen fugacity conditions. Except the few grains with (Ca + AlIV) = 1.84–2.46 apfu which were likely affected by later post–magmatic alteration, all analyzed amphibole compositions have (Ca + AlIV) = 2.52–3.10 apfu and are similar to those in the field of magmatic amphiboles (Ca + AlIV) > 2.50 apfu proposed by Giret *et al.* (1980). The magmatic amphiboles in this study exhibit both edenitic and tschermakitic substitutions (Fig.4h and i), and their compositional variability was likely controlled by both temperature and pressure (Anderson & Smith, 1995). The magmatic amphiboles show high Fe# values (Fe#=Fe/(Fe+Mg)mole, 0.47–0.53), corresponding to high oxygen fugacity conditions (Fe# < 0.6, Anderson & Smith, 1995). Moreover, given that the granitoids contain magnetite (Table S2), the chemistry of the studied magmatic amphiboles is suitable for reliable geobarometric calculations (Stein & Dietl, 2001). For the granodiorites from XHD, the calculated pressures vary from 0.87–2.93 kbar (P–Amp; mean=1.98 ± 0.003 kbar) (Fig. 9b and Table S6). For the granodiorite from PSC, the inferred pressure value is around 1.47 kbar (Fig. 9b and Table S6).

The estimated temperatures (T–Amp) for P–Amp pressures of hornblende–plagioclase pairs are inferred using plagioclase–hornblende geothermometer by Blundy & Holland (1990). For the granodiorites from XHD, the values range from 650 to 769 °C (mean=707 ± 2 °C). For the granodiorite from PSC, the value is around 744 °C (Fig. 9a and Table S6).

In Scaillet & Evans (1999)’s model, the oxygen fugacities (fO2–S) calculated using magmatic amphiboles range from △NNO–0.92 to △NNO+0.82 in granodiorites from XHD, and around △NNO–0.52 in granodiorite from PSC (Table S6). Moreover, we also calculated the oxygen fugacities of amphiboles using the equation of Ridolfi *et al.* (2010). The results are similar (fO2–R, △NNO+0.02 to △NNO+0.86 of granodiorites in XHD, and around △NNO+0.22 of granodiorite in PSC) to Scaillet & Evans (1999)’s model (Fig. 9c and Table S6). The oxygen fugacity obtained using the composition of magmatic amphiboles is much higher and concentrated when compared to the values obtained using zircon compositions.

Based on the hygrometric equation provided by Ridolfi *et al.* (2010), the calculated H2Omelt values are between 4.5 and 6 wt.% for granodiorites from XHD, and around 5 wt.% for the granodiorite from PSC. These values are consistent with the results of an experimental study on granites from eastern Amazonian Craton, which have found that amphibole–magnetite–plagioclase mineral assemblages may be produced in magmas with initial H2O content between 4.5 and 6.5 wt.% (Dall’Agnol *et al.,* 1999). The water contents inferred by the amphibole in this study show that most of the related melts have been significantly water–saturated, based on the criteria (5.5–6.5 wt.% and less than 5.0 wt. % to water–saturated and under–saturated melts, respectively) from Gardner *et al.* (1995). Thus, during the crystallization of amphibole, the corresponding granitic magma was water–saturated.

**Biotite**

Composition of biotite can be useful to determine crystallization conditions (such as T, P, fO2) of magmatic and metamorphic rocks (Wones & Eugster, 1965). The calculated pressures (P–Bt) of biotite crystallization were obtained using the empirical equation of Uchida *et al.* (2007) based on Altotal cation content in biotite, ranging from 0.43 to 1.14 kbar (mean=0.70 ± 0.002 kbar) in granodiorites from XHD, and around 0.92 kbar in granodiorite from PSC (Fig. 9b and Table S6). The inferred temperature (T–Bt) of biotite crystals are between 771 and 799 °C (mean=789 ± 0.3 °C) in granodiorites from XHD and around 797 °C in granodiorite from PSC (Fig. 9a and Table S6), based on the calibrated equation provided by Henry *et al.* (2005). From the calibrated equation of Wones & Eugster (1965), the estimated fO2 of biotite crystals range from △NNO – 0.10 to △NNO + 0.01 in granodiorites from XHD, and around △NNO + 0 in granodiorite from PSC (Fig. 9c and Table S6).

**Feldspar**

In this study, the whole rock major element data of studied granitic rocks from XHD and PSC (Table S4), combined with major element contents of feldspar (Table S2), are also used to calculate the crystallization conditions (e.g. T and H2Omelt). The plagioclase–liquid thermobarometer using the model of Putirka (2008), resulted in equilibrated values (KD(Ab–An)) out of the predicted range (e.g. 0.15–2.38 of samples and 0.1±0.05 of reference standard), therefore suggesting disequilibrium (Table S6). Plagioclase is usually an early and dominant phase in granitic magmas (Winter, 2009, p. 396), therefore the inconsistency could be due to the more evolved composition of granitic magma used in the calculation. The K–feldspar–liquid thermobarometer using Putirka (2008)’s model, the inferred temperature (T–Kf) of K–feldspar crystals to be between 402 and 651 °C (mean=514 ± 1 °C) in granodiorites from XHD, around 551 °C in the biotite granite, and 586 and 661 °C (mean=623 ± 26 °C) in granodiorites from PSC (Fig. 9a and Table S6).

**Reference**

**Anderson JL and Smith DR** (1995) The effects of temperature and fO2 on the Al–in–hornblende barometer. *American Mineralogist* **80**, 549–559.

**Ballard JR, Palin JM and Campbell IH** (2002), Relative oxidation states of magmas inferred from Ce(IV)/Ce(III) in zircon: application to porphyry copper deposits of northern Chile. *Contributions to Mineralogy and Petrology* **144**, 347–364.

**Blundy JD and Holland TJ** (1990) Calcic amphibole equilibria and a new amphibole–plagioclase geothermometer. *Contributions to Mineralogy and Petrology* **104**, 208–224.

**Blundy J and Wood B** (1994) Prediction of crystal–melt partition coefficients from elastic moduli. *Nature* **372**, 452–454.

**Dall’Agnol R, Scaillet B and Pichavant M** (1999) An experimental study of a lower Proterozoic A–type granite from the Eastern Amazonian Craton, Brazil. *Journal of Petrology* **40**, 1673–1698.

**Ferry J and Watson E** (2007), New thermodynamic models and revised calibrations for the Ti–in–zircon and Zr–in–rutile thermometers. *Contributions to Mineralogy and Petrology* **154**, 429–437.

**Giret A, Bonin B and Leger JM** (1980) Amphibole compositional trends in oversaturated and undersaturated alkaline plutonic ring complexes. *The Canadian Mineralogist* **18**, 481–495.

**Henry DJ, Guidotti CV and Thomson JA** (2005) The Ti–saturation surface for low–to–medium pressure metapelitic biotites: Implications for geothermometry and Ti–substitution mechanisms. *American Mineralogist* **90**, 316–328.

**Johnson MC and Rutherford MJ** (1989) Experimental calibration of the aluminum–in–hornblende geobarometer with application to Long Valley caldera (California) volcanic rocks. *Geology* **17**, 837–841.

**Miller CF, McDowell SM and Mapes RW** (2003), Hot and cold granites? Implications of zircon saturation temperatures and preservation of inheritance. *Geology* **31**, 529–532.

**Putirka KD** (2008) Thermometers and barometers for volcanic systems. *Reviews in Mineralogy and Geochemistry* **69**, 61–120.

**Qiu JT, Yu XQ, Santosh M, Zhang DH, Chen SQ and Li** **PJ** (2013) Geochronology and magmatic oxygen fugacity of the Tongcun molybdenum deposit, northwest Zhejiang, SE China. *Mineralium Deposita* **48**, 545–556.

**Ridolfi, F., A. Renzulli, and M. Puerini** (2010) Stability and chemical equilibrium of amphibole in calc–alkaline magmas: An overview, new thermobarometric formulations and application to subduction–related volcanoes. *Contributions to Mineralogy and Petrology* **160**, 45–66.

**Scaillet B and Evans BW** (1999) The 15 June 1991 Eruption of Mount Pinatubo. I. Phase Equilibria and Pre–eruption P–T–fO2–fH2O Conditions of the Dacite Magma.*Journal of Petrology* **40**, 381–411.

**Smythe DJ and Brenan JM** (2015) Cerium oxidation state in silicate melts: combined fO2, temperature and compositional effects. *Geochimica et Cosmochimica Acta* **170**, 173–187.

**Stein E and Dietl C** (2001) Hornblende thermobarometry of granitoids from the Central Odenwald (Germany) and their implications for the geotectonic development of the Odenwald. *Mineralogy and Petrology* **72**, 185–207.

**Trail D, Watson EB and Tailby ND**  (2012) Ce and Eu anomalies in zircon as proxies for the oxidation state of magmas. *Geochimica et Cosmochimica Acta* **97**, 70–87.

**Uchida E, Endo S and Makino M** (2007) Relationship Between Solidification Depth of Granitic Rocks and Formation of Hydrothermal Ore Deposits. *Resource Geology* **57**, 47–56.

**Wang FY, Liu SA, Li S and He YS** (2013c) Contrasting zircon Hf–O isotopes and trace elements between ore–bearing and ore–barren adakitic rocks in central–eastern China: implications for genetic relation to Cu–Au mineralization. *Lithos* **156–159**, 97–111.

**Watson EB and Harrison TM** (1983) Zircon saturation revisited: Temperature and composition effects in a variety of crustal magma types. *Earth and Planetary Science Letters* **64**, 295–304.

**Watson EB and Harrison TM** (2005) Zircon Thermometer Reveals Minimum Melting Conditions on Earliest Earth. *Science* **308**, 841–844.

**Watson EB, Wark DA andThomas JB** (2006) Crystallization thermometers for zircon and rutile. *Contributions to Mineralogy and Petrology* **151**, 413–433.

**Whalen JB, Currie KL and Chappell BW** (1987) A–type granites: Geochemical characteristics, discrimination and petrogenesis. *Contributions to Mineralogy and Petrology* **95**, 407–419.

**Wones DR and Eugster HP** (1965) Stability of biotite: experiment, theory, and application. *The American Mineralogist* **50**, 1228–1272.

**Zhang CC, Sun WD, Wang JT, Zhang L, Sun SJ and Wu K** (2017) Oxygen fugacity and porphyry mineralization: a zircon perspective of Dexing porphyry Cu deposit, China. *Geochimica et Cosmochimica Acta* **206**, 343–363

**Figure S1:** **the site with enclaves exposed (red star) and outcrop photographs.**


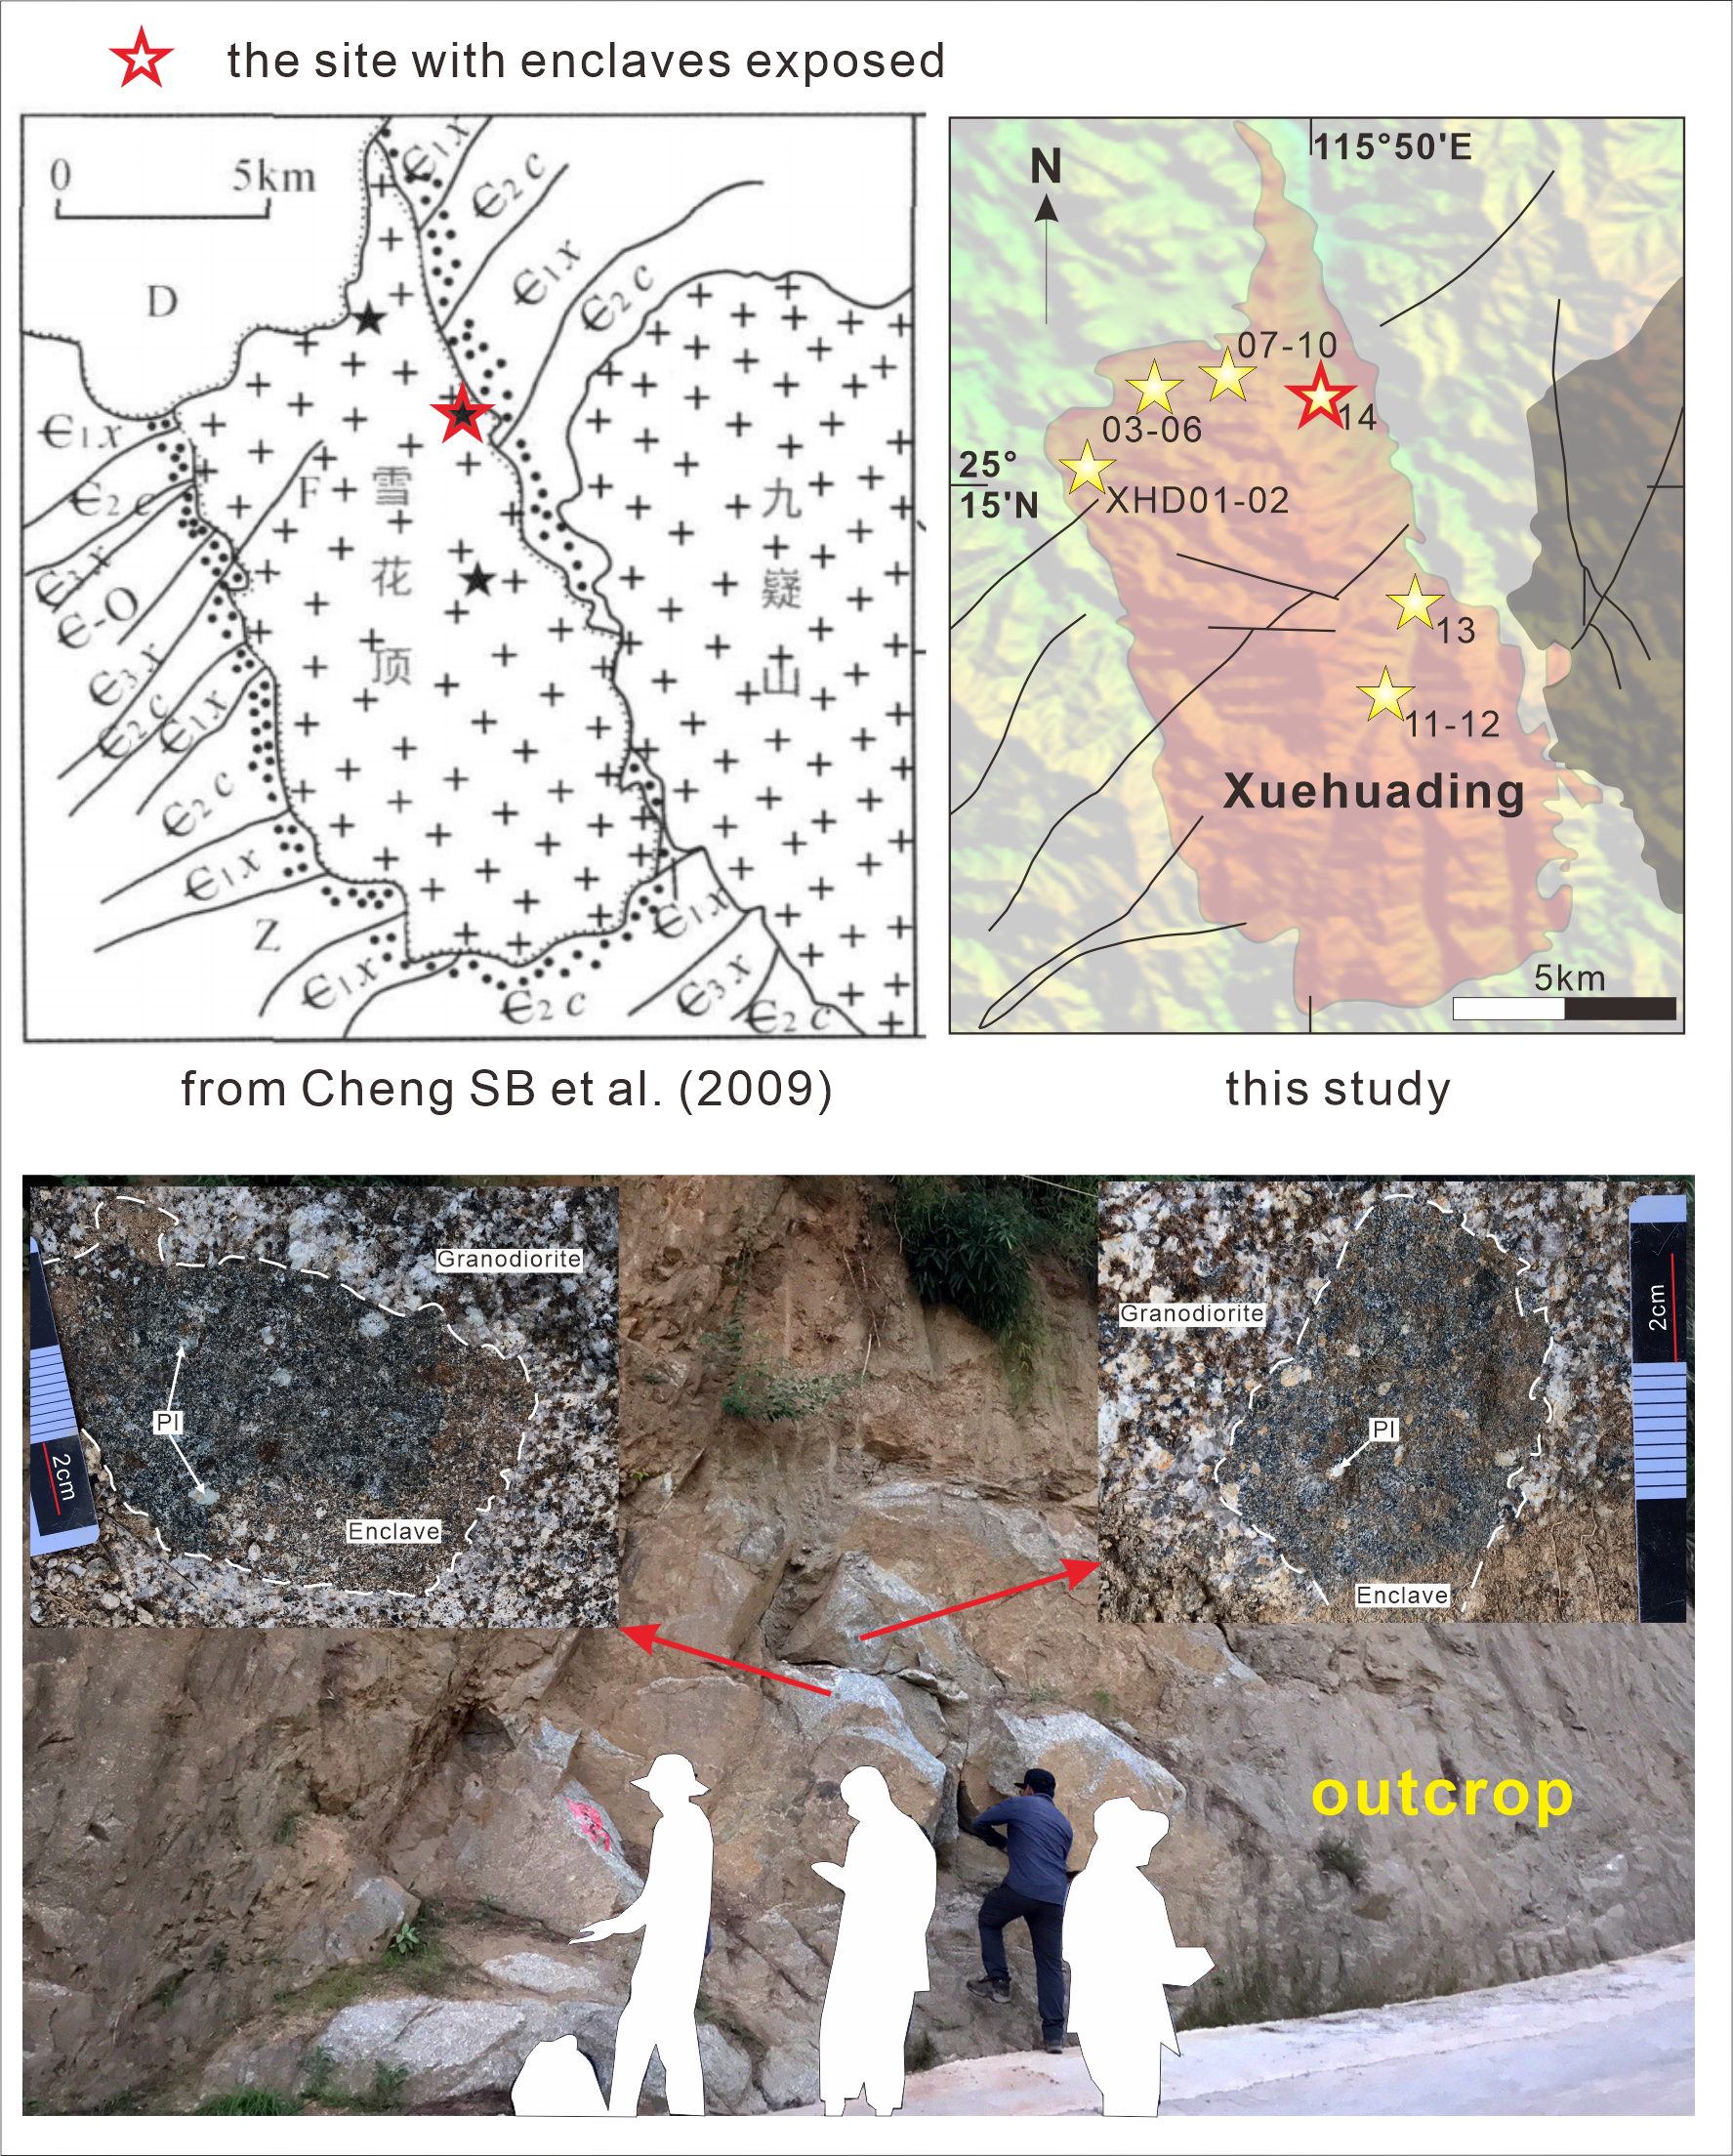


**Figure S2**


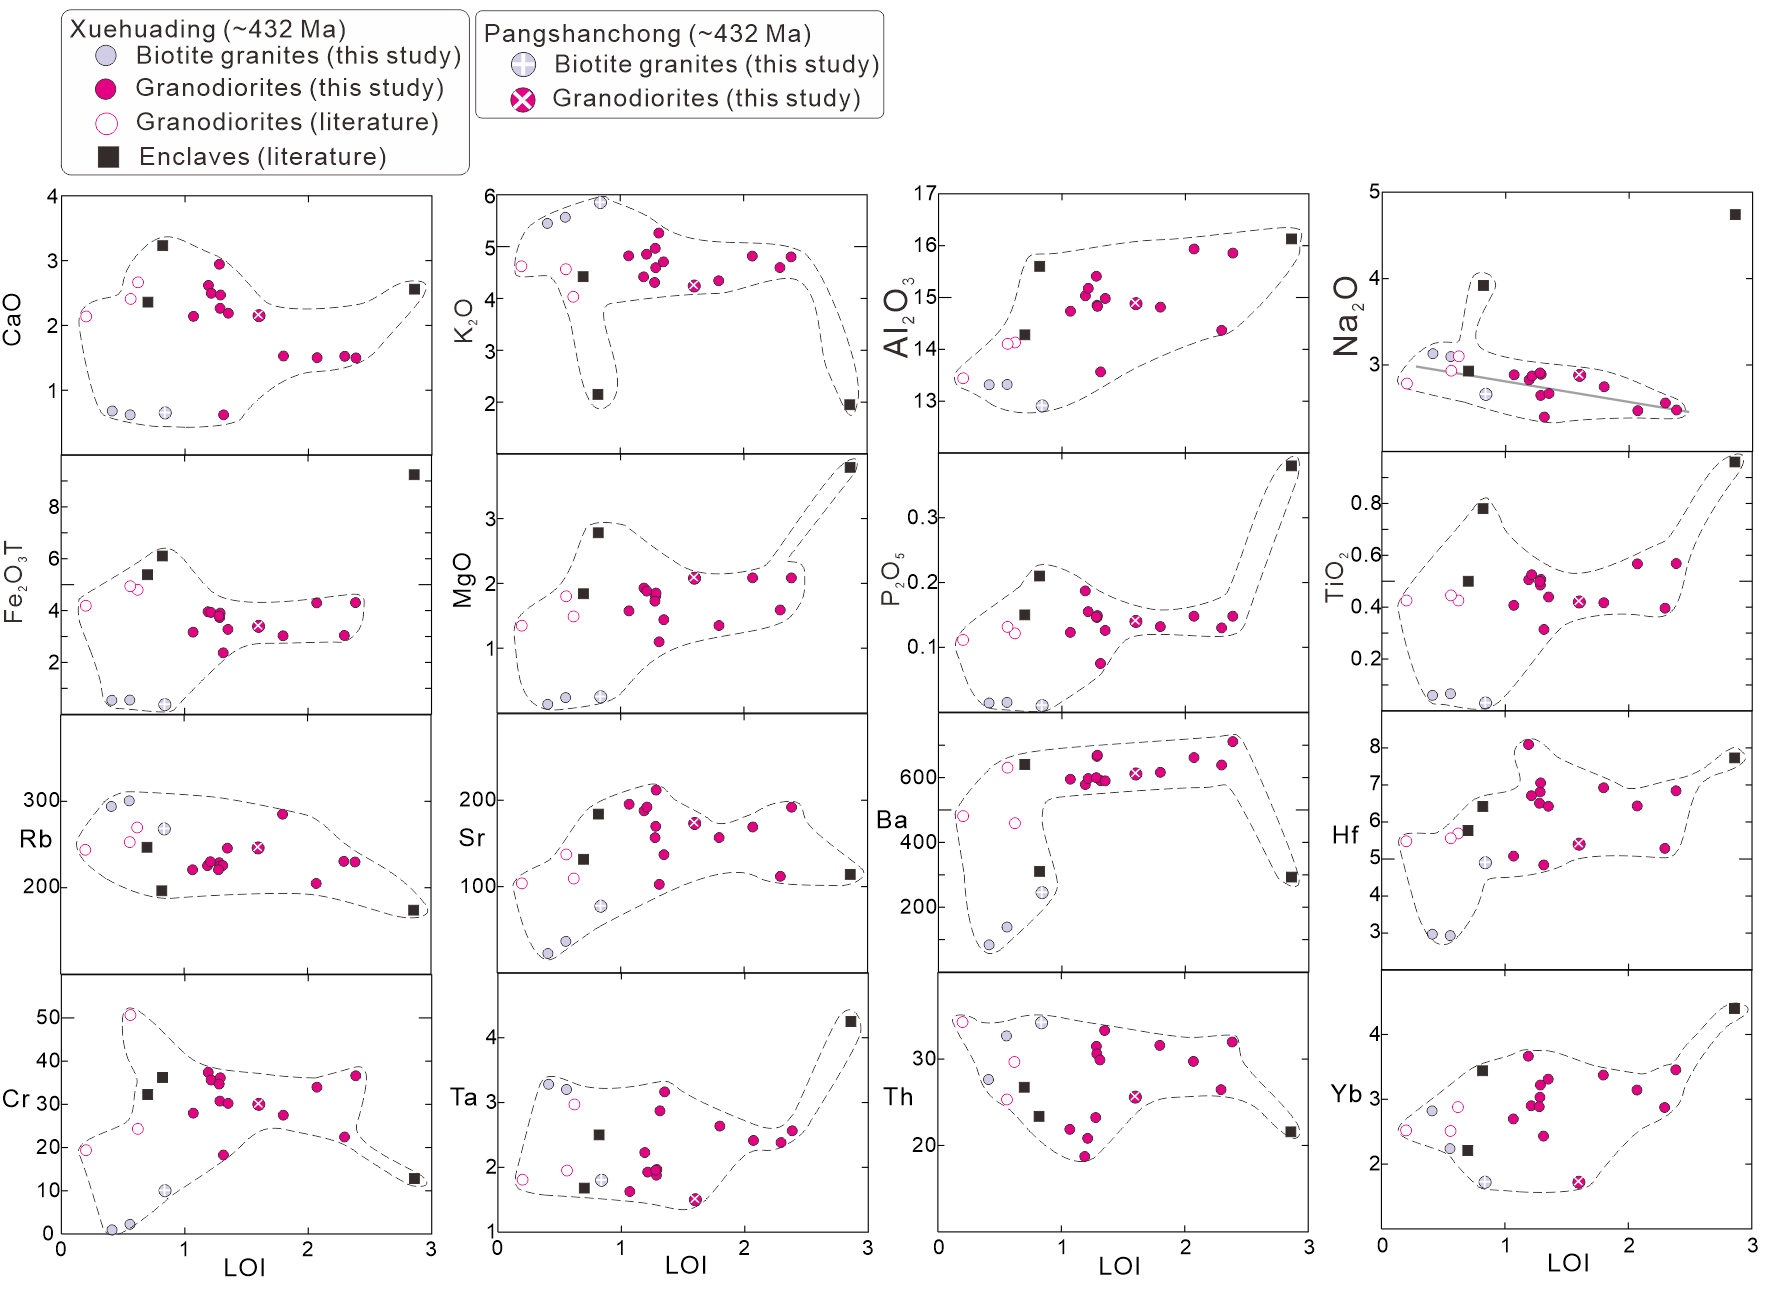


Table S1. LA-ICP-MS U–Pb zircon data of the granitic rocks in the Xuehuading-Pangshanchong area, South China Block.

| Sample spot | Th (ppm) | U (ppm) | Th/U | 207Pb/206Pb | | 207Pb/235U | | 206Pb/238U | | 207Pb/206Pb (Ma) | | 207Pb/235U (Ma) | | 206Pb/238U (Ma) | | Common 206Pb  (%) |
| --- | --- | --- | --- | --- | --- | --- | --- | --- | --- | --- | --- | --- | --- | --- | --- | --- |
| Ratio | 1σ | Ratio | 1σ | Ratio | 1σ | Age | 1σ | Age | 1σ | Age | 1σ |
| 17XHD06 Granodiorite | | | |  |  |  |  |  |  |  |  |  |  |  |  |  |
| 01 | 515 | 1228 | 0.42 | 0.05619 | 0.00081 | 0.53816 | 0.00823 | 0.06935 | 0.00075 | 460 | 16 | 437 | 5 | 432 | 5 |  |
| 02 | 738 | 1711 | 0.43 | 0.05458 | 0.00067 | 0.52402 | 0.00825 | 0.06934 | 0.00081 | 395 | 17 | 428 | 5 | 432 | 5 |  |
| 03 | 604 | 2077 | 0.29 | 0.05527 | 0.00071 | 0.52942 | 0.00789 | 0.06938 | 0.00084 | 423 | 15 | 431 | 5 | 432 | 5 |  |
| 04 | 534 | 1987 | 0.27 | 0.05600 | 0.00070 | 0.53717 | 0.00789 | 0.06938 | 0.00077 | 453 | 15 | 437 | 5 | 432 | 5 |  |
| 05 | 376 | 1294 | 0.29 | 0.05582 | 0.00077 | 0.53597 | 0.01051 | 0.06925 | 0.00096 | 445 | 21 | 436 | 7 | 432 | 6 |  |
| 06 | 169 | 570 | 0.30 | 0.06354 | 0.00111 | 0.93875 | 0.02872 | 0.10572 | 0.00249 | 726 | 30 | 672 | 15 | 648 | 15 | 0.22 |
| 07 | 621 | 912 | 0.68 | 0.05525 | 0.00163 | 0.53041 | 0.01835 | 0.06935 | 0.00151 | 422 | 41 | 432 | 12 | 432 | 9 |  |
| 08 | 454 | 1852 | 0.25 | 0.05696 | 0.00084 | 0.54651 | 0.00937 | 0.06947 | 0.00087 | 490 | 18 | 443 | 6 | 433 | 5 |  |
| 09 | 644 | 1680 | 0.38 | 0.05723 | 0.00080 | 0.54970 | 0.00945 | 0.06941 | 0.00081 | 500 | 19 | 445 | 6 | 433 | 5 |  |
| 10 | 336 | 1167 | 0.29 | 0.05494 | 0.00154 | 0.52419 | 0.01334 | 0.06920 | 0.00083 | 410 | 64 | 428 | 9 | 431 | 5 | 0.33 |
| 11 | 410 | 1095 | 0.37 | 0.05599 | 0.00156 | 0.53279 | 0.01329 | 0.06901 | 0.00085 | 452 | 63 | 434 | 9 | 430 | 5 | 0.34 |
| 12 | 1009 | 2566 | 0.39 | 0.05884 | 0.00405 | 0.56387 | 0.05580 | 0.06905 | 0.00213 | 561 | 163 | 454 | 36 | 430 | 13 |  |
| 13 | 394 | 1257 | 0.31 | 0.06024 | 0.00183 | 0.57783 | 0.02075 | 0.06930 | 0.00147 | 612 | 42 | 463 | 13 | 432 | 9 | -0.06 |
| 14 | 516 | 1715 | 0.30 | 0.05546 | 0.00077 | 0.53027 | 0.00847 | 0.06927 | 0.00083 | 431 | 17 | 432 | 6 | 432 | 5 |  |
| 15 | 509 | 1837 | 0.28 | 0.05580 | 0.00084 | 0.53361 | 0.00971 | 0.06927 | 0.00096 | 444 | 19 | 434 | 6 | 432 | 6 |  |
| 16 | 598 | 1782 | 0.34 | 0.06654 | 0.00182 | 0.64530 | 0.02650 | 0.07002 | 0.00111 | 823 | 59 | 506 | 16 | 436 | 7 |  |
| 17 | 649 | 2009 | 0.32 | 0.05597 | 0.00076 | 0.53446 | 0.00878 | 0.06927 | 0.00092 | 451 | 17 | 435 | 6 | 432 | 6 |  |
| 18 | 687 | 1799 | 0.38 | 0.05473 | 0.00075 | 0.52421 | 0.00853 | 0.06935 | 0.00080 | 401 | 18 | 428 | 6 | 432 | 5 |  |
| 19 | 741 | 1593 | 0.47 | 0.05460 | 0.00075 | 0.52342 | 0.00836 | 0.06947 | 0.00082 | 396 | 17 | 427 | 6 | 433 | 5 |  |
| 20 | 627 | 1920 | 0.33 | 0.05595 | 0.00081 | 0.53508 | 0.00907 | 0.06928 | 0.00085 | 450 | 18 | 435 | 6 | 432 | 5 |  |
| 17XHD08 Granodiorite | | | |  |  |  |  |  |  |  |  |  |  |  |  |  |
| 01 | 629 | 2152 | 0.29 | 0.05589 | 0.00073 | 0.53571 | 0.00853 | 0.06932 | 0.00085 | 448 | 17 | 436 | 6 | 432 | 5 |  |
| 02 | 653 | 1859 | 0.35 | 0.05489 | 0.00127 | 0.52397 | 0.01088 | 0.06923 | 0.00069 | 408 | 53 | 428 | 7 | 432 | 4 | 0.18 |
| 03 | 782 | 2237 | 0.35 | 0.05669 | 0.00067 | 0.54401 | 0.00771 | 0.06932 | 0.00068 | 480 | 15 | 441 | 5 | 432 | 4 |  |
| 04 | 790 | 1119 | 0.71 | 0.05527 | 0.00481 | 0.52114 | 0.04094 | 0.06848 | 0.00451 | 423 | 79 | 426 | 27 | 427 | 27 |  |
| 05 | 663 | 1890 | 0.35 | 0.05744 | 0.00074 | 0.54978 | 0.00781 | 0.06938 | 0.00080 | 508 | 14 | 445 | 5 | 432 | 5 |  |
| 06 | 265 | 755 | 0.35 | 0.05768 | 0.00094 | 0.66457 | 0.01463 | 0.08301 | 0.00120 | 518 | 25 | 517 | 9 | 514 | 7 |  |
| 07 | 325 | 1325 | 0.25 | 0.05649 | 0.00093 | 0.54262 | 0.01075 | 0.06941 | 0.00096 | 472 | 22 | 440 | 7 | 433 | 6 | 0.13 |
| 08 | 1058 | 2759 | 0.38 | 0.06309 | 0.00246 | 0.60153 | 0.01928 | 0.06902 | 0.00171 | 711 | 32 | 478 | 12 | 430 | 10 |  |
| 09 | 306 | 1199 | 0.26 | 0.05761 | 0.00096 | 0.55340 | 0.01060 | 0.06939 | 0.00086 | 515 | 22 | 447 | 7 | 432 | 5 |  |
| 10 | 509 | 1422 | 0.36 | 0.05738 | 0.00080 | 0.55067 | 0.00890 | 0.06930 | 0.00073 | 506 | 18 | 445 | 6 | 432 | 4 |  |
| 11 | 524 | 1736 | 0.30 | 0.05710 | 0.00076 | 0.54822 | 0.00981 | 0.06950 | 0.00108 | 495 | 18 | 444 | 6 | 433 | 6 |  |
| 12 | 919 | 1568 | 0.59 | 0.07179 | 0.00262 | 0.69163 | 0.02690 | 0.06955 | 0.00107 | 980 | 54 | 534 | 16 | 433 | 6 |  |
| 13 | 255 | 424 | 0.60 | 0.05592 | 0.00111 | 0.53639 | 0.01144 | 0.06936 | 0.00074 | 449 | 29 | 436 | 8 | 432 | 4 |  |
| 14 | 611 | 1986 | 0.31 | 0.05656 | 0.00076 | 0.53944 | 0.00816 | 0.06897 | 0.00072 | 474 | 17 | 438 | 5 | 430 | 4 |  |
| 15 | 914 | 2237 | 0.41 | 0.05779 | 0.00077 | 0.52343 | 0.00838 | 0.06539 | 0.00071 | 522 | 18 | 427 | 6 | 408 | 4 |  |
| 16 | 465 | 1478 | 0.31 | 0.05790 | 0.00089 | 0.55408 | 0.00947 | 0.06922 | 0.00078 | 526 | 19 | 448 | 6 | 431 | 5 |  |
| 17 | 338 | 1306 | 0.26 | 0.05539 | 0.00150 | 0.52867 | 0.01313 | 0.06922 | 0.00074 | 428 | 62 | 431 | 9 | 431 | 4 | 0.22 |
| 18 | 243 | 425 | 0.57 | 0.10414 | 0.00227 | 4.04412 | 0.07636 | 0.28165 | 0.00308 | 1699 | 41 | 1643 | 15 | 1600 | 15 | 0.26 |
| 19 | 657 | 2001 | 0.33 | 0.05953 | 0.00390 | 0.56586 | 0.02978 | 0.06894 | 0.00268 | 586 | 146 | 455 | 19 | 430 | 16 | 0.47 |
| 20 | 302 | 1198 | 0.25 | 0.05529 | 0.00080 | 0.52989 | 0.00910 | 0.06937 | 0.00083 | 424 | 19 | 432 | 6 | 432 | 5 |  |

Table S1. (continued)

| Sample spot | Th (ppm) | U (ppm) | Th/U | 207Pb/206Pb | | 207Pb/235U | | 206Pb/238U | | 207Pb/206Pb (Ma) | | 207Pb/235U (Ma) | | 206Pb/238U (Ma) | | Common 206Pb  (%) |
| --- | --- | --- | --- | --- | --- | --- | --- | --- | --- | --- | --- | --- | --- | --- | --- | --- |
| Ratio | 1σ | Ratio | 1σ | Ratio | 1σ | Age | 1σ | Age | 1σ | Age | 1σ |
| 17XHD12 Biotite granite | | | |  |  |  |  |  |  |  |  |  |  |  |  |  |
| 01 | 690 | 1709 | 0.40 | 0.05456 | 0.00168 | 0.52115 | 0.01588 | 0.06932 | 0.00131 | 394 | 36 | 426 | 11 | 432 | 8 |  |
| 02 | 923 | 2001 | 0.46 | 0.06214 | 0.00087 | 0.59510 | 0.01187 | 0.06933 | 0.00105 | 679 | 20 | 474 | 8 | 432 | 6 |  |
| 03 | 665 | 1622 | 0.41 | 0.05592 | 0.00071 | 0.53491 | 0.00805 | 0.06928 | 0.00068 | 449 | 17 | 435 | 5 | 432 | 4 |  |
| 04 | 510 | 1736 | 0.29 | 0.05535 | 0.00073 | 0.52896 | 0.00858 | 0.06938 | 0.00087 | 426 | 17 | 431 | 6 | 432 | 5 |  |
| 05 | 1967 | 3108 | 0.63 | 0.06040 | 0.00141 | 0.58427 | 0.01972 | 0.06934 | 0.00077 | 618 | 54 | 467 | 13 | 432 | 5 |  |
| 06 | 903 | 2028 | 0.45 | 0.05743 | 0.00070 | 0.54952 | 0.00824 | 0.06938 | 0.00076 | 508 | 16 | 445 | 5 | 432 | 5 |  |
| 07 | 514 | 1341 | 0.38 | 0.05706 | 0.00075 | 0.54605 | 0.00827 | 0.06945 | 0.00074 | 494 | 16 | 442 | 5 | 433 | 4 |  |
| 08 | 634 | 2132 | 0.30 | 0.05508 | 0.00137 | 0.46463 | 0.01059 | 0.06118 | 0.00060 | 415 | 57 | 387 | 7 | 383 | 4 | 0.65 |
| 09 | 948 | 1511 | 0.63 | 0.05550 | 0.00321 | 0.51917 | 0.02914 | 0.06784 | 0.00094 | 433 | 132 | 425 | 19 | 423 | 6 | 2.19 |
| 10 | 738 | 1718 | 0.43 | 0.05731 | 0.00089 | 0.54760 | 0.01054 | 0.06930 | 0.00108 | 503 | 19 | 443 | 7 | 432 | 7 |  |
| 11 | 688 | 2032 | 0.34 | 0.05477 | 0.00267 | 0.51797 | 0.02455 | 0.06858 | 0.00078 | 403 | 112 | 424 | 16 | 428 | 5 | 1.06 |
| 12 | 678 | 1982 | 0.34 | 0.05614 | 0.00067 | 0.53780 | 0.00728 | 0.06943 | 0.00069 | 458 | 14 | 437 | 5 | 433 | 4 |  |
| 13 | 1401 | 2041 | 0.69 | 0.05964 | 0.00076 | 0.57205 | 0.00955 | 0.06937 | 0.00085 | 590 | 17 | 459 | 6 | 432 | 5 |  |
| 14 | 572 | 1412 | 0.41 | 0.05660 | 0.00078 | 0.54150 | 0.00847 | 0.06926 | 0.00075 | 476 | 17 | 439 | 6 | 432 | 5 |  |
| 15 | 1236 | 2166 | 0.57 | 0.06098 | 0.00087 | 0.58417 | 0.01120 | 0.06929 | 0.00111 | 638 | 19 | 467 | 7 | 432 | 7 |  |
| 16 | 1501 | 1028 | 1.46 | 0.05972 | 0.00112 | 0.57335 | 0.01203 | 0.06941 | 0.00082 | 593 | 26 | 460 | 8 | 433 | 5 |  |
| 17 | 762 | 2057 | 0.37 | 0.05772 | 0.00081 | 0.55348 | 0.00871 | 0.06932 | 0.00073 | 519 | 17 | 447 | 6 | 432 | 4 |  |
| 18 | 683 | 1695 | 0.40 | 0.06560 | 0.00097 | 0.63112 | 0.01199 | 0.06938 | 0.00083 | 794 | 21 | 497 | 7 | 432 | 5 |  |
| 19 | 1200 | 917 | 1.31 | 0.05776 | 0.00092 | 0.55274 | 0.00933 | 0.06930 | 0.00072 | 521 | 20 | 447 | 6 | 432 | 4 | -0.33 |
| ZK001-12 Granodiorite | | | |  |  |  |  |  |  |  |  |  |  |  |  |  |
| 01 | 940 | 2252 | 0.42 | 0.05535 | 0.00065 | 0.52991 | 0.00718 | 0.06935 | 0.00073 | 426 | 14 | 432 | 5 | 432 | 4 |  |
| 02 | 841 | 2168 | 0.39 | 0.05925 | 0.00212 | 0.56278 | 0.01848 | 0.06889 | 0.00099 | 576 | 80 | 453 | 12 | 429 | 6 | 0.43 |
| 03 | 1188 | 2582 | 0.46 | 0.05403 | 0.00085 | 0.51756 | 0.01003 | 0.06930 | 0.00095 | 372 | 21 | 424 | 7 | 432 | 6 |  |
| 04 | 1158 | 2592 | 0.45 | 0.05545 | 0.00068 | 0.53107 | 0.00833 | 0.06931 | 0.00080 | 430 | 17 | 433 | 6 | 432 | 5 |  |
| 05 | 1042 | 2414 | 0.43 | 0.05449 | 0.00071 | 0.52136 | 0.00785 | 0.06936 | 0.00076 | 391 | 16 | 426 | 5 | 432 | 5 |  |
| 06 | 1089 | 2922 | 0.37 | 0.05539 | 0.00084 | 0.53034 | 0.00941 | 0.06934 | 0.00077 | 428 | 21 | 432 | 6 | 432 | 5 |  |
| 07 | 453 | 2098 | 0.22 | 0.05218 | 0.00104 | 0.49971 | 0.01137 | 0.06943 | 0.00136 | 293 | 23 | 412 | 8 | 433 | 8 |  |
| 08 | 1182 | 1360 | 0.87 | 0.05575 | 0.00111 | 0.53525 | 0.01333 | 0.06941 | 0.00116 | 443 | 28 | 435 | 9 | 433 | 7 |  |
| 09 | 1430 | 3307 | 0.43 | 0.05662 | 0.00138 | 0.53853 | 0.01198 | 0.06887 | 0.00186 | 477 | 27 | 437 | 8 | 429 | 11 |  |
| 10 | 1046 | 1463 | 0.72 | 0.05550 | 0.00073 | 0.53432 | 0.00846 | 0.06970 | 0.00078 | 432 | 17 | 435 | 6 | 434 | 5 |  |
| 11 | 1036 | 2502 | 0.41 | 0.05775 | 0.00074 | 0.55433 | 0.00882 | 0.06931 | 0.00071 | 520 | 18 | 448 | 6 | 432 | 4 |  |
| 12 | 961 | 2449 | 0.39 | 0.05577 | 0.00076 | 0.53489 | 0.00867 | 0.06937 | 0.00081 | 443 | 17 | 435 | 6 | 432 | 5 |  |
| 13 | 1574 | 3273 | 0.48 | 0.05621 | 0.00079 | 0.53926 | 0.00960 | 0.06934 | 0.00098 | 461 | 18 | 438 | 6 | 432 | 6 | 0.14 |
| 14 | 1251 | 2945 | 0.42 | 0.05962 | 0.00169 | 0.57353 | 0.01181 | 0.06962 | 0.00143 | 590 | 20 | 460 | 8 | 434 | 9 | 0.06 |
| 15 | 1013 | 2965 | 0.34 | 0.05643 | 0.00074 | 0.53976 | 0.00812 | 0.06917 | 0.00074 | 469 | 16 | 438 | 5 | 431 | 4 |  |
| 16 | 1816 | 3032 | 0.60 | 0.05747 | 0.00224 | 0.54579 | 0.01129 | 0.06898 | 0.00263 | 510 | 48 | 442 | 7 | 430 | 16 |  |
| 17 | 1075 | 2443 | 0.44 | 0.05584 | 0.00072 | 0.53487 | 0.00754 | 0.06932 | 0.00069 | 446 | 15 | 435 | 5 | 432 | 4 |  |
| 18 | 1636 | 3035 | 0.54 | 0.05842 | 0.00124 | 0.56214 | 0.01676 | 0.06941 | 0.00091 | 546 | 42 | 453 | 11 | 433 | 6 |  |
| 19 | 1353 | 2672 | 0.51 | 0.05582 | 0.00074 | 0.53492 | 0.00825 | 0.06937 | 0.00086 | 445 | 16 | 435 | 5 | 432 | 5 |  |
| 20 | 1036 | 2705 | 0.38 | 0.05631 | 0.00080 | 0.53900 | 0.00866 | 0.06931 | 0.00077 | 464 | 18 | 438 | 6 | 432 | 5 |  |
| 21 | 1130 | 2385 | 0.47 | 0.05565 | 0.00079 | 0.52251 | 0.00841 | 0.06791 | 0.00070 | 439 | 19 | 427 | 6 | 424 | 4 |  |
| 22 | 788 | 2493 | 0.32 | 0.05542 | 0.00074 | 0.52856 | 0.00802 | 0.06899 | 0.00074 | 429 | 17 | 431 | 5 | 430 | 4 |  |

Table S2. Representative electron microprobe analyses of mica, amphibole, feldspar, and Fe-Ti oxides of granitic rocks in the Xuehuading-Pangshanchong area, South China Block.

| Sample | 17XHD01 |  |  |  |  | 17XHD02 |  |  | 17XHD03 | 17XHD04 |
| --- | --- | --- | --- | --- | --- | --- | --- | --- | --- | --- |
| Mineral | Bt | Bt | Bt | Bt | Bt | Bt | Bt | Bt | Bt | Bt |
| Spots | 17XHD01-C1-09 | 17XHD01-C1-10 | 17XHD01-C1-11 | 17XHD01-C2-01 | 17XHD01-C2-02 | 17XHD02-C1-04 | 17XHD02-C1-05 | 17XHD02-C1-06 | 17XHD03-C1-03 | 17XHD04-C1-01 |
| SiO2 | 36.47 | 35.98 | 36.31 | 36.97 | 35.80 | 36.12 | 36.14 | 36.33 | 35.07 | 36.52 |
| TiO2 | 3.90 | 4.19 | 4.13 | 3.92 | 3.83 | 4.05 | 4.03 | 4.00 | 3.40 | 3.84 |
| Al2O3 | 13.32 | 13.29 | 13.15 | 12.76 | 13.81 | 13.30 | 12.71 | 12.96 | 13.45 | 12.45 |
| FeO | 21.89 | 21.80 | 21.68 | 20.73 | 21.75 | 22.05 | 22.23 | 22.02 | 23.32 | 21.75 |
| MnO | 0.35 | 0.31 | 0.31 | 0.32 | 0.31 | 0.31 | 0.32 | 0.34 | 0.35 | 0.33 |
| MgO | 9.91 | 9.83 | 9.89 | 9.34 | 9.89 | 9.83 | 9.85 | 9.86 | 10.27 | 9.34 |
| CaO | 0.00 | 0.00 | 0.00 | 0.09 | 0.02 | 0.00 | 0.01 | 0.00 | 0.00 | 0.07 |
| Na2O | 0.01 | 0.00 | 0.00 | 0.02 | 0.03 | 0.04 | 0.00 | 0.03 | 0.02 | 0.01 |
| K2O | 9.38 | 9.41 | 9.58 | 8.96 | 9.32 | 9.38 | 9.09 | 9.30 | 7.80 | 9.26 |
| F | 0.25 | 0.21 | 0.19 | 0.31 | 0.26 | 0.23 | 0.26 | 0.30 | 0.19 | 0.28 |
| Cl | 0.07 | 0.06 | 0.07 | 0.08 | 0.06 | 0.05 | 0.07 | 0.07 | 0.07 | 0.09 |
| Total | 95.41 | 94.98 | 95.21 | 93.34 | 94.96 | 95.27 | 94.59 | 95.07 | 93.85 | 93.81 |
| Cations on the basis of 11 oxygens | | |  |  |  |  |  |  |  |  |
| Si | 2.822 | 2.801 | 2.819 | 2.898 | 2.784 | 2.805 | 2.827 | 2.825 | 2.765 | 2.874 |
| AlⅣ | 1.178 | 1.199 | 1.181 | 1.102 | 1.216 | 1.195 | 1.172 | 1.175 | 1.235 | 1.126 |
| AlⅥ | 0.036 | 0.020 | 0.022 | 0.077 | 0.050 | 0.023 | 0.000 | 0.012 | 0.015 | 0.030 |
| Ti | 0.227 | 0.246 | 0.241 | 0.231 | 0.224 | 0.237 | 0.237 | 0.234 | 0.202 | 0.228 |
| Fe3+ | 0.227 | 0.218 | 0.216 | 0.314 | 0.213 | 0.214 | 0.232 | 0.230 | 0.225 | 0.255 |
| Fe2+ | 1.190 | 1.201 | 1.192 | 1.046 | 1.202 | 1.218 | 1.222 | 1.201 | 1.313 | 1.177 |
| Mn | 0.023 | 0.021 | 0.020 | 0.021 | 0.021 | 0.021 | 0.021 | 0.022 | 0.023 | 0.022 |
| Mg | 1.143 | 1.141 | 1.144 | 1.092 | 1.147 | 1.138 | 1.148 | 1.143 | 1.208 | 1.096 |
| Ca | 0.000 | 0.000 | 0.000 | 0.008 | 0.001 | 0.000 | 0.001 | 0.000 | 0.000 | 0.006 |
| Na | 0.002 | 0.000 | 0.000 | 0.002 | 0.004 | 0.006 | 0.000 | 0.005 | 0.004 | 0.002 |
| K | 0.926 | 0.935 | 0.949 | 0.896 | 0.925 | 0.930 | 0.907 | 0.923 | 0.785 | 0.930 |
| Total | 7.773 | 7.782 | 7.784 | 7.686 | 7.787 | 7.786 | 7.768 | 7.770 | 7.775 | 7.745 |
| AlⅥ+Fe3++Ti | 0.490 | 0.485 | 0.479 | 0.622 | 0.488 | 0.473 | 0.469 | 0.476 | 0.442 | 0.512 |
| Fe2++Mn | 1.212 | 1.221 | 1.212 | 1.067 | 1.222 | 1.239 | 1.243 | 1.224 | 1.336 | 1.199 |
| Mg/(Mg+Fe2+) | 0.49 | 0.49 | 0.49 | 0.51 | 0.49 | 0.48 | 0.48 | 0.49 | 0.48 | 0.48 |

Table S2. (continued)

| Sample | 17XHD04 | 17XHD06 |  | 17XHD13 |  |  |  |  |  |  |
| --- | --- | --- | --- | --- | --- | --- | --- | --- | --- | --- |
| Mineral | Bt | Bt | Bt | Bt | Bt | Bt | Bt | Bt | Bt | Bt |
| Spots | 17XHD04-C1-02 | 17XHD06-C1-02 | 17XHD06-C2-02 | 17XHD13-C1-04 | 17XHD13-C1-05 | 17XHD13-C1-06 | 17XHD13-C1-07 | 17XHD13-C1-08 | 17XHD13-C1-09 | 17XHD13-C1-10 |
| SiO2 | 36.03 | 36.31 | 36.11 | 36.25 | 36.23 | 36.70 | 36.17 | 36.24 | 36.58 | 36.59 |
| TiO2 | 4.09 | 4.01 | 4.23 | 3.82 | 3.96 | 4.17 | 4.09 | 4.09 | 3.94 | 4.22 |
| Al2O3 | 13.03 | 13.35 | 13.12 | 13.14 | 13.24 | 12.73 | 13.00 | 12.98 | 13.04 | 12.80 |
| FeOT | 22.38 | 21.49 | 22.15 | 23.59 | 23.79 | 22.85 | 23.74 | 23.51 | 23.14 | 23.12 |
| MnO | 0.27 | 0.31 | 0.33 | 0.34 | 0.38 | 0.34 | 0.36 | 0.34 | 0.37 | 0.36 |
| MgO | 9.41 | 10.14 | 9.64 | 9.55 | 9.29 | 9.29 | 9.37 | 9.29 | 9.10 | 9.50 |
| CaO | 0.03 | 0.00 | 0.00 | 0.00 | 0.00 | 0.01 | 0.00 | 0.00 | 0.11 | 0.00 |
| Na2O | 0.01 | 0.04 | 0.01 | 0.05 | 0.07 | 0.08 | 0.07 | 0.09 | 0.10 | 0.06 |
| K2O | 9.31 | 9.16 | 9.53 | 9.28 | 9.76 | 9.27 | 9.40 | 9.53 | 9.10 | 9.75 |
| F | 0.23 | 0.21 | 0.19 | 0.19 | 0.30 | 0.36 | 0.21 | 0.24 | 0.28 | 0.29 |
| Cl | 0.09 | 0.08 | 0.07 | 0.03 | 0.04 | 0.05 | 0.03 | 0.05 | 0.05 | 0.04 |
| Total | 94.76 | 94.98 | 95.28 | 96.16 | 96.92 | 95.73 | 96.33 | 96.25 | 95.67 | 96.59 |
| Cations on the basis of 11 oxygens | | |  |  |  |  |  |  |  |  |
| Si | 2.818 | 2.815 | 2.809 | 2.808 | 2.793 | 2.842 | 2.802 | 2.808 | 2.837 | 2.820 |
| AlⅣ | 1.182 | 1.185 | 1.191 | 1.192 | 1.203 | 1.158 | 1.186 | 1.185 | 1.163 | 1.163 |
| AlⅥ | 0.019 | 0.035 | 0.012 | 0.007 | 0.000 | 0.005 | 0.000 | 0.000 | 0.028 | 0.000 |
| Ti | 0.240 | 0.234 | 0.248 | 0.223 | 0.230 | 0.243 | 0.238 | 0.238 | 0.230 | 0.245 |
| Fe3+ | 0.228 | 0.234 | 0.213 | 0.193 | 0.178 | 0.249 | 0.191 | 0.194 | 0.241 | 0.200 |
| Fe2+ | 1.236 | 1.159 | 1.228 | 1.335 | 1.355 | 1.231 | 1.347 | 1.330 | 1.260 | 1.290 |
| Mn | 0.018 | 0.020 | 0.022 | 0.022 | 0.025 | 0.022 | 0.024 | 0.022 | 0.024 | 0.024 |
| Mg | 1.097 | 1.172 | 1.117 | 1.103 | 1.068 | 1.073 | 1.082 | 1.073 | 1.052 | 1.091 |
| Ca | 0.002 | 0.000 | 0.000 | 0.000 | 0.000 | 0.000 | 0.000 | 0.000 | 0.009 | 0.000 |
| Na | 0.001 | 0.005 | 0.001 | 0.008 | 0.011 | 0.012 | 0.010 | 0.014 | 0.015 | 0.009 |
| K | 0.929 | 0.906 | 0.946 | 0.917 | 0.959 | 0.916 | 0.928 | 0.942 | 0.900 | 0.959 |
| Total | 7.772 | 7.766 | 7.787 | 7.807 | 7.822 | 7.751 | 7.809 | 7.806 | 7.759 | 7.800 |
| AlⅥ+Fe3++Ti | 0.488 | 0.503 | 0.473 | 0.422 | 0.408 | 0.497 | 0.429 | 0.432 | 0.499 | 0.445 |
| Fe2++Mn | 1.254 | 1.179 | 1.250 | 1.357 | 1.380 | 1.253 | 1.371 | 1.352 | 1.284 | 1.314 |
| Mg/(Mg+Fe2+) | 0.47 | 0.50 | 0.48 | 0.45 | 0.44 | 0.47 | 0.45 | 0.45 | 0.46 | 0.46 |

Table S2. (continued)

| Sample | 17XHD13 |  |  |  |  |  |  | ZK001-12 | ZK10001-09 |  |
| --- | --- | --- | --- | --- | --- | --- | --- | --- | --- | --- |
| Mineral | Bt | Bt | Bt | Bt | Bt | Bt | Bt | Bt | Mus | Mus |
| Spots | 17XHD13-C1-11 | 17XHD13-C3-03 | 17XHD13-C3-04 | 17XHD13-C3-07 | 17XHD13-C3-08 | 17XHD13-C3-09 | 17XHD13-C3-10 | ZK001-12-C2-01 | ZK10001-09-C2-01 | ZK10001-09-C2-02 |
| SiO2 | 36.29 | 36.64 | 36.38 | 36.43 | 36.19 | 36.53 | 36.61 | 36.48 | 46.39 | 46.04 |
| TiO2 | 3.93 | 3.83 | 4.22 | 3.90 | 3.72 | 3.41 | 3.79 | 3.50 | 0.24 | 0.25 |
| Al2O3 | 12.80 | 12.82 | 12.77 | 12.62 | 13.01 | 13.30 | 12.87 | 13.51 | 34.24 | 34.26 |
| FeO | 24.07 | 23.05 | 22.87 | 23.68 | 23.45 | 23.36 | 23.60 | 17.85 | 1.13 | 1.48 |
| MnO | 0.35 | 0.33 | 0.37 | 0.36 | 0.31 | 0.29 | 0.33 | 0.42 | 0.01 | 0.00 |
| MgO | 9.23 | 9.41 | 9.29 | 9.60 | 9.47 | 9.71 | 9.66 | 12.07 | 0.76 | 0.92 |
| CaO | 0.00 | 0.00 | 0.09 | 0.00 | 0.00 | 0.03 | 0.02 | 0.02 | 0.00 | 0.00 |
| Na2O | 0.07 | 0.10 | 0.14 | 0.10 | 0.08 | 0.06 | 0.09 | 0.02 | 0.07 | 0.05 |
| K2O | 9.18 | 9.43 | 9.28 | 9.77 | 9.47 | 9.14 | 9.41 | 9.60 | 10.64 | 10.69 |
| F | 0.20 | 0.42 | 0.18 | 0.38 | 0.19 | 0.31 | 0.31 | 0.63 | 0.00 | 0.00 |
| Cl | 0.04 | 0.05 | 0.06 | 0.04 | 0.02 | 0.03 | 0.03 | 0.01 | 0.00 | 0.00 |
| Total | 96.06 | 95.88 | 95.55 | 96.70 | 95.82 | 96.03 | 96.56 | 93.85 | 93.48 | 93.69 |
| Cations on the basis of 11 oxygens | | |  |  |  |  |  |  |  |  |
| Si | 2.820 | 2.836 | 2.829 | 2.814 | 2.815 | 2.822 | 2.822 | 2.814 | 3.138 | 3.117 |
| AlⅣ | 1.172 | 1.164 | 1.171 | 1.149 | 1.185 | 1.178 | 1.169 | 1.186 | 0.862 | 0.883 |
| AlⅥ | 0.000 | 0.005 | 0.000 | 0.000 | 0.008 | 0.033 | 0.000 | 0.043 | 1.868 | 1.850 |
| Ti | 0.230 | 0.223 | 0.247 | 0.226 | 0.218 | 0.198 | 0.220 | 0.203 | 0.012 | 0.013 |
| Fe3+ | 0.202 | 0.226 | 0.216 | 0.176 | 0.179 | 0.210 | 0.196 | 0.236 | 0.064 | 0.084 |
| Fe2+ | 1.362 | 1.266 | 1.271 | 1.354 | 1.347 | 1.299 | 1.325 | 0.916 | 0.000 | 0.000 |
| Mn | 0.023 | 0.022 | 0.024 | 0.023 | 0.021 | 0.019 | 0.022 | 0.027 | 0.001 | 0.000 |
| Mg | 1.069 | 1.086 | 1.077 | 1.105 | 1.098 | 1.118 | 1.110 | 1.388 | 0.076 | 0.093 |
| Ca | 0.000 | 0.000 | 0.008 | 0.000 | 0.000 | 0.002 | 0.001 | 0.002 | 0.000 | 0.000 |
| Na | 0.011 | 0.015 | 0.020 | 0.015 | 0.011 | 0.009 | 0.014 | 0.003 | 0.009 | 0.006 |
| K | 0.910 | 0.931 | 0.921 | 0.962 | 0.940 | 0.901 | 0.925 | 0.945 | 0.918 | 0.923 |
| Total | 7.798 | 7.774 | 7.784 | 7.824 | 7.821 | 7.790 | 7.804 | 7.764 | 6.948 | 6.969 |
| AlⅥ+Fe3++Ti | 0.431 | 0.454 | 0.463 | 0.402 | 0.405 | 0.442 | 0.416 | 0.483 | 1.944 | 1.947 |
| Fe2++Mn | 1.385 | 1.288 | 1.295 | 1.378 | 1.367 | 1.318 | 1.347 | 0.943 | 0.001 | 0.000 |
| Mg/(Mg+Fe2+) | 0.44 | 0.46 | 0.46 | 0.45 | 0.45 | 0.46 | 0.46 | 0.60 | 1.00 | 1.00 |

Table S2. (continued)

| Sample | 17XHD01 |  |  |  |  |  |  |  |  |  |
| --- | --- | --- | --- | --- | --- | --- | --- | --- | --- | --- |
| Mineral | Amp | Amp | Amp | Amp | Amp | Amp | Amp | Amp | Amp | Amp |
| Spots | 17XHD01-C1-03 | 17XHD01-C1-04 | 17XHD01-C1-05 | 17XHD01-C1-06 | 17XHD01-C1-07 | 17XHD01-C2-03 | 17XHD01-C2-04 | 17XHD01-C2-05 | 17XHD01-C2-06 | 17XHD01-C2-07 |
| SiO2 | 47.61 | 47.52 | 53.45 | 46.97 | 52.33 | 54.43 | 47.11 | 46.85 | 47.25 | 46.10 |
| TiO2 | 0.94 | 0.97 | 0.15 | 1.07 | 0.24 | 0.10 | 0.98 | 0.93 | 1.34 | 1.48 |
| Al2O3 | 6.04 | 6.29 | 1.76 | 6.62 | 2.16 | 1.53 | 6.25 | 6.40 | 6.39 | 7.43 |
| FeO | 19.25 | 19.20 | 16.80 | 18.98 | 17.33 | 12.70 | 18.96 | 19.05 | 19.06 | 19.31 |
| MnO | 0.58 | 0.53 | 0.64 | 0.49 | 0.68 | 0.52 | 0.51 | 0.53 | 0.57 | 0.51 |
| MgO | 10.65 | 10.52 | 12.80 | 10.29 | 12.43 | 15.83 | 10.79 | 10.47 | 10.51 | 9.91 |
| CaO | 10.54 | 11.25 | 11.90 | 11.20 | 11.22 | 11.10 | 11.38 | 11.00 | 11.06 | 11.23 |
| Na2O | 1.34 | 1.19 | 0.37 | 1.26 | 0.06 | 0.43 | 1.23 | 1.26 | 1.39 | 1.41 |
| K2O | 0.70 | 0.53 | 0.09 | 0.68 | 0.15 | 0.09 | 0.63 | 0.59 | 0.55 | 0.88 |
| F | 0.21 | 0.11 | 0.00 | 0.05 | 0.05 | 0.06 | 0.24 | 0.12 | 0.23 | 0.24 |
| Cl | 0.03 | 0.03 | 0.01 | 0.04 | 0.03 | 0.01 | 0.04 | 0.03 | 0.03 | 0.03 |
| Total | 97.79 | 98.07 | 97.96 | 97.62 | 96.63 | 96.78 | 97.99 | 97.16 | 98.28 | 98.43 |
| Cations on the basis of 23 oxygens | | |  |  |  |  |  |  |  |  |
| Si | 7.149 | 7.118 | 7.827 | 7.077 | 7.781 | 7.881 | 7.068 | 7.090 | 7.063 | 6.917 |
| AlⅣ | 0.851 | 0.882 | 0.173 | 0.923 | 0.219 | 0.119 | 0.932 | 0.911 | 0.937 | 1.083 |
| AlⅥ | 0.218 | 0.228 | 0.131 | 0.252 | 0.159 | 0.143 | 0.173 | 0.231 | 0.189 | 0.231 |
| Ti | 0.106 | 0.110 | 0.016 | 0.121 | 0.027 | 0.011 | 0.111 | 0.106 | 0.151 | 0.167 |
| Fe3+ | 0.583 | 0.588 | 0.935 | 0.555 | 0.989 | 0.970 | 0.555 | 0.556 | 0.582 | 0.513 |
| Fe2+ | 1.835 | 1.818 | 1.122 | 1.837 | 1.165 | 0.568 | 1.824 | 1.855 | 1.801 | 1.909 |
| Mn | 0.074 | 0.067 | 0.079 | 0.062 | 0.085 | 0.064 | 0.064 | 0.068 | 0.073 | 0.065 |
| Mg | 2.385 | 2.350 | 2.793 | 2.311 | 2.755 | 3.416 | 2.413 | 2.361 | 2.342 | 2.217 |
| Ca | 1.695 | 1.805 | 1.867 | 1.809 | 1.788 | 1.722 | 1.829 | 1.784 | 1.772 | 1.806 |
| Na | 0.389 | 0.346 | 0.106 | 0.368 | 0.016 | 0.120 | 0.357 | 0.370 | 0.403 | 0.409 |
| K | 0.134 | 0.101 | 0.016 | 0.130 | 0.028 | 0.017 | 0.120 | 0.113 | 0.104 | 0.169 |
| F | 0.210 | 0.105 | 0.000 | 0.053 | 0.048 | 0.063 | 0.239 | 0.117 | 0.233 | 0.241 |
| Cl | 0.030 | 0.026 | 0.005 | 0.044 | 0.027 | 0.013 | 0.042 | 0.025 | 0.027 | 0.031 |
| Total | 15.418 | 15.413 | 15.065 | 15.445 | 15.011 | 15.031 | 15.445 | 15.444 | 15.418 | 15.487 |
| NaA+KA | 0.418 | 0.412 | 0.065 | 0.445 | 0.044 | 0.031 | 0.445 | 0.444 | 0.418 | 0.487 |
| CaB | 1.695 | 1.805 | 1.867 | 1.809 | 1.788 | 1.722 | 1.829 | 1.784 | 1.772 | 1.806 |
| NaB | 0.105 | 0.035 | 0.057 | 0.053 | 0.016 | 0.107 | 0.032 | 0.039 | 0.090 | 0.091 |
| CaB+NaB | 1.800 | 1.840 | 1.924 | 1.862 | 1.804 | 1.829 | 1.860 | 1.823 | 1.862 | 1.897 |
| Mg/(Mg+Fe2+) | 0.57 | 0.56 | 0.71 | 0.56 | 0.70 | 0.86 | 0.57 | 0.56 | 0.57 | 0.54 |

Table S2. (continued)

| Sample | 17XHD02 |  |  | 17XHD03 |  | 17XHD04 |  | 17XHD06 |  |
| --- | --- | --- | --- | --- | --- | --- | --- | --- | --- |
| Mineral | Amp | Amp | Amp | Amp | Amp | Amp | Amp | Amp | Amp |
| Spots | 17XHD02-C1-01 | 17XHD02-C1-02 | 17XHD02-C1-03 | 17XHD03-C1-01 | 17XHD03-C1-02 | 17XHD04-C1-03 | 17XHD04-C1-04 | 17XHD06-C1-01 | 17XHD06-C2-01 |
| SiO2 | 53.51 | 47.16 | 47.22 | 46.14 | 48.40 | 47.20 | 47.79 | 48.84 | 47.40 |
| TiO2 | 0.19 | 1.00 | 1.38 | 1.04 | 0.78 | 1.03 | 0.92 | 0.85 |  |
| Al2O3 | 2.16 | 6.56 | 6.55 | 7.55 | 5.33 | 6.31 | 5.78 | 5.83 | 6.35 |
| FeO | 14.13 | 19.04 | 19.44 | 19.06 | 18.34 | 19.41 | 19.36 | 19.15 | 19.09 |
| MnO |  |  |  | 0.45 | 0.53 | 0.56 | 0.58 | 0.60 | 0.02 |
| MgO | 15.05 | 10.70 | 10.43 | 10.08 | 11.10 | 10.29 | 10.58 | 11.00 | 10.70 |
| CaO | 11.55 | 11.33 | 10.70 | 11.07 | 11.16 | 11.33 | 11.13 | 11.39 | 11.32 |
| Na2O | 0.51 | 1.27 | 1.40 | 1.15 | 1.01 | 1.25 | 1.22 | 1.06 | 1.10 |
| K2O | 0.18 | 0.59 | 0.56 | 0.98 | 0.45 | 0.67 | 0.54 | 0.42 | 0.60 |
| F | 0.04 | 0.16 | 0.13 | 0.02 | 0.07 | 0.35 | 0.28 | 0.14 | 0.10 |
| Cl | 0.01 | 0.04 | 0.04 |  |  | 0.04 | 0.02 | 0.03 |  |
| Total | 97.96 | 98.27 | 98.36 | 97.54 | 97.15 | 98.26 | 98.06 | 99.23 | 98.08 |
| Cations on the basis of 23 oxygens | | |  |  |  |  |  |  |  |
| Si | 7.769 | 7.076 | 7.084 | 6.974 | 7.274 | 7.073 | 7.159 | 7.205 | 7.188 |
| AlⅣ | 0.231 | 0.924 | 0.916 | 1.026 | 0.726 | 0.927 | 0.842 | 0.795 | 0.813 |
| AlⅥ | 0.138 | 0.235 | 0.242 | 0.319 | 0.217 | 0.187 | 0.178 | 0.218 | 0.322 |
| Ti | 0.021 | 0.112 | 0.156 | 0.118 | 0.088 | 0.116 | 0.104 | 0.094 | 0.000 |
| Fe3+ | 0.896 | 0.569 | 0.596 | 0.506 | 0.659 | 0.586 | 0.615 | 0.650 | 0.558 |
| Fe2+ | 0.820 | 1.819 | 1.842 | 1.903 | 1.646 | 1.846 | 1.811 | 1.712 | 1.863 |
| Mn | 0.000 | 0.000 | 0.000 | 0.057 | 0.067 | 0.070 | 0.073 | 0.075 | 0.003 |
| Mg | 3.257 | 2.393 | 2.331 | 2.272 | 2.486 | 2.299 | 2.362 | 2.419 | 2.418 |
| Ca | 1.796 | 1.821 | 1.720 | 1.793 | 1.797 | 1.819 | 1.786 | 1.800 | 1.840 |
| Na | 0.143 | 0.369 | 0.408 | 0.337 | 0.294 | 0.364 | 0.354 | 0.302 | 0.323 |
| K | 0.033 | 0.112 | 0.107 | 0.188 | 0.087 | 0.128 | 0.102 | 0.079 | 0.117 |
| F | 0.036 | 0.156 | 0.128 | 0.018 | 0.066 | 0.345 | 0.284 | 0.135 | 0.095 |
| Cl | 0.012 | 0.038 | 0.038 |  |  | 0.035 | 0.024 | 0.031 |  |
| Total | 15.104 | 15.431 | 15.404 | 15.494 | 15.341 | 15.414 | 15.385 | 15.350 | 15.442 |
| NaA+KA | 0.104 | 0.431 | 0.404 | 0.494 | 0.341 | 0.414 | 0.385 | 0.350 | 0.439 |
| CaB | 1.796 | 1.821 | 1.720 | 1.793 | 1.797 | 1.819 | 1.786 | 1.800 | 1.837 |
| NaB | 0.072 | 0.050 | 0.112 | 0.031 | 0.040 | 0.077 | 0.071 | 0.032 | 0.000 |
| CaB+NaB | 1.868 | 1.871 | 1.832 | 1.825 | 1.837 | 1.896 | 1.857 | 1.831 | 1.837 |
| Mg/(Mg+Fe2+) | 0.80 | 0.57 | 0.56 | 0.54 | 0.60 | 0.55 | 0.57 | 0.59 | 0.56 |

Table S2. (continued)

| Sample | | ZK001-12 | 17XHD08 | 17XHD08 | 17XHD13 |  |  |  |  |  |
| --- | --- | --- | --- | --- | --- | --- | --- | --- | --- | --- |
| Mineral | | Amp | Amp | Amp | Amp | Amp | Amp | Amp | Amp | Amp |
| Spots | | ZK001-12-C1-01 | 17XHD08-01-C1-01 | 17XHD08-01-C2-01 | 17XHD13-C1-01 | 17XHD13-C1-02 | 17XHD13-C2-01 | 17XHD13-C2-02 | 17XHD13-C3-01 | 17XHD13-C3-02 |
| SiO2 | | 42.81 | 49.28 | 48.41 | 46.90 | 47.43 | 45.71 | 45.18 | 44.86 | 45.52 |
| TiO2 | | 1.19 | 0.19 | 0.71 | 0.92 | 0.90 | 1.08 | 1.18 | 2.28 | 1.16 |
| Al2O3 | | 9.74 | 5.01 | 6.15 | 6.39 | 6.01 | 7.67 | 6.74 | 9.00 | 7.46 |
| FeO | | 17.79 | 18.65 | 18.73 | 19.99 | 19.79 | 19.26 | 19.41 | 17.01 | 18.87 |
| MnO | | 0.52 | 0.67 | 0.51 | 0.69 | 0.71 | 0.48 | 0.59 | 0.38 | 0.45 |
| MgO | | 10.35 | 11.46 | 11.22 | 10.08 | 10.21 | 10.33 | 9.78 | 10.67 | 10.26 |
| CaO | | 11.65 | 11.27 | 11.44 | 11.25 | 11.37 | 11.08 | 11.30 | 11.30 | 11.23 |
| Na2O | | 1.55 | 0.92 | 1.11 | 1.24 | 1.21 | 1.38 | 1.40 | 1.67 | 1.35 |
| K2O | | 1.36 | 0.44 | 0.49 | 0.60 | 0.53 | 0.84 | 1.00 | 0.75 | 0.74 |
| F | | 0.08 | 0.12 | 0.24 | 0.29 | 0.08 | 0.18 | 0.04 | 0.07 | 0.13 |
| Cl | | 0.08 | 0.03 | 0.03 | 0.03 | 0.03 | 0.04 | 0.05 | 0.01 | 0.04 |
| Total | | 97.06 | 97.96 | 98.93 | 98.26 | 98.24 | 97.97 | 96.63 | 97.96 | 97.14 |
| Cations on the basis of 23 oxygens | | | |  |  |  |  |  |  |  |
| Si | 6.546 | | 7.341 | 7.155 | 7.053 | 7.127 | 6.890 | 6.947 | 6.708 | 6.911 |
| AlⅣ | 1.454 | | 0.659 | 0.845 | 0.947 | 0.873 | 1.110 | 1.053 | 1.292 | 1.089 |
| AlⅥ | 0.302 | | 0.221 | 0.226 | 0.186 | 0.191 | 0.252 | 0.169 | 0.294 | 0.246 |
| Ti | 0.137 | | 0.021 | 0.079 | 0.104 | 0.102 | 0.123 | 0.136 | 0.256 | 0.132 |
| Fe3+ | 0.228 | | 0.660 | 0.622 | 0.559 | 0.557 | 0.459 | 0.405 | 0.461 | 0.477 |
| Fe2+ | 2.047 | | 1.663 | 1.693 | 1.955 | 1.931 | 1.969 | 2.092 | 1.666 | 1.919 |
| Mn | 0.068 | | 0.084 | 0.064 | 0.088 | 0.091 | 0.061 | 0.077 | 0.048 | 0.057 |
| Mg | 2.358 | | 2.544 | 2.471 | 2.259 | 2.287 | 2.322 | 2.243 | 2.377 | 2.323 |
| Ca | 1.909 | | 1.799 | 1.812 | 1.813 | 1.831 | 1.790 | 1.862 | 1.811 | 1.827 |
| Na | 0.458 | | 0.265 | 0.319 | 0.361 | 0.352 | 0.404 | 0.416 | 0.484 | 0.398 |
| K | 0.265 | | 0.083 | 0.092 | 0.116 | 0.102 | 0.161 | 0.196 | 0.143 | 0.143 |
| F | 0.077 | | 0.121 | 0.236 | 0.294 | 0.084 | 0.178 | 0.042 | 0.070 | 0.130 |
| Cl | 0.079 | | 0.026 | 0.027 | 0.030 | 0.027 | 0.043 | 0.045 | 0.011 | 0.038 |
| Total | 15.772 | | 15.340 | 15.378 | 15.441 | 15.443 | 15.541 | 15.595 | 15.539 | 15.524 |
| NaA+KA | 0.724 | | 0.340 | 0.378 | 0.441 | 0.443 | 0.541 | 0.595 | 0.539 | 0.524 |
| CaB | 1.861 | | 1.799 | 1.812 | 1.813 | 1.831 | 1.790 | 1.862 | 1.811 | 1.827 |
| NaB | 0.000 | | 0.008 | 0.033 | 0.036 | 0.011 | 0.024 | 0.017 | 0.088 | 0.018 |
| CaB+NaB | 1.861 | | 1.807 | 1.845 | 1.849 | 1.843 | 1.814 | 1.878 | 1.898 | 1.845 |
| Mg/(Mg+Fe2+) | 0.54 | | 0.60 | 0.59 | 0.54 | 0.54 | 0.54 | 0.52 | 0.59 | 0.55 |

Table S2. (continued)

| Sample | 17XHD01 |  |  | 17XHD02 |  | 17XHD03 |  | 17XHD04 |  | 17XHD06 |
| --- | --- | --- | --- | --- | --- | --- | --- | --- | --- | --- |
| Mineral | Kf | Kf | Pl | Kf | Pl | Kf | Kf | Kf | Kf | Kf |
| Spot | 17XHD01-C1-01 | 17XHD01-C2-08 | 17XHD01-C2-09 | 17XHD02-C1-07 | 17XHD02-C1-08 | 17XHD03-C1-04 | 17XHD03-C1-05 | 17XHD04-C1-05 | 17XHD04-C1-06 | 17XHD06-C1-03 |
| SiO2 | 65.08 | 66.01 | 63.28 | 66.12 | 65.27 | 65.51 | 65.65 | 66.68 | 65.68 | 65.83 |
| TiO2 | 0.01 | 0.00 | 0.00 | 0.01 | 0.01 | 0.01 | 0.01 | 0.01 | 0.01 | 0.00 |
| Al2O3 | 16.70 | 17.70 | 22.82 | 16.95 | 21.55 | 17.07 | 17.46 | 18.39 | 17.65 | 17.34 |
| FeO | 0.08 | 0.04 | 0.10 | 0.04 | 0.02 | 0.01 | 0.06 | 0.04 | 0.01 | 0.02 |
| MnO | 0.00 | 0.00 | 0.00 | 0.00 | 0.01 | 0.00 | 0.00 | 0.00 | 0.01 | 0.00 |
| MgO | 0.00 | 0.00 | 0.01 | 0.00 | 0.00 | 0.00 | 0.00 | 0.00 | 0.00 | 0.00 |
| CaO | 0.04 | 0.05 | 4.99 | 0.04 | 3.70 | 0.04 | 0.05 | 0.01 | 0.01 | 0.01 |
| Na2O | 0.30 | 0.42 | 8.47 | 0.73 | 9.33 | 0.24 | 0.39 | 0.97 | 0.32 | 0.26 |
| K2O | 17.14 | 17.31 | 0.29 | 16.80 | 0.27 | 17.11 | 17.04 | 16.03 | 17.18 | 17.70 |
| Total | 99.30 | 101.53 | 99.96 | 100.69 | 100.14 | 99.96 | 100.66 | 102.13 | 100.86 | 101.16 |
| Cations on the basis of 8 oxygens | | |  |  |  |  |  |  |  |  |
| Si | 3.046 | 3.021 | 2.803 | 3.046 | 2.872 | 3.040 | 3.028 | 3.013 | 3.023 | 3.029 |
| Al | 0.921 | 0.955 | 1.191 | 0.920 | 1.118 | 0.934 | 0.949 | 0.979 | 0.957 | 0.940 |
| Ca | 0.002 | 0.002 | 0.237 | 0.002 | 0.174 | 0.002 | 0.002 | 0.000 | 0.000 | 0.000 |
| Na | 0.027 | 0.037 | 0.727 | 0.065 | 0.796 | 0.022 | 0.035 | 0.085 | 0.028 | 0.023 |
| K | 1.023 | 1.011 | 0.017 | 0.987 | 0.015 | 1.013 | 1.003 | 0.924 | 1.009 | 1.039 |
| An | 0.20 | 0.21 | 24.13 | 0.20 | 17.70 | 0.17 | 0.21 | 0.04 | 0.04 | 0.03 |
| Ab | 2.54 | 3.54 | 74.18 | 6.15 | 80.76 | 2.09 | 3.35 | 8.40 | 2.73 | 2.17 |
| Or | 97.25 | 96.25 | 1.69 | 93.65 | 1.53 | 97.74 | 96.43 | 91.56 | 97.23 | 97.79 |

Table S2. (continued)

| Sample | 17XHD06 |  |  | 17XHD08 |  |  | 17XHD11 |  | 17XHD13 |  |
| --- | --- | --- | --- | --- | --- | --- | --- | --- | --- | --- |
| Mineral | Kf | Pl | Pl | Kf | Kf | Pl | Kf | Pl | Kf | Kf |
| Spot | 17XHD06-C2-03 | 17XHD06-C1-04 | 17XHD06-C2-04 | 17XHD08-01-C1-03 | 17XHD08-01-C2-02 | 17XHD08-01-C1-04 | 17XHD11-C1-02 | 17XHD11-C1-03 | 17XHD13-C1-12 | 17XHD13-C1-13 |
| SiO2 | 65.49 | 61.64 | 66.33 | 65.96 | 66.18 | 69.40 | 65.52 | 66.27 | 65.25 | 64.93 |
| TiO2 | 0.00 | 0.00 | 0.01 | 0.00 | 0.00 | 0.00 | 0.01 | 0.00 | 0.02 | 0.01 |
| Al2O3 | 17.00 | 23.85 | 20.50 | 17.19 | 17.55 | 18.40 | 17.12 | 21.13 | 17.81 | 17.99 |
| FeO | 0.03 | 0.12 | 0.02 | 0.01 | 0.05 | 0.03 | 0.01 | 0.07 | 0.02 | 0.02 |
| MnO | 0.00 | 0.01 | 0.00 | 0.02 | 0.00 | 0.00 | 0.01 | 0.02 | 0.00 | 0.01 |
| MgO | 0.00 | 0.00 | 0.00 | 0.00 | 0.00 | 0.00 | 0.00 | 0.00 | 0.00 | 0.00 |
| CaO | 0.03 | 3.01 | 2.53 | 0.03 | 0.01 | 0.28 | 0.01 | 2.78 | 0.01 | 0.02 |
| Na2O | 0.33 | 7.62 | 10.47 | 0.29 | 0.79 | 11.56 | 0.26 | 9.83 | 0.37 | 0.33 |
| K2O | 17.12 | 0.63 | 0.14 | 17.34 | 16.61 | 0.14 | 17.16 | 0.16 | 16.55 | 16.70 |
| Total | 100.01 | 100.11 | 99.99 | 100.82 | 101.18 | 99.81 | 100.09 | 100.25 | 100.04 | 100.07 |
| Cations on the basis of 8 oxygens | | |  |  |  |  |  |  |  |  |
| Si | 3.041 | 2.794 | 2.918 | 3.038 | 3.030 | 3.035 | 3.039 | 2.905 | 3.019 | 3.008 |
| Al | 0.930 | 1.275 | 1.063 | 0.933 | 0.947 | 0.948 | 0.936 | 1.092 | 0.971 | 0.983 |
| Ca | 0.001 | 0.146 | 0.119 | 0.001 | 0.000 | 0.013 | 0.000 | 0.130 | 0.000 | 0.001 |
| Na | 0.030 | 0.670 | 0.893 | 0.026 | 0.070 | 0.980 | 0.024 | 0.836 | 0.033 | 0.030 |
| K | 1.014 | 0.036 | 0.008 | 1.019 | 0.970 | 0.008 | 1.015 | 0.009 | 0.977 | 0.987 |
| An | 0.12 | 17.16 | 11.70 | 0.13 | 0.04 | 1.30 | 0.02 | 13.36 | 0.03 | 0.10 |
| Ab | 2.86 | 78.57 | 87.52 | 2.46 | 6.70 | 97.91 | 2.28 | 85.70 | 3.30 | 2.90 |
| Or | 97.02 | 4.27 | 0.78 | 97.41 | 93.26 | 0.79 | 97.70 | 0.93 | 96.66 | 97.00 |

Table S2. (continued)

| Sample | 17XHD13 |  |  |  | ZK001-12 |  |  |  | ZK10001-09 |  |
| --- | --- | --- | --- | --- | --- | --- | --- | --- | --- | --- |
| Mineral | Kf | Kf | Pl | Pl | Kf | Kf | Pl | Pl | Pl | Pl |
| Spot | 17XHD13-C2-04 | 17XHD13-C3-05 | 17XHD13-C2-05 | 17XHD13-C3-06 | ZK001-12-C1-03 | ZK001-12-C2-02 | ZK001-12-C1-04 | ZK001-12-C2-03 | ZK10001-09-C1-01 | ZK10001-09-C1-03 |
| SiO2 | 65.60 | 65.96 | 60.00 | 64.36 | 65.61 | 65.52 | 58.95 | 60.40 | 69.91 | 66.97 |
| TiO2 | 0.00 | 0.00 | 0.01 | 0.00 | 0.02 | 0.00 | 0.00 | 0.00 | 0.00 | 0.00 |
| Al2O3 | 17.91 | 18.01 | 25.40 | 22.08 | 17.03 | 17.03 | 24.86 | 24.47 | 19.07 | 19.65 |
| FeO | 0.05 | 0.05 | 0.18 | 0.12 | 0.09 | 0.11 | 0.19 | 0.17 | 0.02 | 0.00 |
| MnO | 0.01 | 0.00 | 0.01 | 0.00 | 0.01 | 0.00 | 0.01 | 0.01 | 0.00 | 0.00 |
| MgO | 0.00 | 0.00 | 0.01 | 0.00 | 0.01 | 0.00 | 0.01 | 0.00 | 0.00 | 0.00 |
| CaO | 0.03 | 0.02 | 7.48 | 3.96 | 0.03 | 0.04 | 8.02 | 7.58 | 0.27 | 0.65 |
| Na2O | 1.41 | 0.52 | 7.03 | 9.05 | 0.42 | 1.03 | 6.81 | 6.79 | 11.66 | 11.54 |
| K2O | 15.29 | 16.64 | 0.25 | 0.13 | 17.09 | 16.28 | 0.37 | 0.44 | 0.05 | 0.67 |
| Total | 100.29 | 101.20 | 100.37 | 99.71 | 100.27 | 99.96 | 99.22 | 99.84 | 100.97 | 99.48 |
| Cations on the basis of 8 oxygens | | |  |  |  |  |  |  |  |  |
| Si | 3.016 | 3.017 | 2.668 | 2.847 | 3.040 | 3.037 | 2.660 | 2.699 | 3.021 | 2.960 |
| Al | 0.970 | 0.971 | 1.331 | 1.151 | 0.930 | 0.930 | 1.322 | 1.288 | 0.971 | 1.024 |
| Ca | 0.001 | 0.001 | 0.357 | 0.187 | 0.002 | 0.002 | 0.388 | 0.363 | 0.013 | 0.031 |
| Na | 0.125 | 0.046 | 0.606 | 0.777 | 0.037 | 0.092 | 0.596 | 0.588 | 0.976 | 0.989 |
| K | 0.897 | 0.971 | 0.014 | 0.007 | 1.010 | 0.963 | 0.021 | 0.025 | 0.003 | 0.038 |
| An | 0.12 | 0.08 | 36.51 | 19.30 | 0.15 | 0.20 | 38.57 | 37.16 | 1.26 | 2.90 |
| Ab | 12.25 | 4.50 | 62.05 | 79.95 | 3.55 | 8.75 | 59.31 | 60.28 | 98.45 | 93.52 |
| Or | 87.63 | 95.42 | 1.44 | 0.75 | 96.30 | 91.05 | 2.12 | 2.55 | 0.29 | 3.58 |

Table S2. (continued)

| Sample | 17XHD11 |  |  | ZK10001-09 |
| --- | --- | --- | --- | --- |
| Mineral | Mt | Mt | Mt | Mt |
| Spot | 17XHD11-C1-05 | 17XHD11-C1-06 | 17XHD11-C1-07 | ZK10001-09-C1-04 |
| SiO2 | 0.14 | 0.12 | 0.10 | 0.10 |
| TiO2 | 0.26 | 0.26 | 0.27 | 0.25 |
| Al2O3 | 0.20 | 0.21 | 0.25 | 0.23 |
| FeO | **93.87** | **93.86** | **93.88** | **93.75** |
| MnO | 0.04 | 0.03 | 0.04 | 0.03 |
| MgO | 0.01 | 0.01 | 0.01 | 0.01 |
| CaO | 0.00 | 0.00 | 0.00 | 0.00 |
| Na2O | 0.00 | 0.00 | 0.00 | 0.00 |
| K2O | 0.00 | 0.00 | 0.00 | 0.00 |
| Cr2O3 | 0.01 | 0.01 | 0.00 | 0.00 |
| V2O3 | 0.06 | 0.06 | 0.07 | 0.00 |
| Total | 94.59 | 94.56 | 94.62 | 94.37 |

Note: Bt, biotite; Mus, muscovite; Amp, amphibole; Kf, K-feldspar ; Pl, plagioclase ; Mt, magnetite.

Table S3. LA-ICP-MS trace element data of zircons from the granitic rocks in the Xuehuading-Pangshanchong area, South China Block.

| Sample | 17XHD06 |  |  |  |  |  |  |  |  |  |
| --- | --- | --- | --- | --- | --- | --- | --- | --- | --- | --- |
| Sample spot | 01 | 02 | 03 | 04 | 05 | 06 | 07 | 08 | 09 | 10 |
| wt.% |  |  |  |  |  |  |  |  |  |  |
| SiO2 | 32.7 | 32.7 | 32.7 | 32.7 | 32.7 | 32.7 | 32.7 | 32.7 | 32.7 | 32.7 |
| ZrO2 | 41.8 | 42.8 | 41.8 | 40.5 | 43.0 | 43.5 | 44.1 | 42.0 | 41.0 | 42.2 |
| ppm |  |  |  |  |  |  |  |  |  |  |
| Ti | 4.4 | 5.0 | 2.3 | 2.7 | 3.5 | 5.7 | 8.2 | 3.1 | 3.4 | 2.4 |
| Y | 1458 | 1663 | 1093 | 1089 | 1158 | 628 | 1802 | 1026 | 1280 | 970 |
| Nb | 7.67 | 10.77 | 5.79 | 6.31 | 6.62 | 2.98 | 3.75 | 5.83 | 5.80 | 5.23 |
| La | 1.92 | 1.92 | 9.30 | 2.17 | 0.03 | 0.04 | 0.11 | 4.04 | 2.69 | 1.73 |
| Ce | 29.6 | 28.4 | 40.3 | 15.7 | 12.8 | 9.3 | 24.0 | 18.0 | 25.2 | 15.2 |
| Pr | 0.63 | 0.63 | 4.37 | 0.41 | 0.04 | 0.06 | 0.24 | 1.13 | 1.19 | 0.45 |
| Nd | 4.96 | 4.64 | 23.92 | 3.03 | 0.90 | 0.76 | 4.18 | 6.64 | 7.54 | 3.08 |
| Sm | 5.57 | 5.83 | 9.47 | 2.84 | 2.68 | 1.97 | 9.71 | 3.71 | 5.31 | 2.86 |
| Eu | 1.47 | 0.65 | 0.82 | 0.46 | 0.30 | 0.27 | 1.17 | 0.72 | 0.71 | 0.33 |
| Gd | 30.3 | 34.1 | 25.4 | 18.8 | 19.5 | 13.6 | 50.3 | 18.9 | 25.7 | 16.2 |
| Tb | 11.47 | 13.17 | 8.98 | 7.93 | 8.04 | 5.15 | 17.05 | 7.61 | 10.32 | 6.73 |
| Dy | 147 | 171 | 111 | 107 | 110 | 65 | 200 | 99 | 130 | 92 |
| Ho | 63.0 | 71.9 | 46.9 | 47.2 | 49.0 | 27.5 | 80.3 | 43.4 | 55.2 | 41.4 |
| Er | 285 | 319 | 215 | 217 | 233 | 124 | 336 | 206 | 251 | 199 |
| Tm | 67 | 75 | 53 | 54 | 57 | 30 | 75 | 51 | 60 | 50 |
| Yb | 557 | 613 | 439 | 457 | 484 | 252 | 571 | 429 | 486 | 428 |
| Lu | 128.1 | 137.5 | 99.9 | 104.3 | 112.2 | 58.2 | 122.6 | 98.5 | 109.0 | 100.4 |
| Hf | 7601 | 8004 | 8647 | 8525 | 8422 | 8460 | 7431 | 8853 | 8203 | 8525 |
| Ta | 5.8 | 7.0 | 6.5 | 7.0 | 6.5 | 2.9 | 2.6 | 6.4 | 5.5 | 5.6 |
| Pb | 113.98 | 156.20 | 182.69 | 173.81 | 110.28 | 70.56 | 88.95 | 160.38 | 151.84 | 100.93 |
| Th | 515 | 738 | 604 | 534 | 376 | 169 | 621 | 454 | 644 | 336 |
| U | 1228 | 1711 | 2077 | 1987 | 1294 | 570 | 912 | 1852 | 1680 | 1167 |
| Age | 432 | 432 | 432 | 432 | 432 | 648 | 432 | 433 | 433 | 431 |
| (Sm/La)N | 5.07 | 5.30 | 1.78 | 2.29 | 163.39 | 90.26 | 157.72 | 1.60 | 3.44 | 2.88 |
| Ce/Ce* | 6.01 | 5.77 | 1.41 | 3.70 | 80.01 | 45.11 | 33.15 | 1.88 | 3.13 | 3.85 |
| Zircon Ce4+/Ce3+ | 123 | 114 | 48 | 199 | 196 | 137 | 31 | 131 | 98 | 187 |
| Eu/Eu* | 0.35 | 0.14 | 0.16 | 0.19 | 0.13 | 0.16 | 0.16 | 0.27 | 0.19 | 0.15 |
| T-Zr-Ti(°C) | 733 | 745 | 677 | 692 | 714 | 757 | 795 | 704 | 710 | 683 |
| log(fO2) | -17.24 | -17.37 | -18.38 | -19.57 | -19.08 | -17.98 | -16.25 | -18.99 | -18.29 | -19.44 |
| 1σ | 1.38 | 1.33 | 1.92 | 1.76 | 1.52 | 1.28 | 1.17 | 1.64 | 1.54 | 1.82 |
| △NNO | -2.74 | -3.17 | -2.49 | -4.03 | -4.12 | -4.09 | -3.29 | -3.75 | -3.21 | -3.68 |

Table S3. (continued)

| Sample | 17XHD06 |  |  |  |  |  |  |  |  |  |
| --- | --- | --- | --- | --- | --- | --- | --- | --- | --- | --- |
| Sample spot | 11 | 12 | 13 | 14 | 15 | 16 | 17 | 18 | 19 | 20 |
| wt.% |  |  |  |  |  |  |  |  |  |  |
| SiO2 | 32.7 | 32.7 | 32.7 | 32.7 | 32.7 | 32.7 | 32.7 | 32.7 | 32.7 | 32.7 |
| ZrO2 | 42.4 | 39.4 | 46.8 | 42.2 | 40.9 | 34.2 | 41.1 | 41.6 | 41.7 | 40.5 |
| ppm |  |  |  |  |  |  |  |  |  |  |
| Ti | 4.1 | 9.1 | 7.3 | 3.2 | 1.8 | 25.3 | 4.2 | 3.9 | 3.9 | 2.9 |
| Y | 1175 | 1829 | 1065 | 1397 | 1141 | 1422 | 1482 | 1316 | 1583 | 1101 |
| Nb | 5.86 | 9.42 | 4.67 | 7.74 | 6.22 | 7.27 | 8.33 | 7.09 | 8.17 | 5.73 |
| La | 0.91 | 19.02 | 0.05 | 1.45 | 2.67 | 26.18 | 2.96 | 0.25 | 0.70 | 23.71 |
| Ce | 16.2 | 69.7 | 15.3 | 20.7 | 19.8 | 104.6 | 27.2 | 20.1 | 28.7 | 78.6 |
| Pr | 0.16 | 4.53 | 0.14 | 0.56 | 0.60 | 8.86 | 1.17 | 0.21 | 0.32 | 9.69 |
| Nd | 1.42 | 22.02 | 1.41 | 3.38 | 3.90 | 60.64 | 6.66 | 1.94 | 2.97 | 50.74 |
| Sm | 2.87 | 9.76 | 4.13 | 3.85 | 3.74 | 19.62 | 5.30 | 4.13 | 5.49 | 15.42 |
| Eu | 0.35 | 3.62 | 0.38 | 0.43 | 0.62 | 4.28 | 0.60 | 0.50 | 0.82 | 0.97 |
| Gd | 22.0 | 42.8 | 22.8 | 24.0 | 20.4 | 36.3 | 28.0 | 25.8 | 32.4 | 31.5 |
| Tb | 8.90 | 13.60 | 8.51 | 9.85 | 8.29 | 10.55 | 11.15 | 10.57 | 12.73 | 9.92 |
| Dy | 116 | 180 | 104 | 134 | 112 | 139 | 146 | 136 | 162 | 116 |
| Ho | 51.0 | 79.1 | 43.4 | 59.2 | 49.5 | 58.1 | 64.0 | 57.4 | 68.8 | 47.9 |
| Er | 235 | 347 | 199 | 278 | 228 | 262 | 295 | 254 | 308 | 213 |
| Tm | 56 | 81 | 51 | 68 | 56 | 68 | 72 | 61 | 73 | 52 |
| Yb | 466 | 668 | 424 | 575 | 469 | 488 | 607 | 496 | 598 | 432 |
| Lu | 107.8 | 154.1 | 96.3 | 133.2 | 106.2 | 120.6 | 138.4 | 110.1 | 135.0 | 99.3 |
| Hf | 8296 | 7671 | 8596 | 8404 | 8425 | 7165 | 7951 | 7960 | 7841 | 8299 |
| Ta | 5.5 | 6.4 | 4.2 | 7.8 | 6.6 | 3.8 | 7.6 | 6.3 | 6.5 | 6.0 |
| Pb | 97.61 | 235.58 | 111.91 | 150.40 | 161.71 | 170.77 | 175.50 | 160.94 | 148.54 | 170.72 |
| Th | 410 | 1009 | 394 | 516 | 509 | 598 | 649 | 687 | 741 | 627 |
| U | 1095 | 2566 | 1257 | 1715 | 1837 | 1782 | 2009 | 1799 | 1593 | 1920 |
| Age | 430 | 430 | 432 | 432 | 432 | 436 | 432 | 432 | 433 | 432 |
| (Sm/La)N | 5.47 | 0.89 | 150.20 | 4.63 | 2.44 | 1.31 | 3.12 | 28.36 | 13.60 | 1.13 |
| Ce/Ce* | 9.60 | 1.67 | 41.78 | 5.13 | 3.48 | 1.53 | 3.26 | 19.29 | 13.43 | 1.16 |
| Zircon Ce4+/Ce3+ | 207 | 117 | 87 | 184 | 150 | 36 | 135 | 127 | 128 | 36 |
| Eu/Eu* | 0.14 | 0.55 | 0.12 | 0.14 | 0.22 | 0.49 | 0.15 | 0.15 | 0.19 | 0.14 |
| T-Zr-Ti(°C) | 727 | 805 | 783 | 704 | 656 | 925 | 730 | 723 | 722 | 698 |
| log(fO2) | -18.30 | -14.81 | -17.35 | -18.73 | -20.02 | -11.49 | -17.79 | -18.44 | -17.81 | -16.63 |
| 1σ | 1.42 | 1.19 | 1.21 | 1.61 | 2.27 | 1.05 | 1.43 | 1.45 | 1.45 | 1.66 |
| △NNO | -3.65 | -2.11 | -4.09 | -3.51 | -3.60 | -1.78 | -3.21 | -3.69 | -3.03 | -1.26 |

Table S3. (continued)

| Sample | 17XHD08 |  |  |  |  |  |  |  |  |  |
| --- | --- | --- | --- | --- | --- | --- | --- | --- | --- | --- |
| Sample spot | 1 | 2 | 3 | 4 | 5 | 6 | 7 | 8 | 9 | 10 |
| wt.% |  |  |  |  |  |  |  |  |  |  |
| SiO2 | 32.7 | 32.7 | 32.7 | 32.7 | 32.7 | 32.7 | 32.7 | 32.7 | 32.7 | 32.7 |
| ZrO2 | 44.9 | 43.0 | 42.6 | 42.5 | 44.1 | 45.5 | 46.4 | 40.2 | 46.1 | 44.3 |
| ppm |  |  |  |  |  |  |  |  |  |  |
| Ti | 2.3 | 7.1 | 3.2 | 32.7 | 4.0 | 4.5 | 2.0 | 2.2 | 4.9 | 7.1 |
| Y | 1320 | 1563 | 1499 | 1279 | 1304 | 818 | 955 | 1524 | 847 | 1178 |
| Nb | 8.39 | 14.52 | 12.67 | 18.72 | 9.46 | 3.99 | 6.28 | 9.22 | 5.88 | 6.82 |
| La | 1.01 | 1.65 | 0.50 | 7.88 | 0.85 | 0.07 | 0.06 | 2.00 | 9.16 | 4.69 |
| Ce | 20.3 | 26.9 | 21.4 | 88.4 | 26.3 | 16.1 | 10.4 | 35.6 | 32.7 | 30.1 |
| Pr | 0.55 | 1.15 | 0.42 | 8.16 | 0.80 | 0.06 | 0.06 | 1.04 | 3.39 | 2.23 |
| Nd | 2.82 | 7.62 | 3.22 | 38.88 | 5.29 | 1.21 | 0.56 | 6.41 | 16.23 | 11.41 |
| Sm | 3.78 | 6.38 | 4.72 | 20.78 | 5.78 | 3.10 | 1.86 | 9.17 | 5.28 | 6.59 |
| Eu | 0.49 | 0.75 | 0.54 | 2.38 | 0.57 | 0.30 | 0.24 | 1.04 | 0.51 | 0.92 |
| Gd | 22.6 | 31.2 | 28.4 | 47.6 | 27.5 | 19.0 | 14.4 | 33.5 | 17.2 | 25.5 |
| Tb | 9.63 | 12.38 | 11.65 | 15.83 | 10.58 | 7.32 | 6.43 | 13.45 | 6.60 | 9.93 |
| Dy | 130 | 160 | 154 | 160 | 134 | 90 | 92 | 158 | 84 | 126 |
| Ho | 58.4 | 70.0 | 68.1 | 61.1 | 58.8 | 37.7 | 42.3 | 70.7 | 37.4 | 53.3 |
| Er | 277 | 323 | 309 | 245 | 266 | 166 | 202 | 314 | 176 | 239 |
| Tm | 72 | 81 | 77 | 53 | 66 | 40 | 53 | 80 | 46 | 59 |
| Yb | 597 | 659 | 622 | 430 | 535 | 327 | 453 | 633 | 384 | 476 |
| Lu | 141.7 | 157.6 | 146.0 | 88.3 | 124.9 | 77.6 | 109.9 | 155.6 | 91.6 | 111.7 |
| Hf | 9070 | 8158 | 8558 | 8673 | 8886 | 8579 | 8926 | 8422 | 9089 | 8671 |
| Ta | 8.3 | 8.2 | 7.8 | 5.1 | 7.1 | 3.4 | 6.2 | 9.1 | 6.2 | 6.4 |
| Pb | 195.89 | 171.13 | 207.16 | 111.12 | 175.55 | 81.99 | 117.10 | 269.34 | 109.21 | 132.24 |
| Th | 629 | 653 | 782 | 790 | 663 | 265 | 325 | 1058 | 306 | 509 |
| U | 2152 | 1859 | 2237 | 1119 | 1890 | 755 | 1325 | 2759 | 1199 | 1422 |
| Age | 432 | 432 | 432 | 427 | 432 | 514 | 433 | 430 | 432 | 432 |
| (Sm/La)N | 6.55 | 6.76 | 16.44 | 4.60 | 11.91 | 76.04 | 56.20 | 8.01 | 1.01 | 2.45 |
| Ce/Ce* | 6.09 | 4.36 | 10.46 | 2.46 | 7.13 | 53.62 | 38.53 | 5.51 | 1.31 | 2.07 |
| Zircon Ce4+/Ce3+ | 117 | 61 | 81 | 11 | 58 | 75 | 187 | 40 | 67 | 46 |
| Eu/Eu* | 0.16 | 0.16 | 0.14 | 0.23 | 0.14 | 0.12 | 0.14 | 0.18 | 0.16 | 0.22 |
| T-Zr-Ti(°C) | 676 | 780 | 705 | 959 | 724 | 737 | 666 | 676 | 745 | 780 |
| log(fO2) | -19.47 | -16.50 | -18.71 | -11.06 | -17.79 | -17.59 | -20.43 | -18.71 | -16.49 | -16.10 |
| 1σ | 1.90 | 1.21 | 1.57 | 0.98 | 1.43 | 1.36 | 2.05 | 1.90 | 1.33 | 1.20 |
| △NNO | -3.54 | -3.18 | -3.51 | -2.20 | -3.07 | -3.18 | -4.26 | -2.77 | -2.27 | -2.78 |

Table S3. (continued)

| Sample | 17XHD08 |  |  |  |  |  |  |  |  |  |
| --- | --- | --- | --- | --- | --- | --- | --- | --- | --- | --- |
| Sample spot | 11 | 12 | 13 | 14 | 15 | 16 | 17 | 18 | 19 | 20 |
| wt.% |  |  |  |  |  |  |  |  |  |  |
| SiO2 | 32.7 | 32.7 | 32.7 | 32.7 | 32.7 | 32.7 | 32.7 | 32.7 | 32.7 | 32.7 |
| ZrO2 | 44.0 | 41.1 | 46.5 | 42.9 | 41.0 | 44.9 | 44.6 | 46.6 | 42.8 | 45.2 |
| ppm |  |  |  |  |  |  |  |  |  |  |
| Ti | 7.7 | 5.5 | 17.8 | 5.9 | 17.0 | 6.7 | 3.7 | 9.7 | 3.3 | 2.6 |
| Y | 1185 | 1323 | 2211 | 1157 | 1758 | 1279 | 858 | 947 | 1189 | 908 |
| Nb | 7.01 | 7.32 | 2.33 | 8.73 | 18.65 | 8.34 | 5.66 | 4.25 | 7.89 | 4.50 |
| La | 0.24 | 7.31 | 0.05 | 0.20 | 4.21 | 0.78 | 0.60 | 0.01 | 3.45 | 9.54 |
| Ce | 15.8 | 46.5 | 20.1 | 15.6 | 50.7 | 22.0 | 9.4 | 23.6 | 27.0 | 36.9 |
| Pr | 0.23 | 2.53 | 0.39 | 0.15 | 2.79 | 0.78 | 0.19 | 0.10 | 1.11 | 4.30 |
| Nd | 2.13 | 15.48 | 6.56 | 1.64 | 18.70 | 4.44 | 0.95 | 1.58 | 7.80 | 23.06 |
| Sm | 3.73 | 7.64 | 14.98 | 3.47 | 14.04 | 5.20 | 1.74 | 4.31 | 6.78 | 7.72 |
| Eu | 0.39 | 1.36 | 1.11 | 0.31 | 3.43 | 0.55 | 0.21 | 0.51 | 1.59 | 0.55 |
| Gd | 22.2 | 35.8 | 75.0 | 21.9 | 48.0 | 25.2 | 13.8 | 24.9 | 28.2 | 19.5 |
| Tb | 9.21 | 12.44 | 26.23 | 9.54 | 16.60 | 10.10 | 6.15 | 9.00 | 9.52 | 7.03 |
| Dy | 122 | 150 | 286 | 123 | 193 | 132 | 84 | 111 | 132 | 91 |
| Ho | 52.8 | 60.8 | 104.5 | 53.2 | 79.1 | 57.8 | 38.2 | 45.4 | 56.2 | 41.0 |
| Er | 243 | 265 | 410 | 241 | 341 | 267 | 184 | 194 | 244 | 194 |
| Tm | 61 | 63 | 91 | 60 | 82 | 67 | 47 | 46 | 61 | 49 |
| Yb | 495 | 479 | 671 | 485 | 639 | 543 | 395 | 357 | 473 | 408 |
| Lu | 115.7 | 117.2 | 145.4 | 112.6 | 147.9 | 129.8 | 97.2 | 84.5 | 111.2 | 98.9 |
| Hf | 8879 | 7714 | 8451 | 8848 | 7759 | 9028 | 9367 | 7361 | 8373 | 9388 |
| Ta | 6.9 | 5.1 | 1.9 | 7.0 | 7.4 | 6.8 | 6.2 | 2.4 | 6.7 | 4.9 |
| Pb | 156.32 | 167.43 | 41.82 | 182.20 | 203.05 | 135.52 | 118.16 | 177.00 | 187.32 | 105.26 |
| Th | 524 | 919 | 255 | 611 | 914 | 465 | 338 | 243 | 657 | 302 |
| U | 1736 | 1568 | 424 | 1986 | 2237 | 1478 | 1306 | 425 | 2001 | 1198 |
| Age | 433 | 433 | 432 | 430 | 408 | 431 | 431 | 1600 | 430 | 432 |
| (Sm/La)N | 27.67 | 1.82 | 475.91 | 30.38 | 5.81 | 11.59 | 5.08 | 592.52 | 3.43 | 1.41 |
| Ce/Ce* | 15.20 | 2.41 | 30.59 | 20.04 | 3.30 | 6.28 | 6.24 | 144.44 | 3.06 | 1.28 |
| Zircon Ce4+/Ce3+ | 76 | 56 | 7 | 83 | 23 | 62 | 171 | 62 | 39 | 39 |
| Eu/Eu* | 0.13 | 0.25 | 0.10 | 0.11 | 0.41 | 0.15 | 0.14 | 0.15 | 0.35 | 0.14 |
| T-Zr-Ti(°C) | 789 | 755 | 881 | 761 | 875 | 775 | 719 | 812 | 709 | 688 |
| log(fO2) | -17.17 | -16.05 | -14.19 | -17.86 | -13.78 | -16.77 | -19.30 | -15.03 | -18.10 | -17.59 |
| 1σ | 1.19 | 1.28 | 1.10 | 1.27 | 1.05 | 1.22 | 1.48 | 1.17 | 1.54 | 1.75 |
| △NNO | -4.05 | -2.10 | -3.38 | -4.06 | -2.82 | -3.31 | -4.44 | -2.50 | -3.00 | -1.95 |

Table S3. (continued)

| Sample | 17XHD12 |  |  |  |  |  |  |  |  |  |
| --- | --- | --- | --- | --- | --- | --- | --- | --- | --- | --- |
| Sample spot | 1 | 2 | 3 | 4 | 5 | 6 | 7 | 8 | 9 | 10 |
| wt.% |  |  |  |  |  |  |  |  |  |  |
| SiO2 | 32.7 | 32.7 | 32.7 | 32.7 | 32.7 | 32.7 | 32.7 | 32.7 | 32.7 | 32.7 |
| ZrO2 | 42.4 | 44.9 | 45.2 | 45.7 | 39.8 | 44.1 | 45.3 | 46.4 | 45.4 | 47.4 |
| ppm |  |  |  |  |  |  |  |  |  |  |
| Ti | 148.5 | 3.4 | 2.8 | 1.8 | 10.1 | 7.9 | 49.3 | 59.8 | 9.4 | 2.7 |
| Y | 1048 | 1699 | 1094 | 856 | 2879 | 1524 | 1054 | 1286 | 1680 | 1287 |
| Nb | 9.22 | 6.38 | 6.08 | 5.19 | 28.73 | 9.74 | 6.69 | 18.55 | 9.00 | 5.21 |
| La | 0.52 | 0.63 | 2.48 | 0.02 | 1.56 | 0.13 | 0.11 | 0.93 | 1.40 | 0.13 |
| Ce | 23.7 | 23.1 | 24.5 | 11.4 | 48.7 | 24.1 | 18.0 | 21.0 | 34.8 | 17.5 |
| Pr | 0.49 | 0.41 | 0.72 | 0.04 | 1.39 | 0.19 | 0.19 | 0.54 | 0.41 | 0.14 |
| Nd | 3.36 | 4.02 | 3.72 | 0.56 | 12.50 | 2.39 | 1.93 | 2.79 | 4.40 | 1.48 |
| Sm | 3.52 | 6.90 | 3.44 | 1.94 | 16.33 | 5.44 | 3.66 | 3.72 | 7.42 | 3.77 |
| Eu | 0.72 | 0.66 | 0.48 | 0.27 | 1.68 | 0.62 | 0.49 | 0.56 | 1.05 | 0.56 |
| Gd | 19.7 | 36.3 | 20.5 | 14.8 | 78.2 | 33.0 | 21.9 | 20.6 | 42.2 | 24.8 |
| Tb | 7.53 | 14.23 | 8.18 | 6.29 | 27.90 | 12.86 | 8.79 | 8.71 | 15.42 | 10.02 |
| Dy | 101 | 178 | 108 | 85 | 330 | 164 | 113 | 118 | 185 | 129 |
| Ho | 45.2 | 75.0 | 48.1 | 37.9 | 130.9 | 69.1 | 47.7 | 53.6 | 76.3 | 56.4 |
| Er | 216 | 337 | 223 | 179 | 552 | 307 | 210 | 260 | 329 | 262 |
| Tm | 55 | 85 | 58 | 46 | 130 | 74 | 51 | 70 | 77 | 67 |
| Yb | 465 | 681 | 479 | 391 | 992 | 582 | 408 | 611 | 598 | 552 |
| Lu | 118.4 | 157.6 | 115.8 | 93.9 | 224.8 | 134.1 | 93.9 | 155.6 | 140.3 | 130.2 |
| Hf | 8544 | 8749 | 8686 | 9689 | 7260 | 8155 | 8543 | 9218 | 8312 | 8868 |
| Ta | 6.0 | 5.4 | 5.8 | 5.9 | 9.7 | 7.1 | 5.1 | 8.9 | 5.6 | 4.7 |
| Pb | 161.51 | 191.15 | 153.15 | 157.40 | 321.74 | 193.57 | 125.52 | 176.24 | 160.58 | 162.08 |
| Th | 690 | 923 | 665 | 510 | 1967 | 903 | 514 | 634 | 948 | 738 |
| U | 1709 | 2001 | 1622 | 1736 | 3108 | 2028 | 1341 | 2132 | 1511 | 1718 |
| Age | 432 | 432 | 432 | 432 | 432 | 432 | 433 | 383 | 423 | 432 |
| (Sm/La)N | 11.68 | 19.22 | 2.42 | 143.08 | 18.23 | 73.96 | 59.99 | 6.98 | 9.25 | 51.10 |
| Ce/Ce* | 10.35 | 10.20 | 4.09 | 87.51 | 7.36 | 34.46 | 28.06 | 6.60 | 10.26 | 29.39 |
| Zircon Ce4+/Ce3+ | 77 | 25 | 81 | 93 | 13 | 36 | 41 | 80 | 29 | 53 |
| Eu/Eu* | 0.27 | 0.13 | 0.18 | 0.16 | 0.14 | 0.14 | 0.17 | 0.20 | 0.18 | 0.18 |
| T-Zr-Ti(°C) | 1209 | 710 | 694 | 660 | 816 | 791 | 1018 | 1048 | 809 | 690 |
| log(fO2) | -10.81 | -18.92 | -18.97 | -21.14 | -15.78 | -17.06 | -13.41 | -13.07 | -15.96 | -19.77 |
| 1σ | 1.15 | 1.74 | 1.89 | 2.27 | 1.34 | 1.42 | 1.34 | 1.05 | 1.74 | 1.95 |
| △NNO | -8.21 | -3.84 | -3.49 | -4.80 | -3.35 | -4.01 | -6.03 | -6.44 | -3.34 | -4.18 |

Table S3. (continued)

| Sample | 17XHD12 |  |  |  |  |  |  |  |  |
| --- | --- | --- | --- | --- | --- | --- | --- | --- | --- |
| Sample spot | 11 | 12 | 13 | 14 | 15 | 16 | 17 | 18 | 19 |
| wt.% |  |  |  |  |  |  |  |  |  |
| SiO2 | 32.7 | 32.7 | 32.7 | 32.7 | 32.7 | 32.7 | 32.7 | 32.7 | 32.7 |
| ZrO2 | 42.6 | 44.2 | 43.9 | 45.4 | 43.5 | 44.3 | 44.9 | 45.6 | 46.1 |
| ppm |  |  |  |  |  |  |  |  |  |
| Ti | 5.5 | 2.2 | 5.2 | 4.6 | 5.4 | 19.8 | 4.3 | 3.0 | 16.0 |
| Y | 1117 | 946 | 1247 | 1324 | 1244 | 3385 | 1061 | 1015 | 2750 |
| Nb | 7.20 | 6.71 | 14.11 | 34.36 | 14.90 | 6.96 | 11.15 | 5.90 | 5.94 |
| La | 0.39 | 0.23 | 0.43 | 0.07 | 0.54 | 0.30 | 3.62 | 0.09 | 2.58 |
| Ce | 17.3 | 15.2 | 34.7 | 17.3 | 31.0 | 51.3 | 26.9 | 16.5 | 53.0 |
| Pr | 0.14 | 0.18 | 0.52 | 0.19 | 0.34 | 1.10 | 1.60 | 0.07 | 1.67 |
| Nd | 1.31 | 1.59 | 4.16 | 1.98 | 3.81 | 16.40 | 8.93 | 1.05 | 17.93 |
| Sm | 2.81 | 2.91 | 5.41 | 4.69 | 4.87 | 27.61 | 5.11 | 2.69 | 24.78 |
| Eu | 0.48 | 0.36 | 1.12 | 0.45 | 0.84 | 5.47 | 0.67 | 0.40 | 4.60 |
| Gd | 20.3 | 17.2 | 27.5 | 27.8 | 27.2 | 128.9 | 21.3 | 19.6 | 104.1 |
| Tb | 8.19 | 7.21 | 10.31 | 11.10 | 10.43 | 40.64 | 8.33 | 7.92 | 32.62 |
| Dy | 111 | 93 | 127 | 141 | 127 | 439 | 108 | 103 | 352 |
| Ho | 49.1 | 41.5 | 54.1 | 60.7 | 54.0 | 161.5 | 48.0 | 44.9 | 132.4 |
| Er | 229 | 194 | 244 | 266 | 240 | 632 | 218 | 206 | 515 |
| Tm | 59 | 50 | 62 | 65 | 62 | 137 | 55 | 53 | 112 |
| Yb | 483 | 420 | 522 | 514 | 504 | 993 | 455 | 435 | 833 |
| Lu | 122.0 | 101.8 | 127.1 | 118.1 | 118.1 | 216.9 | 108.7 | 104.9 | 188.3 |
| Hf | 8646 | 8948 | 7896 | 8693 | 8182 | 6569 | 8945 | 8448 | 7443 |
| Ta | 6.4 | 5.9 | 6.5 | 6.3 | 7.2 | 3.2 | 7.2 | 5.5 | 5.8 |
| Pb | 191.91 | 182.77 | 205.66 | 133.41 | 218.55 | 127.69 | 192.41 | 163.50 | 108.66 |
| Th | 688 | 678 | 1401 | 572 | 1236 | 1501 | 762 | 683 | 1200 |
| U | 2032 | 1982 | 2041 | 1412 | 2166 | 1028 | 2057 | 1695 | 917 |
| Age | 428 | 433 | 432 | 432 | 432 | 433 | 432 | 432 | 432 |
| (Sm/La)N | 12.52 | 21.76 | 21.83 | 115.94 | 15.75 | 158.63 | 2.46 | 54.62 | 16.78 |
| Ce/Ce* | 16.30 | 16.41 | 16.28 | 33.72 | 16.17 | 19.80 | 2.49 | 47.70 | 5.70 |
| Zircon Ce4+/Ce3+ | 88 | 61 | 51 | 30 | 52 | 4 | 38 | 79 | 5 |
| Eu/Eu* | 0.19 | 0.16 | 0.28 | 0.12 | 0.22 | 0.28 | 0.20 | 0.17 | 0.28 |
| T-Zr-Ti(°C) | 755 | 674 | 750 | 738 | 754 | 894 | 733 | 700 | 868 |
| log(fO2) | -18.25 | -20.40 | -17.41 | -18.44 | -17.51 | -14.05 | -18.07 | -19.56 | -14.17 |
| 1σ | 1.41 | 2.03 | 1.73 | 1.67 | 1.59 | 2.94 | 1.53 | 1.83 | 2.93 |
| △NNO | -4.30 | -4.42 | -3.33 | -4.06 | -3.53 | -3.56 | -3.56 | -4.22 | -3.05 |

Table S3. (continued)

| Sample | ZK001-12 |  |  |  |  |  |  |  |  |  |  |
| --- | --- | --- | --- | --- | --- | --- | --- | --- | --- | --- | --- |
| Sample spot | 1 | 2 | 3 | 4 | 5 | 6 | 7 | 8 | ~~9~~ | 10 | 11 |
| wt.% |  |  |  |  |  |  |  |  |  |  |  |
| SiO2 | 32.7 | 32.7 | 32.7 | 32.7 | 32.7 | 32.7 | 32.7 | 32.7 | 32.7 | 32.7 | 32.7 |
| ZrO2 | 44.9 | 46.9 | 40.7 | 43.3 | 45.0 | 42.3 | 44.4 | 47.9 | 38.7 | 45.3 | 44.7 |
| ppm |  |  |  |  |  |  |  |  |  |  |  |
| Ti | 4.1 | 11.1 | 8.0 | 4.1 | 3.9 | 3.3 | 3.0 | 20.1 | 0.8 | 9.0 | 6.3 |
| Y | 1872 | 2106 | 1843 | 1827 | 1825 | 1501 | 1249 | 5892 | 1996 | 1727 | 1970 |
| Nb | 10.92 | 15.62 | 17.08 | 12.73 | 12.81 | 16.99 | 10.20 | 10.17 | 21.62 | 12.09 | 18.99 |
| La | 0.47 | 0.09 | 2.25 | 0.44 | 0.42 | 0.31 | 0.59 | 0.23 | 1.40 | 0.09 | 0.94 |
| Ce | 42.5 | 40.6 | 56.1 | 45.4 | 44.8 | 40.5 | 20.4 | 66.3 | 57.2 | 71.5 | 56.1 |
| Pr | 0.28 | 0.14 | 1.01 | 0.31 | 0.22 | 0.30 | 0.48 | 1.71 | 1.07 | 0.21 | 0.62 |
| Nd | 2.99 | 2.13 | 6.09 | 3.27 | 2.63 | 2.07 | 2.45 | 29.86 | 8.33 | 3.14 | 4.45 |
| Sm | 5.19 | 5.69 | 6.50 | 5.89 | 5.01 | 3.95 | 3.20 | 59.27 | 5.85 | 7.19 | 5.81 |
| Eu | 1.52 | 2.59 | 1.85 | 1.88 | 1.41 | 1.32 | 1.07 | 2.77 | 2.68 | 2.06 | 1.83 |
| Gd | 34.8 | 41.0 | 38.1 | 37.2 | 36.1 | 28.5 | 18.3 | 293.2 | 44.0 | 44.7 | 36.8 |
| Tb | 14.50 | 16.70 | 15.38 | 14.64 | 14.30 | 11.70 | 7.81 | 91.54 | 18.39 | 16.40 | 15.12 |
| Dy | 188 | 212 | 189 | 186 | 185 | 153 | 112 | 893 | 212 | 195 | 195 |
| Ho | 81.6 | 92.8 | 81.0 | 80.5 | 80.6 | 66.3 | 54.0 | 289.0 | 90.1 | 79.1 | 86.2 |
| Er | 373 | 425 | 362 | 365 | 366 | 305 | 262 | 1012 | 392 | 342 | 404 |
| Tm | 94 | 108 | 90 | 91 | 93 | 76 | 69 | 210 | 98 | 81 | 102 |
| Yb | 770 | 884 | 731 | 750 | 760 | 630 | 578 | 1445 | 782 | 639 | 837 |
| Lu | 183.2 | 206.9 | 170.0 | 175.2 | 181.0 | 146.6 | 138.8 | 284.3 | 181.2 | 148.2 | 198.0 |
| Hf | 8780 | 9464 | 7879 | 8331 | 8945 | 8989 | 9452 | 8881 | 8076 | 8212 | 8835 |
| Ta | 7.0 | 9.3 | 10.1 | 7.3 | 7.6 | 11.7 | 7.0 | 5.5 | 12.7 | 6.2 | 10.3 |
| Pb | 214.91 | 205.61 | 248.64 | 250.41 | 231.58 | 275.33 | 188.15 | 145.10 | 318.79 | 151.09 | 239.45 |
| Th | 940 | 841 | 1188 | 1158 | 1042 | 1089 | 453 | 1182 | 1430 | 1046 | 1036 |
| U | 2252 | 2168 | 2582 | 2592 | 2414 | 2922 | 2098 | 1360 | 3307 | 1463 | 2502 |
| Age | 432 | 431 | 432 | 432 | 432 | 432 | 433 | 433 | 429 | 434 | 432 |
| (Sm/La)N | 19.12 | 106.04 | 5.04 | 23.42 | 20.74 | 22.50 | 9.46 | 456.60 | 7.30 | 133.15 | 10.78 |
| Ce/Ce* | 25.95 | 78.70 | 8.29 | 27.56 | 33.15 | 29.95 | 8.54 | 23.73 | 10.44 | 112.84 | 16.43 |
| Zircon Ce4+/Ce3+ | 418 | 374 | 331 | 335 | 467 | 546 | 407 | 7 | 434 | 299 | 481 |
| Eu/Eu* | 0.35 | 0.52 | 0.36 | 0.39 | 0.32 | 0.38 | 0.43 | 0.06 | 0.52 | 0.35 | 0.39 |
| T-Zr-Ti(°C) | 728 | 827 | 791 | 727 | 723 | 707 | 699 | 896 | 599 | 804 | 768 |
| log(fO2) | -16.97 | -14.99 | -15.21 | -17.00 | -17.07 | -17.69 | -18.65 | -12.90 | -20.06 | -14.26 | -15.71 |
| 1σ | 1.43 | 1.14 | 1.21 | 1.44 | 1.46 | 1.62 | 1.74 | 1.03 | 4.30 | 1.15 | 1.28 |
| △NNO | -2.35 | -2.83 | -2.16 | -2.35 | -2.32 | -2.54 | -3.30 | -2.46 | -2.20 | -1.53 | -2.07 |

Table S3. (continued)

| Sample | ZK001-12 |  |  |  |  |  |  |  |  |  |  |
| --- | --- | --- | --- | --- | --- | --- | --- | --- | --- | --- | --- |
| Sample spot | 12 | 13 | 14 | 15 | 16 | 17 | 18 | 19 | 20 | 21 | 22 |
| wt.% |  |  |  |  |  |  |  |  |  |  |  |
| SiO2 | 32.7 | 32.7 | 32.7 | 32.7 | 32.7 | 32.7 | 32.7 | 32.7 | 32.7 | 32.7 | 32.7 |
| ZrO2 | 44.6 | 40.3 | 40.5 | 40.4 | 39.6 | 42.8 | 38.7 | 42.8 | 41.7 | 41.6 | 42.0 |
| ppm |  |  |  |  |  |  |  |  |  |  |  |
| Ti | 3.9 | 5.1 | 7.4 | 8.4 | 2.0 | 5.0 | 4.5 | 5.1 | 3.7 | 7.3 | 5.1 |
| Y | 1917 | 2257 | 1641 | 1704 | 2013 | 1618 | 2088 | 2315 | 1670 | 1965 | 1372 |
| Nb | 11.17 | 17.97 | 17.10 | 16.65 | 14.85 | 16.52 | 18.73 | 15.29 | 14.71 | 12.37 | 13.93 |
| La | 1.21 | 0.83 | 1.42 | 4.19 | 5.13 | 0.96 | 2.76 | 0.14 | 6.55 | 1.57 | 2.65 |
| Ce | 43.8 | 58.5 | 59.3 | 64.7 | 101.9 | 52.9 | 73.8 | 61.4 | 62.2 | 59.8 | 39.0 |
| Pr | 0.85 | 0.64 | 1.88 | 3.78 | 5.72 | 1.16 | 1.65 | 0.18 | 3.28 | 1.52 | 1.49 |
| Nd | 5.59 | 4.92 | 8.21 | 22.65 | 39.33 | 7.30 | 8.47 | 3.18 | 18.36 | 10.46 | 9.13 |
| Sm | 7.08 | 7.48 | 9.88 | 16.64 | 23.82 | 7.69 | 6.92 | 8.77 | 9.50 | 10.38 | 6.19 |
| Eu | 1.75 | 2.08 | 2.32 | 6.09 | 4.15 | 2.43 | 2.47 | 2.33 | 2.24 | 3.39 | 1.50 |
| Gd | 39.0 | 46.5 | 39.8 | 46.6 | 58.4 | 35.0 | 40.8 | 52.5 | 35.2 | 45.6 | 27.1 |
| Tb | 15.58 | 18.60 | 15.56 | 15.68 | 19.70 | 13.62 | 19.37 | 19.92 | 13.61 | 16.72 | 10.90 |
| Dy | 197 | 238 | 193 | 182 | 234 | 167 | 228 | 250 | 172 | 205 | 142 |
| Ho | 83.7 | 100.7 | 75.3 | 72.8 | 92.9 | 71.7 | 95.0 | 106.2 | 73.3 | 85.6 | 61.6 |
| Er | 382 | 459 | 341 | 328 | 412 | 325 | 434 | 468 | 339 | 387 | 282 |
| Tm | 96 | 111 | 84 | 81 | 102 | 80 | 104 | 115 | 86 | 94 | 73 |
| Yb | 783 | 895 | 653 | 664 | 793 | 659 | 805 | 923 | 708 | 766 | 596 |
| Lu | 185.3 | 206.8 | 152.0 | 160.9 | 179.8 | 154.7 | 193.7 | 212.2 | 168.5 | 183.4 | 144.3 |
| Hf | 9109 | 7808 | 8550 | 8832 | 8015 | 8789 | 7893 | 8269 | 8624 | 8150 | 9015 |
| Ta | 6.7 | 10.6 | 10.6 | 10.6 | 9.4 | 10.0 | 10.1 | 8.7 | 8.5 | 7.1 | 9.6 |
| Pb | 230.96 | 317.64 | 283.97 | 279.22 | 298.22 | 234.65 | 304.64 | 259.16 | 254.63 | 225.60 | 230.10 |
| Th | 961 | 1574 | 1251 | 1013 | 1816 | 1075 | 1636 | 1353 | 1036 | 1130 | 788 |
| U | 2449 | 3273 | 2945 | 2965 | 3032 | 2443 | 3035 | 2672 | 2705 | 2385 | 2493 |
| Age | 432 | 432 | 434 | 431 | 430 | 432 | 433 | 432 | 432 | 424 | 430 |
| (Sm/La)N | 10.20 | 15.78 | 12.09 | 6.92 | 8.09 | 13.91 | 4.37 | 112.14 | 2.53 | 11.53 | 4.07 |
| Ce/Ce* | 9.62 | 17.97 | 8.07 | 3.62 | 4.19 | 11.13 | 7.71 | 86.20 | 2.99 | 8.62 | 4.38 |
| Zircon Ce4+/Ce3+ | 239 | 314 | 139 | 59 | 51 | 208 | 432 | 247 | 178 | 154 | 221 |
| Eu/Eu* | 0.33 | 0.34 | 0.36 | 0.67 | 0.34 | 0.46 | 0.45 | 0.33 | 0.38 | 0.48 | 0.36 |
| T-Zr-Ti(°C) | 723 | 747 | 784 | 797 | 667 | 747 | 736 | 747 | 718 | 783 | 748 |
| log(fO2) | -17.08 | -16.27 | -15.35 | -14.86 | -17.19 | -16.23 | -16.05 | -16.08 | -16.60 | -15.23 | -16.62 |
| 1σ | 1.47 | 1.37 | 1.26 | 1.28 | 2.05 | 1.35 | 1.40 | 1.34 | 1.52 | 1.22 | 1.39 |
| △NNO | -2.34 | -2.12 | -2.11 | -1.96 | -1.04 | -2.07 | -1.62 | -1.93 | -1.74 | -1.97 | -2.50 |

Note: T-Zr-Ti, temperature based on titanium-in-zircon thermometer (Ferry & Watson, 2007), with two parameters adapted, aSiO2 = 1.0 and aTiO2 = 0.5. Eu/Eu* = EuN / (SmN × GdN)0.5; Ce/Ce* = CeN / (LaN × PrN)0.5; In there, the subscript ‘N’ indicates chondrite–normalized (Sun & McDonough,1989). The values of Ce4+/Ce3+, log (fO2) and △NNO are calculated based on Ballard *et al.* (2002) and Smythe & Brenan (2015).

**Reference**

**Ferry J and Watson E**  (2007) New thermodynamic models and revised calibrations for the Ti-in-zircon and Zr-in-rutile thermometers. *Contributions to Mineralogy and Petrology* **154**, 429-437.

**Ballard JR, Palin JM and Campbell IH** (2002) Relative oxidation states of magmas inferred from Ce(IV)/Ce(III) in zircon: application to porphyry copper deposits of northern Chile. *Contributions to Mineralogy and Petrology* **144**, 347–364.

**Smythe DJ and Brenan JM**  (2015) Cerium oxidation state in silicate melts: combined fO2, temperature and compositional effects. *Geochimica et Cosmochimica Acta* **170**, 173–187.

**Sun SS and McDonough W**  (1989) Chemical and isotopic systematics of oceanic basalts: Implications for mantle composition and processes. *Geological Society London Special Publications* **42**, 313–345.

Table S4. Major (wt. %) and trace (ppm) element contents and Nd isotopic ratios of granitic rocks in the Xuehuading-Pangshanchong area, South China Block

| Sample | 17XHD  01 | 17XHD  02 | 17XHD  03 | 17XHD  04 | 17XHD  05 | 17XHD  06 | 17XHD  08 | 17XHD  09 | 17XHD  10 | 17XHD  11 | 17XHD  12 | 17XHD  13 |
| --- | --- | --- | --- | --- | --- | --- | --- | --- | --- | --- | --- | --- |
| Pluton | Xuehuading | | | | | | | | | | | |
| Rock type | GD | GD | GD | GD | GD | GD | GD | GD | GD | BG | BG | GD |
| SiO2 | 67.13 | 67.17 | 65.82 | 65.91 | 66.62 | 68.58 | 72.09 | 68.71 | 70.26 | 76.70 | 76.93 |  |
| TiO2 | 0.51 | 0.49 | 0.57 | 0.53 | 0.51 | 0.41 | 0.31 | 0.40 | 0.42 | 0.07 | 0.06 |  |
| Al2O3 | 15.03 | 14.85 | 15.94 | 15.18 | 14.83 | 14.74 | 13.57 | 14.37 | 14.81 | 13.32 | 13.32 |  |
| Fe2O3T | 3.95 | 3.73 | 4.30 | 3.93 | 3.90 | 3.17 | 2.37 | 3.04 | 3.03 | 0.55 | 0.54 |  |
| MnO | 0.07 | 0.07 | 0.08 | 0.07 | 0.07 | 0.06 | 0.04 | 0.06 | 0.06 | 0.02 | 0.02 |  |
| MgO | 1.93 | 1.80 | 2.09 | 1.88 | 1.85 | 1.58 | 1.10 | 1.59 | 1.35 | 0.24 | 0.13 |  |
| CaO | 2.62 | 2.26 | 1.50 | 2.50 | 2.47 | 2.14 | 0.62 | 1.52 | 1.53 | 0.62 | 0.68 |  |
| Na2O | 2.83 | 2.65 | 2.47 | 2.87 | 2.89 | 2.89 | 2.40 | 2.56 | 2.75 | 3.10 | 3.13 |  |
| K2O | 4.42 | 4.97 | 4.82 | 4.85 | 4.59 | 4.82 | 5.26 | 4.60 | 4.34 | 5.57 | 5.45 |  |
| P2O5 | 0.19 | 0.15 | 0.15 | 0.16 | 0.15 | 0.12 | 0.08 | 0.13 | 0.13 | 0.02 | 0.01 |  |
| LOI | 1.19 | 1.28 | 2.07 | 1.21 | 1.29 | 1.07 | 1.31 | 2.29 | 1.80 | 0.56 | 0.41 |  |
| Total | 99.86 | 99.41 | 99.79 | 99.08 | 99.17 | 99.56 | 99.15 | 99.26 | 100.47 | 100.75 | 100.69 |  |
| K2O/Na2O | 1.56 | 1.88 | 1.95 | 1.69 | 1.59 | 1.67 | 2.19 | 1.79 | 1.58 | 1.80 | 1.74 |  |
| A/NK | 1.59 | 1.53 | 1.72 | 1.52 | 1.52 | 1.48 | 1.41 | 1.56 | 1.61 | 1.20 | 1.21 |  |
| A/CNK | 1.06 | 1.07 | 1.33 | 1.05 | 1.04 | 1.06 | 1.26 | 1.20 | 1.24 | 1.09 | 1.08 |  |
| Mg# | 49 | 49 | 49 | 49 | 48 | 50 | 48 | 51 | 47 | 46 | 33 |  |
| V | 75.0 | 70.3 | 68.9 | 71.9 | 78.6 | 67.7 | 40.0 | 64.2 | 75.1 | 4.5 | 2.3 | 67.0 |
| Cr | 37 | 31 | 34 | 36 | 36 | 28 | 18 | 22 | 27 | 2 | 1 | 28 |
| Co | 14.94 | 15.02 | 14.58 | 14.39 | 14.41 | 11.56 | 7.61 | 10.93 | 12.71 | 1.12 | 0.35 | 11.81 |
| Ni | 21.7 | 19.1 | 20.5 | 21.0 | 20.4 | 16.1 | 11.3 | 14.5 | 17.1 | 1.1 | 0.3 | 17.7 |
| Cu | 18.4 | 30.3 | 22.8 | 17.7 | 19.8 | 19.0 | 9.3 | 13.3 | 11.1 | 9.2 | 2.5 | 5.3 |
| Zn | 51 | 42 | 44 | 43 | 53 | 32 | 28 | 38 | 38 | 13 | 14 | 48 |
| Ga | 36.24 | 39.34 | 41.03 | 36.54 | 41.11 | 37.25 | 37.35 | 39.88 | 38.60 | 9.08 | 6.25 | 37.11 |
| Rb | 226 | 229 | 205 | 230 | 225 | 221 | 226 | 230 | 285 | 301 | 294 | 240 |
| Sr | 188 | 170 | 169 | 192 | 212 | 195 | 103 | 112 | 157 | 37 | 23 | 137 |
| Y | 36.98 | 31.62 | 30.84 | 30.04 | 34.63 | 28.07 | 19.82 | 30.16 | 34.08 | 16.74 | 23.02 | 30.74 |
| Zr | 258 | 225 | 207 | 224 | 235 | 172 | 149 | 165 | 215 | 62 | 60 | 199 |
| Nb | 19.4 | 17.0 | 18.7 | 19.0 | 19.1 | 15.3 | 17.2 | 17.8 | 20.0 | 13.6 | 12.4 | 19.0 |
| Ba | 578 | 665 | 662 | 597 | 669 | 595 | 591 | 639 | 616 | 139 | 84 | 603 |
| La | 20.10 | 30.79 | 31.71 | 16.51 | 40.22 | 18.99 | 18.94 | 27.16 | 28.28 | 18.80 | 12.46 | 25.85 |
| Ce | 48.54 | 67.16 | 80.02 | 44.29 | 78.44 | 45.07 | 42.29 | 59.37 | 64.10 | 42.90 | 31.88 | 59.79 |
| Pr | 6.66 | 8.95 | 9.46 | 5.46 | 10.92 | 5.75 | 5.33 | 7.90 | 8.19 | 4.84 | 3.54 | 7.47 |
| Nd | 25.26 | 30.82 | 32.32 | 20.77 | 37.61 | 21.06 | 17.71 | 27.16 | 28.41 | 15.85 | 11.96 | 25.94 |
| Sm | 5.94 | 5.98 | 6.15 | 4.85 | 6.74 | 4.64 | 3.41 | 5.56 | 5.91 | 2.98 | 2.56 | 5.10 |
| Eu | 1.16 | 1.13 | 1.08 | 1.07 | 1.20 | 1.04 | 0.72 | 0.92 | 1.09 | 0.32 | 0.19 | 1.01 |
| Gd | 5.67 | 5.44 | 5.58 | 4.69 | 6.07 | 4.42 | 3.08 | 5.07 | 5.47 | 2.39 | 2.36 | 4.61 |
| Tb | 0.99 | 0.88 | 0.87 | 0.80 | 0.97 | 0.75 | 0.51 | 0.83 | 0.91 | 0.38 | 0.42 | 0.78 |
| Dy | 5.91 | 5.22 | 5.12 | 4.76 | 5.55 | 4.42 | 3.07 | 4.78 | 5.37 | 2.30 | 2.71 | 4.60 |
| Ho | 1.27 | 1.11 | 1.07 | 1.01 | 1.16 | 0.95 | 0.69 | 1.01 | 1.13 | 0.51 | 0.63 | 1.00 |
| Er | 3.66 | 3.12 | 3.14 | 2.92 | 3.34 | 2.70 | 2.09 | 2.85 | 3.26 | 1.68 | 2.09 | 2.91 |
| Tm | 0.57 | 0.48 | 0.48 | 0.46 | 0.51 | 0.42 | 0.35 | 0.44 | 0.51 | 0.31 | 0.39 | 0.48 |
| Yb | 3.66 | 3.03 | 3.14 | 2.90 | 3.22 | 2.70 | 2.43 | 2.87 | 3.37 | 2.24 | 2.82 | 3.23 |
| Lu | 0.56 | 0.47 | 0.50 | 0.46 | 0.50 | 0.41 | 0.39 | 0.43 | 0.52 | 0.38 | 0.50 | 0.52 |
| Hf | 8.09 | 6.81 | 6.43 | 6.71 | 7.05 | 5.08 | 4.84 | 5.29 | 6.92 | 2.93 | 2.97 | 6.41 |
| Ta | 2.23 | 1.88 | 2.41 | 1.93 | 1.97 | 1.63 | 2.87 | 2.38 | 2.64 | 3.20 | 3.28 | 3.12 |
| Pb | 44.9 | 45.4 | 41.6 | 45.4 | 44.4 | 46.9 | 51.3 | 52.2 | 52.4 | 73.3 | 76.4 | 45.3 |
| Th | 18.7 | 31.5 | 29.7 | 20.8 | 30.6 | 21.9 | 29.9 | 26.5 | 31.6 | 32.7 | 27.6 | 28.7 |
| U | 7.17 | 6.48 | 7.58 | 6.17 | 6.50 | 5.55 | 8.41 | 9.26 | 7.09 | 16.11 | 19.78 | 7.45 |
| Eu/Eu* | 0.61 | 0.61 | 0.57 | 0.70 | 0.58 | 0.71 | 0.69 | 0.53 | 0.59 | 0.37 | 0.25 | 0.64 |
| T-Zrn(°C) | 871 | 856 | 860 | 854 | 860 | 832 | 829 | 836 | 866 | 749 | 747 |  |
| 143Nd/144Nd | 0.512060 |  |  |  |  | 0.512069 | 0.512044 |  |  | 0.512013 | 0.512063 |  |
| (2σ) | 0.000003 |  |  |  |  | 0.000003 | 0.000003 |  |  | 0.000003 | 0.000004 |  |
| 147Sm/144Nd | 0.142142 |  |  |  |  | 0.133274 | 0.116221 |  |  | 0.113752 | 0.129093 |  |
| (143Nd/144Nd)i | 0.511658 |  |  |  |  | 0.511692 | 0.511715 |  |  | 0.511691 | 0.511698 |  |
| εNd(t) | -8.28 |  |  |  |  | -7.60 | -7.15 |  |  | -7.62 | -7.49 |  |
| T2DM | 1.84 |  |  |  |  | 1.79 | 1.75 |  |  | 1.79 | 1.78 |  |

Table S4. (continued)

| Sample | 17XHD14 | 17XHD  13(duplicate) | 17XHD  03(duplicate) | ZK001-  12 | ZK10001-  09 | D124-  3* | D135-  1* | D136-  1* | D124-  2* | D136-  2* | D136-  3* |
| --- | --- | --- | --- | --- | --- | --- | --- | --- | --- | --- | --- |
| Pluton | Xuehuading | | | Pangshanchong | | Xuehuading | | | | | |
| Rock type | GD | GD | GD | GD | BG dyke | GD | GD | GD | ME | ME | ME |
| SiO2 | 65.96 | 67.99 | 65.61 | 67.91 | 75.69 | 71.29 | 69.64 | 69.09 | 63.56 | 67.26 | 57.18 |
| TiO2 | 0.50 | 0.44 | 0.57 | 0.42 | 0.03 | 0.43 | 0.43 | 0.45 | 0.78 | 0.50 | 0.96 |
| Al2O3 | 15.41 | 14.98 | 15.86 | 14.88 | 12.91 | 13.44 | 14.13 | 14.10 | 15.60 | 14.28 | 16.13 |
| Fe2O3T | 3.79 | 3.27 | 4.31 | 3.39 | 0.37 | 4.19 | 4.80 | 4.94 | 6.10 | 5.38 | 9.24 |
| MnO | 0.07 | 0.06 | 0.08 | 0.07 | 0.01 | 0.07 | 0.08 | 0.08 | 0.10 | 0.08 | 0.12 |
| MgO | 1.73 | 1.44 | 2.08 | 2.08 | 0.25 | 1.35 | 1.49 | 1.80 | 2.78 | 1.84 | 3.79 |
| CaO | 2.94 | 2.19 | 1.50 | 2.15 | 0.65 | 2.14 | 2.66 | 2.41 | 3.23 | 2.36 | 2.56 |
| Na2O | 2.91 | 2.67 | 2.48 | 2.88 | 2.66 | 2.79 | 3.10 | 2.93 | 3.92 | 2.93 | 4.74 |
| K2O | 4.31 | 4.71 | 4.80 | 4.24 | 5.85 | 4.62 | 4.03 | 4.56 | 2.15 | 4.42 | 1.95 |
| P2O5 | 0.15 | 0.13 | 0.15 | 0.14 | 0.01 | 0.11 | 0.12 | 0.13 | 0.21 | 0.15 | 0.38 |
| LOI | 1.28 | 1.35 | 2.38 | 1.60 | 0.84 | 0.20 | 0.62 | 0.56 | 0.82 | 0.70 | 2.86 |
| Total | 99.03 | 99.22 | 99.82 | 99.91 | 99.30 | 98.93 | 99.40 | 99.45 | 98.66 | 99.43 | 99.29 |
| K2O/Na2O | 1.48 | 1.76 | 1.94 | 1.47 | 2.20 |  |  |  |  |  |  |
| A/NK | 1.63 | 1.58 | 1.71 | 1.60 | 1.21 |  |  |  |  |  |  |
| A/CNK | 1.04 | 1.11 | 1.32 | 1.12 | 1.09 | 1.00 | 0.99 | 1.00 | 1.06 | 1.03 | 1.11 |
| Mg# | 47 | 47 | 49 | 55 | 57 | 39 | 38 | 42 | 47 | 40 | 45 |
| V | 71.0 | 68.0 | 76.6 | 73.0 | 5.0 |  |  |  |  |  |  |
| Cr | 35 | 30 | 37 | 30 | 10 | 19 | 24 | 51 | 36 | 32 | 13 |
| Co | 13.60 | 12.07 | 15.89 |  |  |  |  |  |  |  |  |
| Ni | 20.1 | 17.9 | 22.2 |  |  | 14.1 | 18.9 | 28.6 | 29.2 | 21.1 | 28.6 |
| Cu | 22.0 | 5.9 | 24.6 |  |  |  |  |  |  |  |  |
| Zn | 45 | 48 | 55 |  |  |  |  |  |  |  |  |
| Ga | 37.54 | 36.78 | 43.44 | 19.10 | 12.10 |  |  |  |  |  |  |
| Rb | 221 | 246 | 230 | 246 | 268 | 244 | 270 | 253 | 196 | 247 | 174 |
| Sr | 157 | 137 | 192 | 173 | 77 | 104 | 109 | 137 | 184 | 132 | 114 |
| Y | 30.23 | 31.84 | 34.57 |  |  | 25.56 | 28.82 | 25.73 | 38.21 | 23.63 | 42.23 |
| Zr | 214 | 199 | 230 | 173 | 95 | 161 | 172 | 173 | 212 | 189 | 252 |
| Nb | 17.9 | 19.2 | 20.8 | 11.7 | 7.3 | 11.2 | 15.2 | 12.5 | 18.4 | 13.1 | 28.0 |
| Ba | 600 | 590 | 711 | 611 | 245 | 481.1 | 459.3 | 630.5 | 310.6 | 640.3 | 293 |
| La | 28.21 | 37.32 | 34.26 | 21.70 | 4.00 | 35.40 | 29.49 | 25.41 | 41.46 | 26.78 | 44.71 |
| Ce | 61.04 | 79.91 | 79.65 | 46.60 | 6.90 | 74.70 | 62.19 | 54.80 | 87.50 | 57.18 | 87.78 |
| Pr | 8.28 | 10.34 | 10.31 | 5.56 | 0.73 | 8.42 | 7.27 | 6.35 | 10.01 | 6.59 | 10.82 |
| Nd | 28.78 | 34.00 | 35.64 | 20.90 | 2.80 | 30.33 | 26.24 | 23.89 | 37.71 | 24.58 | 39.92 |
| Sm | 5.71 | 6.06 | 6.77 | 4.57 | 0.73 | 5.33 | 4.94 | 4.59 | 7.21 | 4.50 | 7.11 |
| Eu | 1.14 | 1.04 | 1.19 | 0.84 | 0.47 | 0.76 | 0.76 | 0.78 | 0.80 | 0.83 | 0.77 |
| Gd | 4.97 | 5.23 | 5.87 | 3.99 | 0.93 | 4.20 | 4.31 | 4.11 | 6.16 | 3.70 | 5.94 |
| Tb | 0.82 | 0.83 | 0.94 | 0.63 | 0.18 | 0.70 | 0.72 | 0.67 | 1.03 | 0.61 | 0.99 |
| Dy | 4.74 | 4.70 | 5.48 | 3.52 | 1.33 | 3.94 | 4.20 | 3.96 | 5.96 | 3.67 | 6.05 |
| Ho | 1.02 | 1.02 | 1.16 | 0.71 | 0.32 | 0.83 | 0.89 | 0.80 | 1.22 | 0.72 | 1.29 |
| Er | 2.86 | 3.06 | 3.34 | 1.97 | 1.19 | 2.35 | 2.59 | 2.30 | 3.40 | 2.16 | 3.90 |
| Tm | 0.45 | 0.49 | 0.52 | 0.27 | 0.21 | 0.37 | 0.43 | 0.37 | 0.52 | 0.34 | 0.63 |
| Yb | 2.89 | 3.31 | 3.45 | 1.72 | 1.72 | 2.52 | 2.88 | 2.51 | 3.44 | 2.21 | 4.40 |
| Lu | 0.45 | 0.53 | 0.54 | 0.26 | 0.32 | 0.39 | 0.45 | 0.41 | 0.53 | 0.35 | 0.69 |
| Hf | 6.50 | 6.42 | 6.84 | 5.40 | 4.90 | 5.48 | 5.69 | 5.56 | 6.42 | 5.77 | 7.73 |
| Ta | 1.96 | 3.16 | 2.56 | 1.50 | 1.80 | 1.81 | 2.97 | 1.95 | 2.50 | 1.68 | 4.25 |
| Pb | 40.4 | 47.0 | 46.2 |  |  |  |  |  |  |  |  |
| Th | 23.2 | 33.3 | 32.0 | 25.6 | 34.2 | 34.3 | 29.7 | 25.3 | 23.4 | 26.7 | 21.6 |
| U | 7.94 | 7.57 | 8.11 | 5.70 | 37.60 | 10.38 | 10.14 | 9.84 | 14.06 | 8.49 | 7.80 |
| Eu/Eu* | 0.66 | 0.57 | 0.58 | 0.61 | 1.76 | 0.50 | 0.51 | 0.55 | 0.37 | 0.63 | 0.37 |
| T-Zrn(°C) | 850 | 848 | 871 | 837 | 782 | 824 | 831 | 829 | 858 | 838 | 873 |
| 143Nd/144Nd | 0.512070 |  |  | 0.512002 |  | 0.511945 | 0.511961 | 0.511996 | 0.512010 | 0.512002 | 0.512130 |
| (2σ) | 0.000004 |  |  | 0.000006 |  |  |  |  |  |  |  |
| 147Sm/144Nd | 0.119957 |  |  | 0.132193 |  | 0.108000 | 0.114800 | 0.113400 | 0.116800 | 0.111900 | 0.121300 |
| (143Nd/144Nd)i | 0.511731 |  |  | 0.511628 |  | 0.511654 | 0.511636 | 0.511676 | 0.511680 | 0.511686 | 0.511787 |
| εNd(t) | -6.85 |  |  | -8.86 |  | -8.34 | -8.69 | -7.93 | -7.85 | -7.73 | -5.75 |
| T2DM | 1.73 |  |  | 1.90 |  | 1.86 | 1.89 | 1.83 | 1.82 | 1.81 | 1.65 |

Note: GD, granodiorite; BG, biotite granite; ME, microgranular enclave, LOI, Loss on Ignition; Fe2O3T , Total Fe2O3 content; A/CNK, the molecular ratio of Al2O3 / (Na2O + K2O + CaO); A/NK, the molecular ratio of Al2O3 / (Na2O + K2O); Mg# = 100 × Mg2+ / (Mg2+ + Fe2+); Eu/Eu* = EuN / (SmN × GdN)0.5; (143Nd/144Nd)i = (143Nd/144Nd)S – (147Sm/144Nd)S × (eλT – 1); 147Sm/144Nd = (Sm/Nd) × 0.60456; λSm-Nd = 0.00654 Ga-1; εNd(t) = ((143Nd/144Nd)S(t) / (143Nd/144Nd)CHUR(t) – 1) × 104; (143Nd/144Nd)CHUR(t) = 0.512638 – 0.1967 × (eλt – 1); TDM (Ga) = 1/λ × ln{1 + (((143Nd/144Nd)S – 0.51315) / ((147Sm/144Nd)S–0.2137))}; T2DM = TDM − (TDM − T) × ((fC C – fS) / (fC C −fDM)). T-Zrn(°C), zircon saturation temperature were calculated using the *Watson & Harrison* (1983) thermometer. The symbol (*) refers to the data from *Cheng et al.* (2009) and *Fu et al.* (2004).

Where fC C and fDM are the fSm/Nd values of the continental crust and the depleted mantle; subscript S= analyzed sample, CHUR= chondritic uniform reservoir; DM= depleted mantle; t= 432 Ma, crystallization of the studied granitic rocks; λ = 1.867 × 10−11 year−1. TDM represents the model age calculated from the measured 143Nd/144Nd and 147Sm/144Nd ratios; whereas T2DM, a “crust Nd model age”, is derived from projecting the initial 143Nd/144Nd with a Sm/Nd ratio corresponding to the continental crust back to the depleted mantle model growth curve. Thus, T2DM can represent the mean crustal residence age of the source material extracted from the depleted mantle. The whole rock εNd(t) values have been calculated at 432 Ma on the basis of the zircon U-Pb ages for these rocks.

**Reference**

**Cheng SB, Fu JM, Xu DM, Ma LY, Pang YC and Cao L** (2009) Geochemical characteristics and jpetrogenensis of Xuehuading granitic batholith and its Enclaves, South China. *Geotectonica et Metallogenia* **33**, 588–597. (In Chineses with English abstract)

**Fu JM, Ma CQ, Xie CF, Zhang YM and Peng SB** (2004) SHRIMP U–Pb zircon dating of the Jiuyishan composite granite in Hunan and its geological significance.*Geotectonica et Metallogenia* **28**, 370–378. (In Chineses with English abstract)

**Watson EB and Harrison TM** (1983) Zircon saturation revisited: Temperature and composition effects in a variety of crustal magma types. *Earth and Planetary Science Letters* **64**, 295–304.

Table S5. Hf isotopic zircon data of the granitic rocks in the Xuehuading-Pangshanchong area, South China Block.

| **Sample** | **Spots** | **176Yb/177Hf** | **176Lu/177Hf** | **176Hf/177Hf** | **2σ** | **176Hf/177Hfi** | **εHf(0)** | **εHf(t)** | **2σ** | **TDM (Ma)** | **TDMC (Ma)** | **fLu/Hf** | **t (Ma)** |
| --- | --- | --- | --- | --- | --- | --- | --- | --- | --- | --- | --- | --- | --- |
| 17XHD06-44 | 01 | 0.021992 | 0.000846 | 0.282372 | 0.000012 | 0.282365 | -14.40 | -4.91 | 0.41 | 1240 | 1733 | -0.97 | 432 |
|  | 02 | 0.025297 | 0.000979 | 0.282332 | 0.000013 | 0.282325 | -15.82 | -6.33 | 0.46 | 1299 | 1823 | -0.97 | 432 |
|  | 03 | 0.020411 | 0.000814 | 0.282365 | 0.000014 | 0.282359 | -14.62 | -5.12 | 0.50 | 1248 | 1746 | -0.98 | 432 |
|  | 04 | 0.018891 | 0.000750 | 0.282316 | 0.000014 | 0.282310 | -16.35 | -6.86 | 0.50 | 1314 | 1856 | -0.98 | 432 |
|  | 05 | 0.020861 | 0.000837 | 0.282344 | 0.000016 | 0.282337 | -15.39 | -5.90 | 0.57 | 1279 | 1795 | -0.97 | 432 |
|  | 06 | 0.016987 | 0.000659 | 0.282099 | 0.000015 | 0.282091 | -24.09 | -9.83 | 0.52 | 1611 | 2211 | -0.98 | 648 |
|  | 07 | 0.035811 | 0.001344 | 0.282379 | 0.000012 | 0.282368 | -14.29 | -4.79 | 0.43 | 1246 | 1725 | -0.96 | 432 |
|  | 08 | 0.022586 | 0.000900 | 0.282358 | 0.000016 | 0.282351 | -14.89 | -5.37 | 0.56 | 1260 | 1763 | -0.97 | 433 |
|  | 09 | 0.025940 | 0.001019 | 0.282325 | 0.000014 | 0.282317 | -16.11 | -6.59 | 0.48 | 1311 | 1840 | -0.97 | 433 |
|  | 10 | 0.018248 | 0.000710 | 0.282379 | 0.000012 | 0.282373 | -14.10 | -4.63 | 0.41 | 1225 | 1714 | -0.98 | 431 |
| 17XHD08 | 01 | 0.024878 | 0.000976 | 0.282332 | 0.000014 | 0.282324 | -15.84 | -6.35 | 0.51 | 1299 | 1824 | -0.97 | 432 |
|  | 02 | 0.032025 | 0.001339 | 0.282330 | 0.000013 | 0.282319 | -16.00 | -6.51 | 0.46 | 1314 | 1834 | -0.96 | 432 |
|  | 03 | 0.031553 | 0.001161 | 0.282137 | 0.000012 | 0.282128 | -22.79 | -13.30 | 0.44 | 1579 | 2260 | -0.97 | 432 |
|  | 04 | 0.022982 | 0.000884 | 0.282352 | 0.000015 | 0.282345 | -15.10 | -5.72 | 0.55 | 1268 | 1780 | -0.97 | 427 |
|  | 05 | 0.024664 | 0.000973 | 0.282359 | 0.000014 | 0.282351 | -14.90 | -5.40 | 0.51 | 1262 | 1764 | -0.97 | 432 |
|  | 06 | 0.022435 | 0.000863 | 0.282369 | 0.000014 | 0.282360 | -14.55 | -3.25 | 0.51 | 1244 | 1692 | -0.97 | 514 |
|  | 07 | 0.011489 | 0.000495 | 0.281403 | 0.000023 | 0.281399 | -48.56 | -39.08 | 0.83 | 2551 | 3850 | -0.99 | 433 |
|  | 08 | 0.033469 | 0.001316 | 0.282339 | 0.000015 | 0.282328 | -15.70 | -6.25 | 0.53 | 1302 | 1816 | -0.96 | 430 |
|  | 09 | 0.043445 | 0.001798 | 0.282401 | 0.000016 | 0.282386 | -13.63 | -4.14 | 0.57 | 1230 | 1684 | -0.95 | 432 |
|  | 10 | 0.022460 | 0.000901 | 0.282370 | 0.000015 | 0.282363 | -14.47 | -4.98 | 0.53 | 1244 | 1737 | -0.97 | 432 |
| 17XHD12 | 01 | 0.032329 | 0.001294 | 0.282398 | 0.000014 | 0.282387 | -13.60 | -4.11 | 0.50 | 1217 | 1682 | -0.96 | 432 |
|  | 02 | 0.033011 | 0.001276 | 0.282351 | 0.000015 | 0.282340 | -15.26 | -5.77 | 0.53 | 1283 | 1787 | -0.96 | 432 |
|  | 03 | 0.024038 | 0.000946 | 0.282346 | 0.000012 | 0.282338 | -15.35 | -5.85 | 0.44 | 1279 | 1793 | -0.97 | 432 |
|  | 04 | 0.021904 | 0.000859 | 0.282372 | 0.000012 | 0.282365 | -14.39 | -4.90 | 0.44 | 1240 | 1732 | -0.97 | 432 |
|  | 05 | 0.033559 | 0.001297 | 0.282339 | 0.000012 | 0.282328 | -15.69 | -6.20 | 0.43 | 1301 | 1814 | -0.96 | 432 |
|  | 06 | 0.036171 | 0.001400 | 0.282324 | 0.000014 | 0.282312 | -16.26 | -6.77 | 0.49 | 1326 | 1850 | -0.96 | 432 |
|  | 07 | 0.030617 | 0.001180 | 0.282340 | 0.000015 | 0.282330 | -15.63 | -6.12 | 0.53 | 1296 | 1810 | -0.96 | 433 |
|  | 08 | 0.031989 | 0.001396 | 0.282394 | 0.000014 | 0.282384 | -13.70 | -5.29 | 0.51 | 1226 | 1719 | -0.96 | 383 |
|  | 09 | 0.027685 | 0.001124 | 0.282355 | 0.000014 | 0.282346 | -15.07 | -5.78 | 0.51 | 1272 | 1780 | -0.97 | 423 |
|  | 10 | 0.040696 | 0.001563 | 0.282394 | 0.000017 | 0.282382 | -13.80 | -4.31 | 0.60 | 1231 | 1695 | -0.95 | 432 |
| ZK001-12 | 01 | 0.043676 | 0.001679 | 0.282350 | 0.000015 | 0.282336 | -15.41 | -5.91 | 0.54 | 1298 | 1796 | -0.95 | 432 |
|  | 02 | 0.035821 | 0.001411 | 0.282252 | 0.000015 | 0.282240 | -18.81 | -9.34 | 0.52 | 1428 | 2011 | -0.96 | 431 |
|  | 03 | 0.038829 | 0.001531 | 0.282357 | 0.000015 | 0.282345 | -15.11 | -5.62 | 0.54 | 1283 | 1777 | -0.95 | 432 |
|  | 04 | 0.035614 | 0.001418 | 0.282331 | 0.000015 | 0.282319 | -16.02 | -6.53 | 0.52 | 1317 | 1835 | -0.96 | 432 |
|  | 05 | 0.036398 | 0.001401 | 0.282345 | 0.000013 | 0.282334 | -15.49 | -5.99 | 0.46 | 1295 | 1801 | -0.96 | 432 |
|  | 06 | 0.029201 | 0.001154 | 0.282335 | 0.000013 | 0.282325 | -15.79 | -6.30 | 0.46 | 1302 | 1820 | -0.97 | 432 |
|  | 07 | 0.034906 | 0.001333 | 0.282349 | 0.000016 | 0.282338 | -15.33 | -5.82 | 0.56 | 1287 | 1791 | -0.96 | 433 |
|  | 08 | 0.047223 | 0.001714 | 0.282293 | 0.000014 | 0.282279 | -17.42 | -7.92 | 0.48 | 1381 | 1923 | -0.95 | 433 |
|  | 09 | 0.044342 | 0.001709 | 0.282321 | 0.000015 | 0.282308 | -16.42 | -6.99 | 0.52 | 1340 | 1862 | -0.95 | 429 |
|  | 10 | 0.032022 | 0.001248 | 0.282375 | 0.000016 | 0.282365 | -14.41 | -4.87 | 0.55 | 1249 | 1732 | -0.96 | 434 |

**Note:**εHf(T) = ((176Hf/177Hf)Z / (176Hf/177Hf)CHUR(t)-1) × 10,000; 176Hf/177HfCHUR(T) = 176Hf/177HfCHUR(0) - 176Lu/177HfCHUR × (eλT - 1)

TDM = (1 / λ) × ln(1+(176Hf/177HfDM - 176Hf/177HfZ)/(176Lu/177HfDM - 176Lu/177HfZ)); TDMC = TDM - (TDM - T) × ((fCC- fZ) / (fCC- fDM)); fLu/Hf = 176Hf/177HfZ / 176Lu/177HfCHUR-1, where fCC, fZircon and fDM are the fLu/Hf values of the continental crust, zircon sample and the depleted mantle; subscript Z = analyzed zircon sample, CHUR = chondritic uniform reservoir; DM = depleted mantle; T = Zircon U-Pb age of sample; λ = 1.867×10-11 year-1, decay constant of 176Lu (Söderlund *et al.,* 2004); 176Hf/177HfDM = 0.28325; 176Lu/177HfDM = 0.0384; present-day 176Hf/177HfCHUR(0) = 0.282772; 176Hf/177HfCHUR = 0.0332; 176Hf/177HfCC= 0.015.

**Reference**

**Söderlund U, Patchett PJ, Vervoort JD and Isachsen CE** (2004) The176Lu decay constant determined by Lu–Hf and U–Pb isotope systematics of Precambrian mafic intrusions. *Earth and Planetary Science Letters* **219**, 311-324.

Table S6. Thermobarometric conditions calculated for the granitic rocks in the Xuehuading-Pangshanchong area, South China Block.

| Sample | Rock type | **Biotite** spot | Ti | Fe3+ | Fe2+ | Mg | AlIV+AlVI | P-Bt | T-Bt | log(fO2)-Bt | ∆NNO-Bt |
| --- | --- | --- | --- | --- | --- | --- | --- | --- | --- | --- | --- |
| 17XHD01 | GD | 17XHD01-C1-09 | 0.227 | 0.227 | 1.190 | 1.143 | 1.214 | 0.83 | 790 | -13.99 | -0.03 |
|  |  | 17XHD01-C1-10 | 0.246 | 0.218 | 1.201 | 1.141 | 1.220 | 0.86 | 799 | -13.76 | -0.01 |
|  |  | 17XHD01-C1-11 | 0.241 | 0.216 | 1.192 | 1.144 | 1.203 | 0.76 | 798 | -13.81 | -0.02 |
|  |  | 17XHD01-C2-01 | 0.231 | 0.314 | 1.046 | 1.092 | 1.179 | 0.62 | 792 | -13.97 | -0.05 |
|  |  | 17XHD01-C2-02 | 0.224 | 0.213 | 1.202 | 1.147 | 1.266 | 1.14 | 789 | -13.98 | 0.01 |
| 17XHD02 | GD | 17XHD02-C1-04 | 0.237 | 0.214 | 1.218 | 1.138 | 1.218 | 0.85 | 794 | -13.88 | -0.02 |
|  |  | 17XHD02-C1-05 | 0.237 | 0.232 | 1.222 | 1.148 | 1.172 | 0.57 | 794 | -13.92 | -0.06 |
|  |  | 17XHD02-C1-06 | 0.234 | 0.230 | 1.201 | 1.143 | 1.187 | 0.66 | 793 | -13.94 | -0.05 |
| 17XHD03 | GD | 17XHD03-C1-03 | 0.202 | 0.225 | 1.313 | 1.208 | 1.250 | 1.04 | 775 | -14.37 | -0.04 |
| 17XHD04 | GD | 17XHD04-C1-01 | 0.228 | 0.255 | 1.177 | 1.096 | 1.155 | 0.47 | 788 | -14.10 | -0.08 |
|  |  | 17XHD04-C1-02 | 0.240 | 0.228 | 1.236 | 1.097 | 1.201 | 0.75 | 793 | -13.92 | -0.03 |
| 17XHD06 | GD | 17XHD06-C1-02 | 0.234 | 0.234 | 1.159 | 1.172 | 1.219 | 0.86 | 796 | -13.84 | -0.01 |
|  |  | 17XHD06-C2-02 | 0.248 | 0.213 | 1.228 | 1.117 | 1.203 | 0.76 | 798 | -13.79 | -0.02 |
| 17XHD13 | GD | 17XHD13-C1-04 | 0.223 | 0.193 | 1.335 | 1.103 | 1.199 | 0.74 | 783 | -14.21 | -0.06 |
|  |  | 17XHD13-C1-05 | 0.230 | 0.178 | 1.355 | 1.068 | 1.203 | 0.76 | 785 | -14.16 | -0.05 |
|  |  | 17XHD13-C1-06 | 0.243 | 0.249 | 1.231 | 1.073 | 1.162 | 0.51 | 793 | -13.97 | -0.07 |
|  |  | 17XHD13-C1-07 | 0.238 | 0.191 | 1.347 | 1.082 | 1.186 | 0.66 | 789 | -14.05 | -0.06 |
|  |  | 17XHD13-C1-08 | 0.238 | 0.194 | 1.330 | 1.073 | 1.185 | 0.65 | 789 | -14.04 | -0.06 |
|  |  | 17XHD13-C1-09 | 0.230 | 0.241 | 1.260 | 1.052 | 1.191 | 0.69 | 785 | -14.16 | -0.06 |
|  |  | 17XHD13-C1-10 | 0.245 | 0.200 | 1.290 | 1.091 | 1.163 | 0.52 | 794 | -13.93 | -0.06 |
|  |  | 17XHD13-C1-11 | 0.230 | 0.202 | 1.362 | 1.069 | 1.172 | 0.57 | 784 | -14.21 | -0.08 |
|  |  | 17XHD13-C3-03 | 0.223 | 0.226 | 1.266 | 1.086 | 1.169 | 0.56 | 784 | -14.22 | -0.08 |
|  |  | 17XHD13-C3-04 | 0.247 | 0.216 | 1.271 | 1.077 | 1.171 | 0.57 | 795 | -13.91 | -0.06 |
|  |  | 17XHD13-C3-07 | 0.226 | 0.176 | 1.354 | 1.105 | 1.149 | 0.43 | 785 | -14.20 | -0.10 |
|  |  | 17XHD13-C3-08 | 0.218 | 0.179 | 1.347 | 1.098 | 1.193 | 0.70 | 780 | -14.29 | -0.07 |
|  |  | 17XHD13-C3-09 | 0.198 | 0.210 | 1.299 | 1.118 | 1.211 | 0.81 | 771 | -14.54 | -0.09 |
|  |  | 17XHD13-C3-10 | 0.220 | 0.196 | 1.325 | 1.110 | 1.169 | 0.55 | 782 | -14.27 | -0.09 |
| ZK001-12 |  | ZK001-12-C2-01 | 0.203 | 0.236 | 0.916 | 1.388 | 1.229 | 0.92 | 797 | -13.79 | 0.00 |

Notes: GD, granodiorite. (AlIV+AlVI), Ti, Fe3+, Fe2+ and Mg values are calculated cations in biotite; Pressures of biotite PBt (kbar)= 3.03 × 2 × (AlIV+AlVI)-6.53, from Uchida *et al.* (2007); temperatures TBt of biotite are calculated using geothermometer by Henry (2005): T (°C) ==(((ln(2×Ti)-(-2.3594)-(-1.7283)×(Mg/(Mg+Fe3++Fe2+))3)/(4.6482×10-9))0.333; oxygen fugacity (fO2) values are calculated by the method of Wones (1989): log(fO2)= -30930/(T+273.15) + 14.98+0.142 × (P × 1000-1)/T, with P in kbar and T in °C.

**Reference**

**Henry DJ, Guidotti CV and Thomson JA** (2005), The Ti–saturation surface for low–to–medium pressure metapelitic biotites: Implications for geothermometry and Ti–substitution mechanisms. *American Mineralogist* **90**, 316–328.

**Uchida E, Endo S and Makino M** (2007), Relationship Between Solidification Depth of Granitic Rocks and Formation of Hydrothermal Ore Deposits. *Resource Geology* **57**, 47–56.

**Wones DR** (1989) Significanceof the assemblagetitanite + magnetite + quartz in granitic rocks. *American Mineralogist* **74**, 744-749.

Table S6. (continued)

| Sample | 17XHD01 |  |  |  |  |  |  | 17XHD02 |  | 17XHD03 |  | 17XHD04 |  | 17XHD06 |
| --- | --- | --- | --- | --- | --- | --- | --- | --- | --- | --- | --- | --- | --- | --- |
| Rock type | GD |  |  |  |  |  |  | GD |  | GD |  | GD |  | GD |
| **Amphibole** spot | 17XHD01-C1-03 | 17XHD01-C1-04 | 17XHD01-C1-06 | 17XHD01-C2-04 | 17XHD01-C2-05 | 17XHD01-C2-06 | 17XHD01-C2-07 | 17XHD02-C1-02 | 17XHD02-C1-03 | 17XHD03-C1-01 | 17XHD03-C1-02 | 17XHD04-C1-03 | 17XHD04-C1-04 | 17XHD06-C1-01 |
| Genetic type | Magmatic | Magmatic | Magmatic | Magmatic | Magmatic | Magmatic | Magmatic | Magmatic | Magmatic | Magmatic | Magmatic | Magmatic | Magmatic | Magmatic |
| Ca+AlIV | 2.55 | 2.69 | 2.73 | 2.76 | 2.69 | 2.71 | 2.89 | 2.74 | 2.64 | 2.82 | 2.52 | 2.75 | 2.63 | 2.59 |
| Altotal | 1.07 | 1.11 | 1.18 | 1.11 | 1.14 | 1.13 | 1.31 | 1.16 | 1.16 | 1.35 | 0.94 | 1.11 | 1.02 | 1.01 |
| Fe# | 0.50 | 0.51 | 0.51 | 0.50 | 0.51 | 0.50 | 0.52 | 0.50 | 0.51 | 0.51 | 0.48 | 0.51 | 0.51 | 0.49 |
| Fe3+# | 0.24 | 0.24 | 0.23 | 0.23 | 0.23 | 0.24 | 0.21 | 0.24 | 0.24 | 0.21 | 0.29 | 0.24 | 0.25 | 0.28 |
| Plagioclase spot | 17XHD01-C2-09 | 17XHD01-C2-09 | 17XHD01-C2-09 | 17XHD01-C2-09 | 17XHD01-C2-09 | 17XHD01-C2-09 | 17XHD01-C2-09 | 17XHD02-C1-08 | 17XHD02-C1-08 | 17XHD02-C1-08 | 17XHD02-C1-08 | 17XHD02-C1-08 | 17XHD02-C1-08 | 17XHD06-C1-04 |
| XAn | 24 | 24 | 24 | 24 | 24 | 24 | 24 | 18 | 18 | 18 | 18 | 18 | 18 | 17 |
| XAb | 74 | 74 | 74 | 74 | 74 | 74 | 74 | 81 | 81 | 81 | 81 | 81 | 81 | 79 |
| T-Amp (°C) | 697 | 684 | 683 | 696 | 694 | 708 | 703 | 652 | 670 | 705 | 690 | 753 | 704 | 700 |
| P-Amp (Kbar) | 1.86 | 2.16 | 2.47 | 2.04 | 2.22 | 2.01 | 2.93 | 2.60 | 2.49 | 2.91 | 1.27 | 1.18 | 1.53 | 1.50 |
| ∆NNO-S | 0.12 | 0.09 | -0.05 | 0.20 | 0.01 | 0.12 | -0.47 | 0.18 | -0.02 | -0.32 | 0.82 | -0.10 | 0.13 | 0.52 |
| ∆NNO-R | 0.69 | 0.54 | 0.41 | 0.61 | 0.57 | 0.42 | 0.13 | 0.56 | 0.45 | 0.38 | 0.83 | 0.43 | 0.61 | 0.72 |
| logfO2-R | -14.56 | -14.41 | -14.30 | -14.12 | -14.26 | -14.35 | -13.96 | -14.17 | -14.48 | -13.85 | -14.78 | -14.41 | -14.65 | -14.63 |
| H2Omelt-R (wt.%) | 5.02 | 5.81 | 5.65 | 5.27 | 5.62 | 5.49 | 5.38 | 5.60 | 5.52 | 5.60 | 5.59 | 5.43 | 5.42 | 5.91 |

Table S6. (continued)

| Sample | 17XHD06 | 17XHD08 | 17XHD13 |  |  |  |  |  | ZK001-12 | 17XHD01 |  |  | 17XHD02 | 17XHD08-01 |
| --- | --- | --- | --- | --- | --- | --- | --- | --- | --- | --- | --- | --- | --- | --- |
| Rock type | GD | GD | GD |  |  |  |  |  | GD | GD |  |  | GD | GD |
| **Amphibole** spot | 17XHD06-C2-01 | 17XHD08-01-C2-01 | 17XHD13-C1-01 | 17XHD13-C1-02 | 17XHD13-C2-01 | 17XHD13-C2-02 | 17XHD13-C3-01 | 17XHD13-C3-02 | ZK001-12-C1-01 | 17XHD01-C1-05 | 17XHD01-C1-07 | 17XHD01-C2-03 | 17XHD02-C1-01 | 17XHD08-01-C1-01 |
| Genetic type | Magmatic | Magmatic | Magmatic | Magmatic | Magmatic | Magmatic | Magmatic | Magmatic | Magmatic | Fluid-influenced | Fluid-influenced | Fluid-influenced | Fluid-influenced | Fluid-influenced |
| Ca+AlIV | 2.65 | 2.66 | 2.76 | 2.70 | 2.90 | 2.91 | 3.10 | 2.92 | 3.36 | 2.04 | 2.01 | 1.84 | 2.03 | 2.46 |
| Altotal | 1.13 | 1.07 | 1.13 | 1.06 | 1.36 | 1.22 | 1.59 | 1.33 | 1.76 | 0.30 | 0.38 | 0.26 | 0.37 | 0.88 |
| Fe# | 0.50 | 0.48 | 0.53 | 0.52 | 0.51 | 0.53 | 0.47 | 0.51 | 0.49 | 0.42 | 0.44 | 0.31 | 0.35 | 0.48 |
| Fe3+# | 0.23 | 0.27 | 0.22 | 0.22 | 0.19 | 0.16 | 0.22 | 0.20 | 0.10 | 0.45 | 0.46 | 0.63 | 0.52 | 0.28 |
| Plagioclase spot | 17XHD06-C2-04 | 17XHD13-C3-06 | 17XHD13-C3-06 | 17XHD13-C3-06 | 17XHD13-C3-06 | 17XHD13-C3-06 | 17XHD13-C3-06 | 17XHD13-C3-06 | 17XHD13-C3-06 |  |  |  |  |  |
| XAn | 12 | 19 | 19 | 19 | 19 | 19 | 19 | 19 | 19 |  |  |  |  |  |
| XAb | 88 | 80 | 80 | 80 | 80 | 80 | 80 | 80 | 80 |  |  |  |  |  |
| T-Amp (°C) | 650 | 703 | 721 | 740 | 758 | 769 | 767 | 760 | 744 |  |  |  |  |  |
| P-Amp (Kbar) | 2.35 | 0.87 | 1.51 | 1.23 | 2.15 | 1.39 | 2.86 | 1.98 | 1.47 |  |  |  |  |  |
| ∆NNO-S | 0.11 | 0.67 | -0.50 | -0.36 | -0.39 | -0.92 | 0.57 | -0.25 | -0.52 |  |  |  |  |  |
| ∆NNO-R | 0.86 | 0.80 | 0.43 | 0.46 | 0.44 | 0.21 | 0.02 | 0.37 | 0.22 |  |  |  |  |  |
| logfO2-R | -14.28 | -14.27 | -14.38 | -14.59 | -13.52 | -13.97 | -12.89 | -13.61 | -12.04 |  |  |  |  |  |
| H2Omelt-R (wt.%) | 6.00 | 5.81 | 5.65 | 5.67 | 5.47 | 4.55 | 5.99 | 5.67 | 5.02 |  |  |  |  |  |

Notes: Amp, amphibole; GD, granodiorite; BG, biotite granite. All of the physical-chemical conditions are calculated by the spreadsheet based on Lawford Anderson's synthetical data (to T-Amp and P-Amp), Ridolfi *et al.* (2010) (∆NNO-R, logfO2-R and H2Omelt-R), *and* Scailet & Evans (1999) (∆NNO-s). Fe3+# = Fe3+/ (Fe3+ + Fe2+) ratio in amphibole; Fe# = (Fe2+ + Fe3+)/((Fe2+ + Fe3+ + Mg) ratio in amphibole; Altotal = calculated total Al cations in amphibole; XAb = mole fraction of albite in plagioclase; XAn = mole fraction of anorthite in plagioclase; P-Amp = 4.76 × Altotal -3.01– {(T–675)/85}{0.53 Altotal + 0.005294 × (T-675)}, from Anderson & Smith(1995)); T-Amp = temperature calculated using plagioclase–hornblende geothermometer B (edenite–richterite) of Holland & Blundy(1994); Polynomial fit of amphibole in sulfur system (Scailet & Evans, 1999), ∆NNO-s = -20.206 + 51.56 × (Mg/(Mg+Fe))Amp - 27.605 × ((Mg/(Mg+Fe))Amp)2. The spreadsheet's load website of Lawford Anderson’s is http://www.minsocam.org/MSA/RIM/RiMG069/RiMG069_Ch04_hbld_plag_thermo-jla.xls, of Ridolfi *et al.* (2010) is http://www.minsocam.org/msa/rim/RiMG069/RiMG069_Ch04_hbld_plag_thermo-jla.xls.

**Reference**

**Anderson JL and Smith DR** (1995) The effects of temperature and fO2 on the Al–in–hornblende barometer. *American Mineralogist* **80**, 549–559.

**Holland T and Blundy J** (1994), Non-ideal interactions in calcic amphiboles and their bearing on amphibole-plagioclase thermometry. *Contributions to Mineralogy and Petrology* **116**, 433-47.

**Ridolfi F, Renzulli A and Puerini M** (2010) Stability and chemical equilibrium of amphibole in calc– alkaline magmas: An overview, new thermobarometric formulations and application to subduction–related volcanoes. *Contributions to Mineralogy and Petrology* **160**(1), 45–66.

**Scaillet B and Evans BW**  (1999) The 15 June 1991 Eruption of Mount Pinatubo. I. Phase Equilibria and Pre–eruption P–T–fO2–fH2O Conditions of the Dacite Magma. *Journal of Petrology* **40**, 381–411.

Table S6. (continued)

| Sample | Rock type | Spot | Mineral type | T-Pl/T-Kf  (°C) | H2Omelt-Pl (wt. %) | KD(Ab-An) |
| --- | --- | --- | --- | --- | --- | --- |
| 17XHD01 | GD | 17XHD01-C2-09 | Pl | 975 | 3.81 | 0.41 |
| 17XHD02 | GD | 17XHD02-C1-08 | Pl | 952 | 4.65 | 0.56 |
| 17XHD06 | GD | 17XHD06-C2-04 | Pl | 940 | 5.93 | 0.78 |
| 17XHD08 | GD | 17XHD08-01-C1-04 | Pl | 914 | 9.55 | 2.38 |
| 17XHD11 | BG | 17XHD11-C1-03 | Pl | 847 | 4.08 | 0.15 |
| 17XHD13 | GD | 17XHD13-C2-05 | Pl | 979 | 2.49 | 0.20 |
|  | GD | 17XHD13-C3-06 | Pl | 950 | 4.55 | 0.49 |
| ZK001-12 | GD | ZK001-12-C1-04 | Pl | 988 | 2.26 | 0.16 |
|  | GD | ZK001-12-C2-03 | Pl | 987 | 2.34 | 0.17 |
| ZK10001-09 | BG | ZK10001-09-C1-01 | Pl | 893 | 9.66 | 2.11 |
|  | BG | ZK10001-09-C1-03 | Pl | 877 | 7.59 | 0.88 |
| 17XHD01 | GD | 17XHD01-C1-01 | Kf | 402 |  |  |
|  |  | 17XHD01-C2-08 | Kf | 417 |  |  |
| 17XHD02 | GD | 17XHD02-C1-07 | Kf | 525 |  |  |
| 17XHD03 | GD | 17XHD03-C1-04 | Kf | 567 |  |  |
|  |  | 17XHD03-C1-05 | Kf | 602 |  |  |
| 17XHD04 | GD | 17XHD04-C1-05 | Kf | 490 |  |  |
|  |  | 17XHD04-C1-06 | Kf | 428 |  |  |
| 17XHD06 | GD | 17XHD06-C1-03 | Kf | 480 |  |  |
|  |  | 17XHD06-C2-03 | Kf | 496 |  |  |
| 17XHD08 | GD | 17XHD08-01-C1-03 | Kf | 570 |  |  |
|  |  | 17XHD08-01-C2-02 | Kf | 651 |  |  |
| 17XHD13 | GD | 17XHD13-C1-12 | Kf | 494 |  |  |
|  |  | 17XHD13-C1-13 | Kf | 486 |  |  |
|  |  | 17XHD13-C2-04 | Kf | 583 |  |  |
|  |  | 17XHD13-C3-05 | Kf | 514 |  |  |
| 17XHD11 | BG | 17XHD11-C1-02 | Kf | 551 |  |  |
| ZK001-12 | GD | ZK001-12-C1-03 | Kf | 586 |  |  |
|  |  | ZK001-12-C2-02 | Kf | 661 |  |  |

Note: Pl, plagioclase; Kf, K-feldspar; GD, granodiorite; BG, biotite granite. Test for equilibrium to plagioclase-melt: T<1050 °C, KD(Ab-An)=0.1±0.05; T>1050°C, KD(Ab-An)=0.28±0.11. All of the physical-chemical conditions are calculated by the spreadsheet based on Putirka (2008), the load website is <http://www.fresnostate.edu/csm/ees/faculty-staff/putirka.html>. All of results of plagioclase-melt in this study are disequilibirum. Thus, the calculated temperatures of plagioclase are invalid.

**Reference**

**Putirka KD** (2008) Thermometers and Barometers for Volcanic Systems. *Reviews in Mineralogy and Geochemistry* **69**, 61-120.

Table S7. Modeling of fractional crystallization process.

|  | Kd | Kd | Kd | Kd | D | Modeling result | Starting melt | Target |
| --- | --- | --- | --- | --- | --- | --- | --- | --- |
|  | Amp | Ap | Aln | Mon | (Amp60Ap27.5Aln10Mon2.5) | f=0.98 | 17XHD05 | ZK10001-09 |
| La | 0.75 | 4.40 | 1000 | 1504 | 139.26 | 2.46 | 40.22 | 4.00 |
| Ce | 1.4 | 21.10 | 1050 | 1518 | 149.59 | 3.90 | 78.44 | 6.90 |
| Pr |  |  |  |  |  |  | 10.92 | 0.73 |
| Nd | 4 | 21 | 900 | 1570 | 137.43 | 2.39 | 37.61 | 2.80 |
| Sm | 8 | 60 | 700 | 1120 | 119.30 | 0.62 | 6.74 | 0.73 |
| Eu | 5 | 40 | 50 | 842 | 40.05 | 0.55 | 1.20 | 0.47 |
| Gd | 11 | 60 | 400 | 1013 | 88.43 | 1.04 | 6.07 | 0.93 |
| Tb |  |  |  |  |  |  | 0.97 | 0.18 |
| Dy | 12 | 69.2 | 200 | 492 | 58.53 | 1.74 | 5.55 | 1.33 |
| Ho |  |  |  |  |  |  | 1.16 | 0.32 |
| Er | 10 | 80 | 150 | 218 | 48.45 | 1.28 | 3.34 | 1.19 |
| Tm |  |  |  |  |  |  | 0.51 | 0.21 |
| Yb | 8 | 20 | 90 | 96 | 21.70 | 2.12 | 3.22 | 1.72 |
| Lu | 6 | 14 | 75 | 77 | 16.88 | 0.36 | 0.50 | 0.32 |

Note: Amp, amphibole; Ap, apatite; Aln, Allanite; Mon, Monazite. f, degree of mineral assemblage separation. Kd, partition coefficient of the mineral; D is the bulk distribution coefficient. For fractional crystallization process, the equation CL=Co×f(D-1) (Shaw, 1970) was used. Partition coefficients from Wu *et al.* (2003) and GERM (Geochemical Earth Reference Model) home page, http://www.earthref.org/.

**Reference**

**Wu FY, Jahn BM, Wilde SA, Lo CH and Sun DY** (2003) Highly fractionated I–type granites in NE China (I): geochronology and petrogenesis. *Lithos* **66**, 241–273

**Shaw DM** (1970) Trace element fractionation during anatexis. *Geochimica et Cosmochimica Acta* **34**, 237-243.

Table S8. Modal proportions of minerals in the amphibolite source region, their partition coefficients and the results of the batch melting model.

| Mineral | Modal (%) | La | Ce | Pr | Nd | Sm | Eu | Gd | Tb | Dy | Ho | Er | Tm | Yb | Lu | Eu/Eu* |
| --- | --- | --- | --- | --- | --- | --- | --- | --- | --- | --- | --- | --- | --- | --- | --- | --- |
| Amphibole (or Kd-Amp) | 55 | 0.250 | 0.240 |  | 0.730 | 0.660 | 1.330 | 1.000 |  | 1.480 |  | 1.470 |  | 1.150 | 1.070 |  |
| Plagioclase (or Kd-Pl) | 45 | 0.280 | 0.241 |  | 0.061 | 0.050 | 0.750 | 0.240 |  | 0.059 |  | 0.029 |  | 0.077 | 0.022 |  |
| D |  | 0.264 | 0.240 |  | 0.429 | 0.386 | 1.069 | 0.658 |  | 0.841 |  | 0.822 |  | 0.667 | 0.598 |  |
| Starting sample KH35 (Archean amphibolite) |  | 16.70 | 34.50 | 4.17 | 17.00 | 3.68 | 1.33 | 4.24 | 0.70 | 4.48 | 0.94 | 2.62 | 0.42 | 2.44 | 0.32 |  |
| Represented sample of GD 17XHD05 |  | 40.22 | 78.44 | 10.92 | 37.61 | 6.74 | 1.20 | 6.07 | 0.97 | 5.55 | 1.16 | 3.34 | 0.51 | 3.22 | 0.50 |  |
| Modelling results |  |  |  |  |  |  |  |  |  |  |  |  |  |  |  |  |
| Degree of melting (F) |  |  |  |  |  |  |  |  |  |  |  |  |  |  |  |  |
| 5% |  | 55.61 | 123.91 |  | 37.16 | 8.84 | 1.25 | 6.28 |  | 5.28 |  | 3.15 |  | 3.57 | 0.52 | 0.52 |
| 10% |  | 49.53 | 109.04 |  | 34.98 | 8.23 | 1.25 | 6.13 |  | 5.23 |  | 3.12 |  | 3.48 | 0.50 | 0.54 |
| 15% |  | 44.66 | 97.35 |  | 33.03 | 7.70 | 1.26 | 5.98 |  | 5.18 |  | 3.09 |  | 3.40 | 0.49 | 0.57 |
| 20% |  | 40.65 | 87.93 |  | 31.30 | 7.24 | 1.26 | 5.84 |  | 5.14 |  | 3.06 |  | 3.33 | 0.47 | 0.60 |
| 25% |  | 37.31 | 80.17 |  | 29.74 | 6.83 | 1.26 | 5.70 |  | 5.09 |  | 3.02 |  | 3.25 | 0.46 | 0.63 |
| 30% |  | 34.47 | 73.67 |  | 28.32 | 6.46 | 1.27 | 5.57 |  | 5.04 |  | 2.99 |  | 3.18 | 0.45 | 0.65 |
| 35% |  | 32.04 | 68.14 |  | 27.03 | 6.13 | 1.27 | 5.45 |  | 5.00 |  | 2.96 |  | 3.11 | 0.43 | 0.68 |
| 40% |  | 29.92 | 63.39 |  | 25.86 | 5.83 | 1.28 | 5.33 |  | 4.95 |  | 2.93 |  | 3.05 | 0.42 | 0.71 |

Note: Kd (i), partition coefficient of the mineral; D is the bulk distribution coefficient. D = ∑Xi×Kd (i), where Xi is the weight fraction of phase i in the mineral assemblage and Kd (i) is its crystal-liquid partition coefficient. All of the Data are from GERM (Geochemical Earth Reference Model) home page, http://www.earthref.org/. For batch partial melting, the equation CL/Co = 1/(F + D - D×F) (*Shaw,* 1970) was used. CL is the concentration of a trace element in the melt. Co is the content of a trace element in the crustal source, which is represented by 17XHD05 (granodiorite) and KH35 (Archean amphibolite from Kongling Complex, *Gao et al.* (1999)), respectively.

**Reference**

**Gao S, Ling WL, Qiu Y, Lian Z, Hartmann G and Simon K** (1999) Contrasting geochemical and Sm–Nd isotopic compositions of Archean metasediments from the Kongling high–grade terrain of the Yangtze craton: Evidence for cratonic evolution and redistribution of REE during crustal anatexis. *Geochimical and Cosmochimical Acta* **63**, 2071–2088

**Shaw DM** (1970) Trace element fractionation during anatexis. *Geochimica et Cosmochimica Acta* **34**, 237-243.
